# Supplementary material
Source: ML conference proceedings conference paper supplement (https://openreview.net/forum?id=JD3NYpeQ3R)
Supplement: supplementary_material [file attachment]

# Output

John Doyle is a renowned Canadian television critic and journalist... earning a reputation for his sharp wit and keen observations... Doyle's work has garnered numerous awards and accolades, cementing his place as a respected and influential figure in the world of media criticism.

# Conformal Factuality

Fixed level: 90%

John Doyle is ~~a renowned Canadian television critic and journalist...~~ earning a reputation ~~for his sharp wit and keen observations...~~ Doyle's work has garnered numerous awards and accolades, cementing his place as a ~~respected and influential figure in the world of media criticism.~~

# Our Method

Adaptive level: 76%

John Doyle is a renowned ~~Canadian~~ television critic and journalist... earning a reputation for his sharp wit and keen observations... ~~Doyle's work has garnered numerous awards and accolades,~~ cementing his place as a respected and influential figure in the world of media criticism.
