# Supplementary material
Source: ML conference proceedings conference paper supplement (https://openreview.net/forum?id=JD3NYpeQ3R)

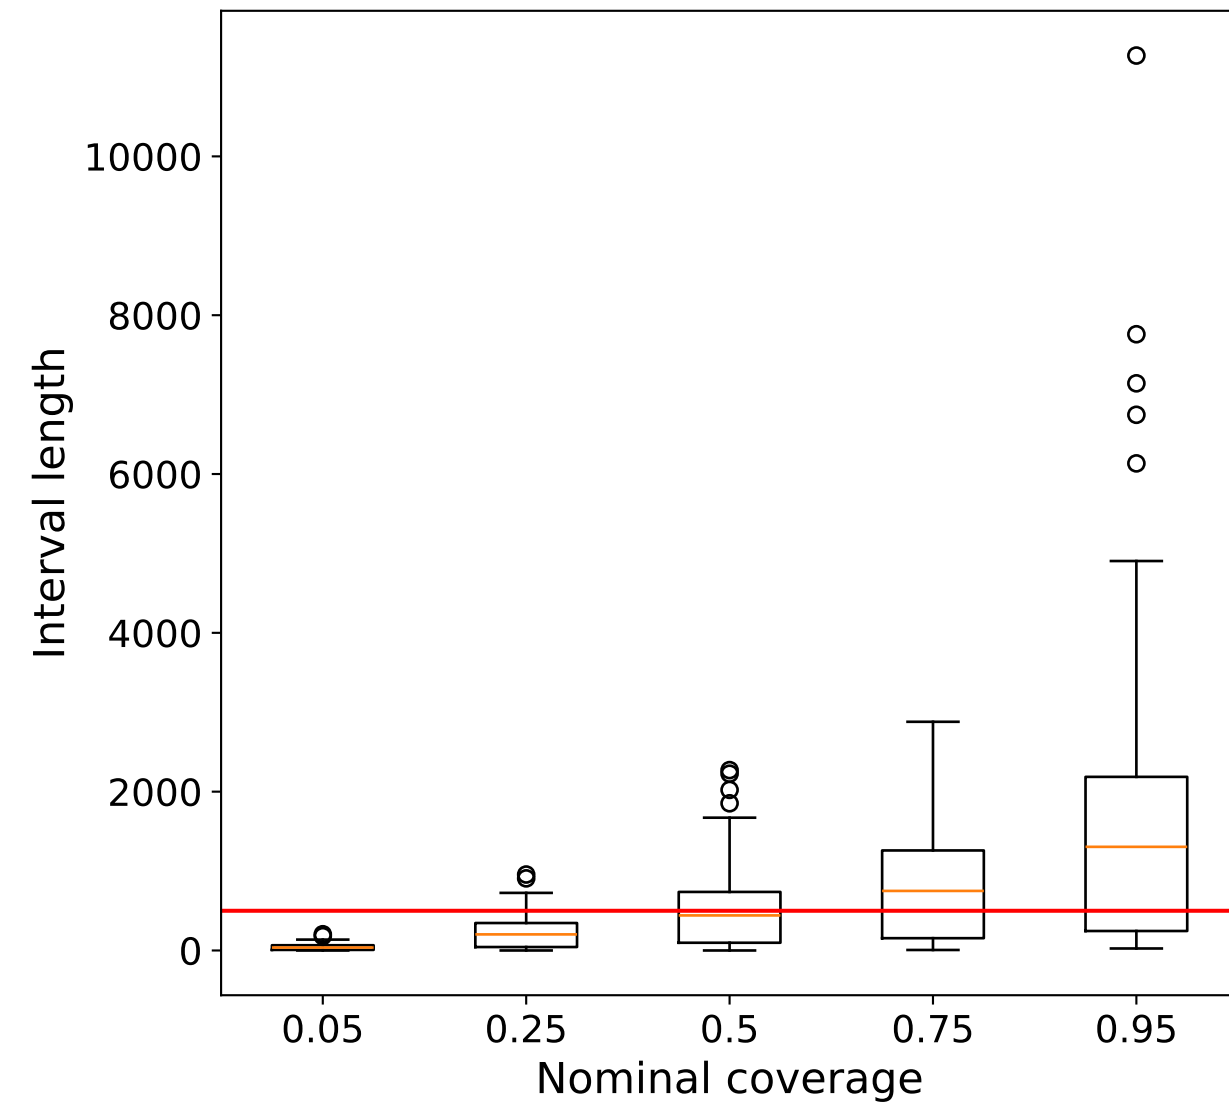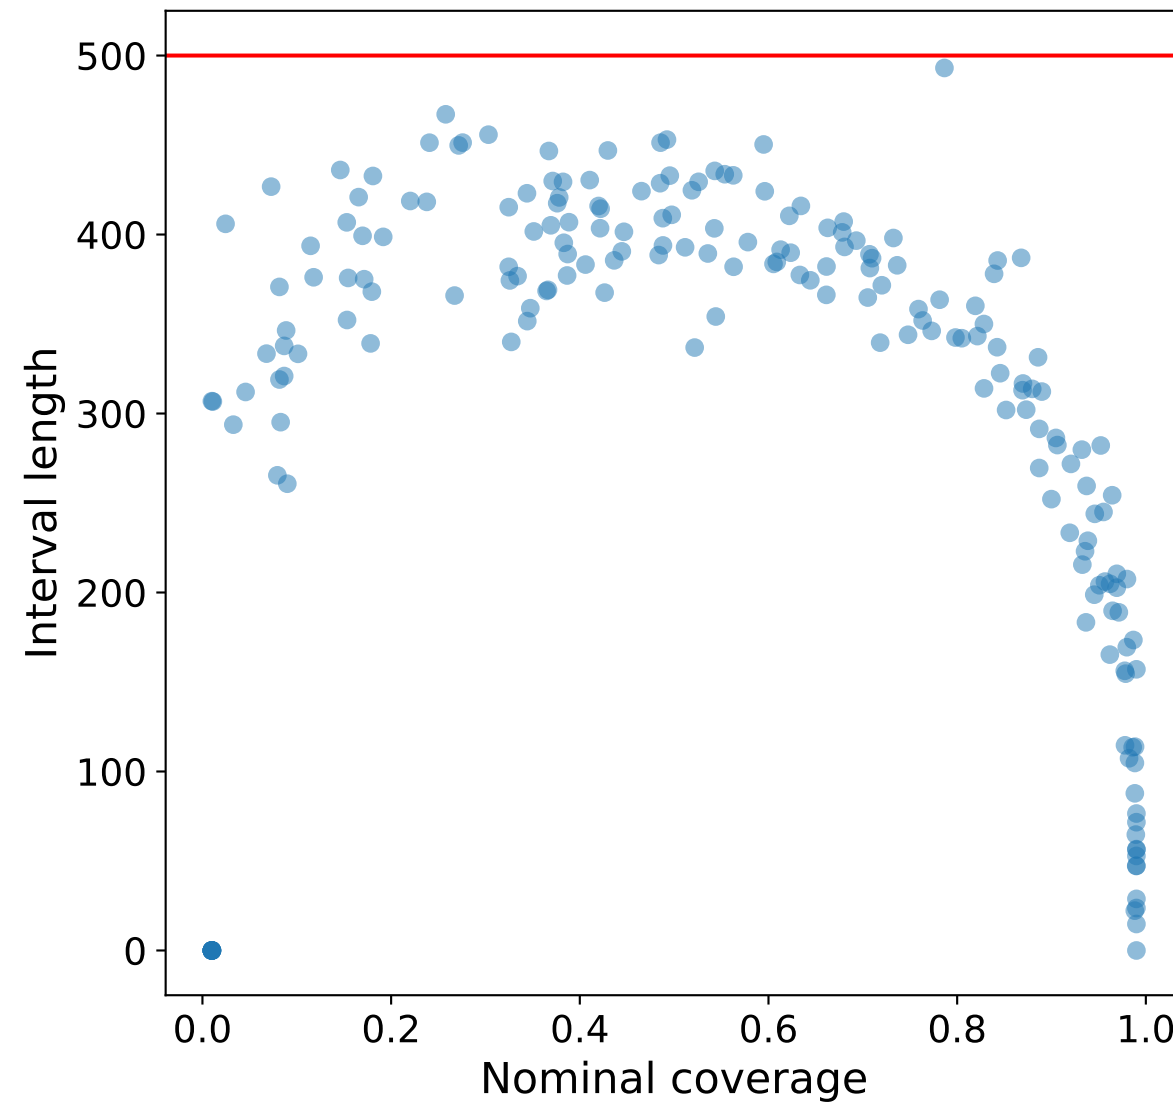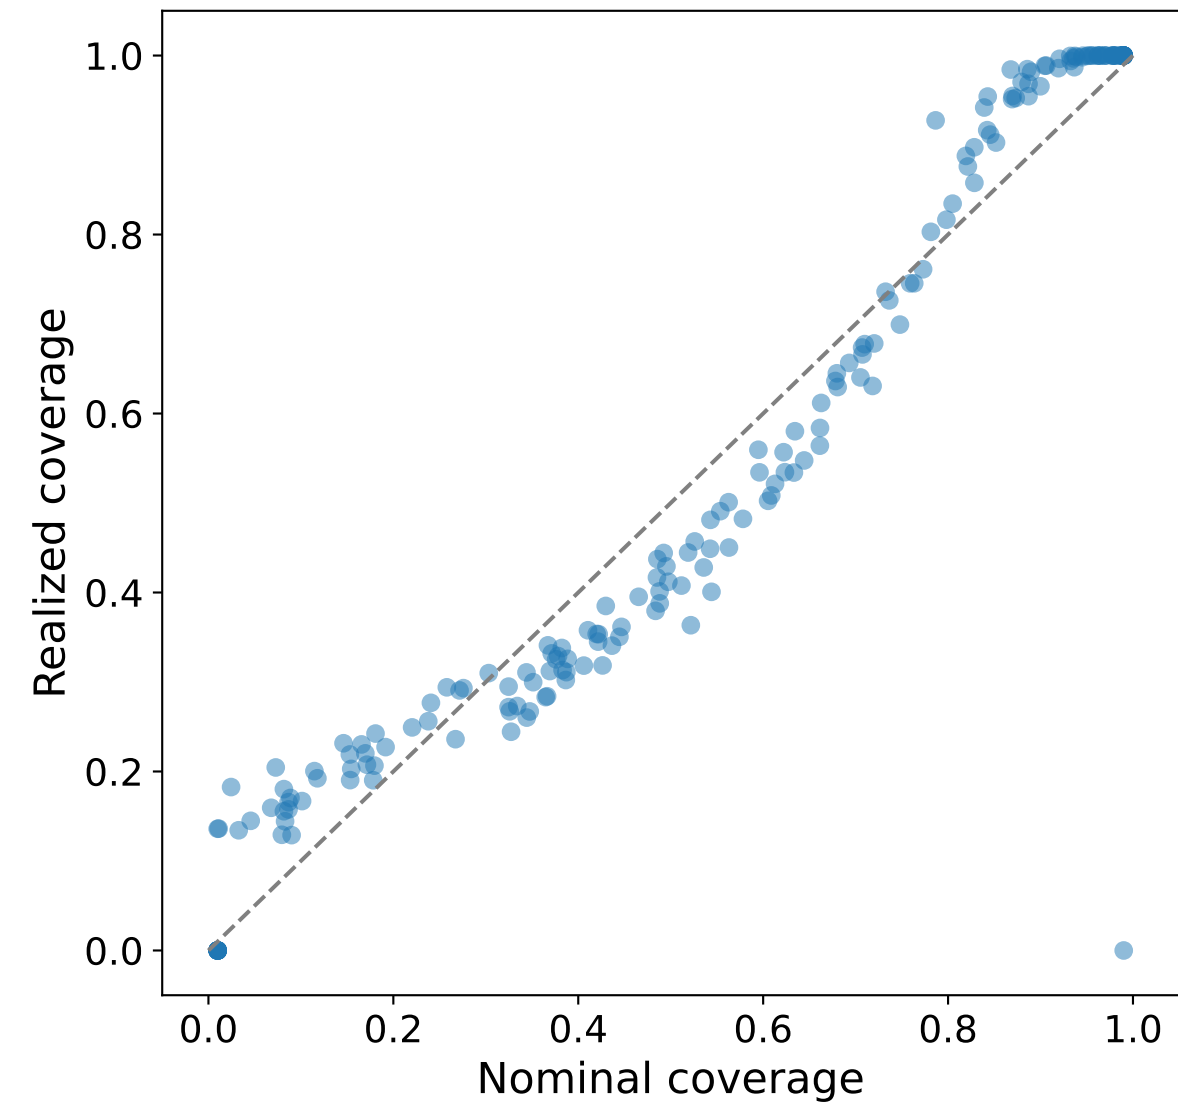

Supplement: supplementary_material [file attachment]

# Dual tracking

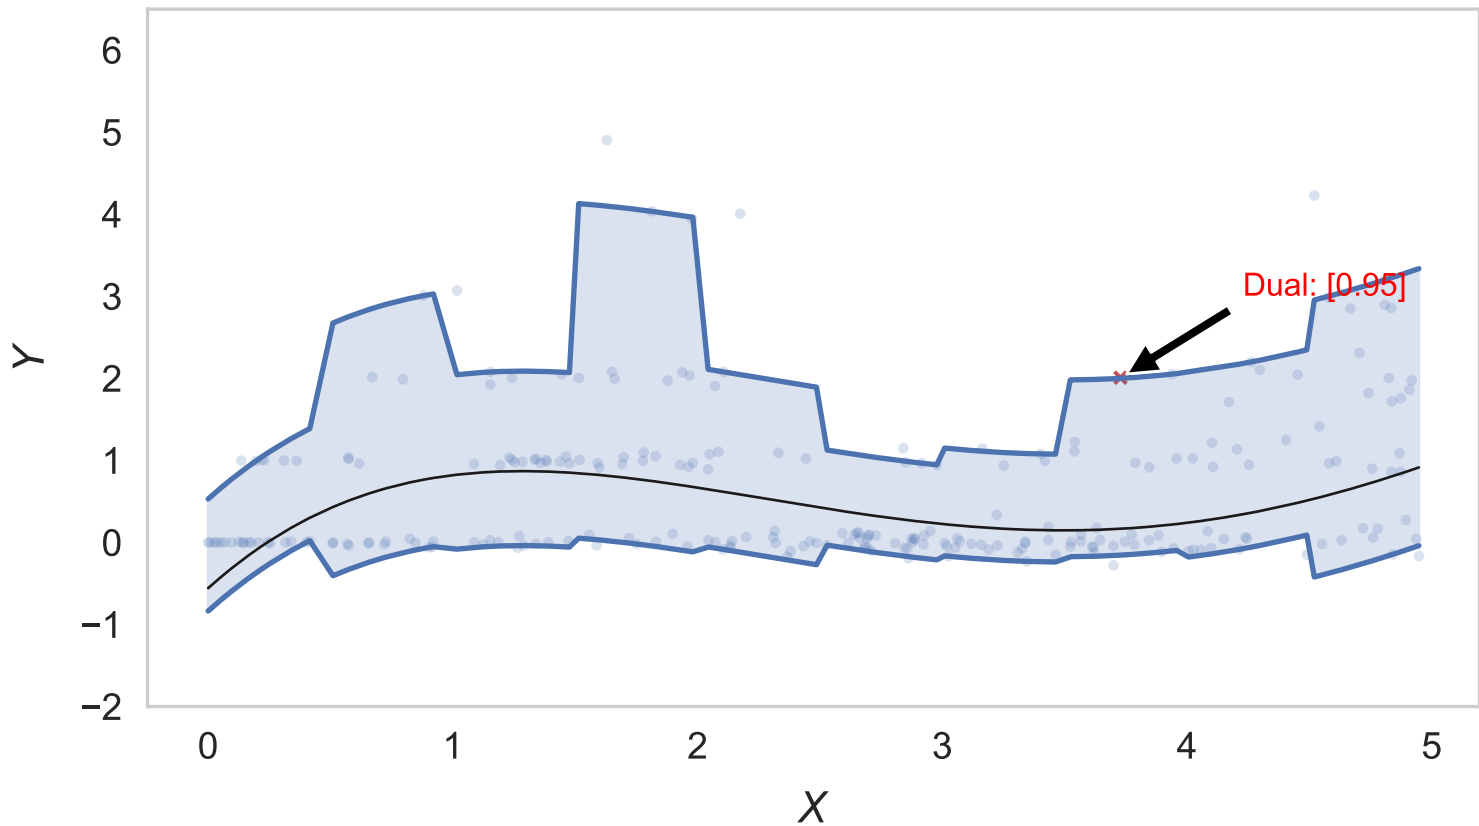

Supplement: supplementary_material [file attachment]

# Full conformal

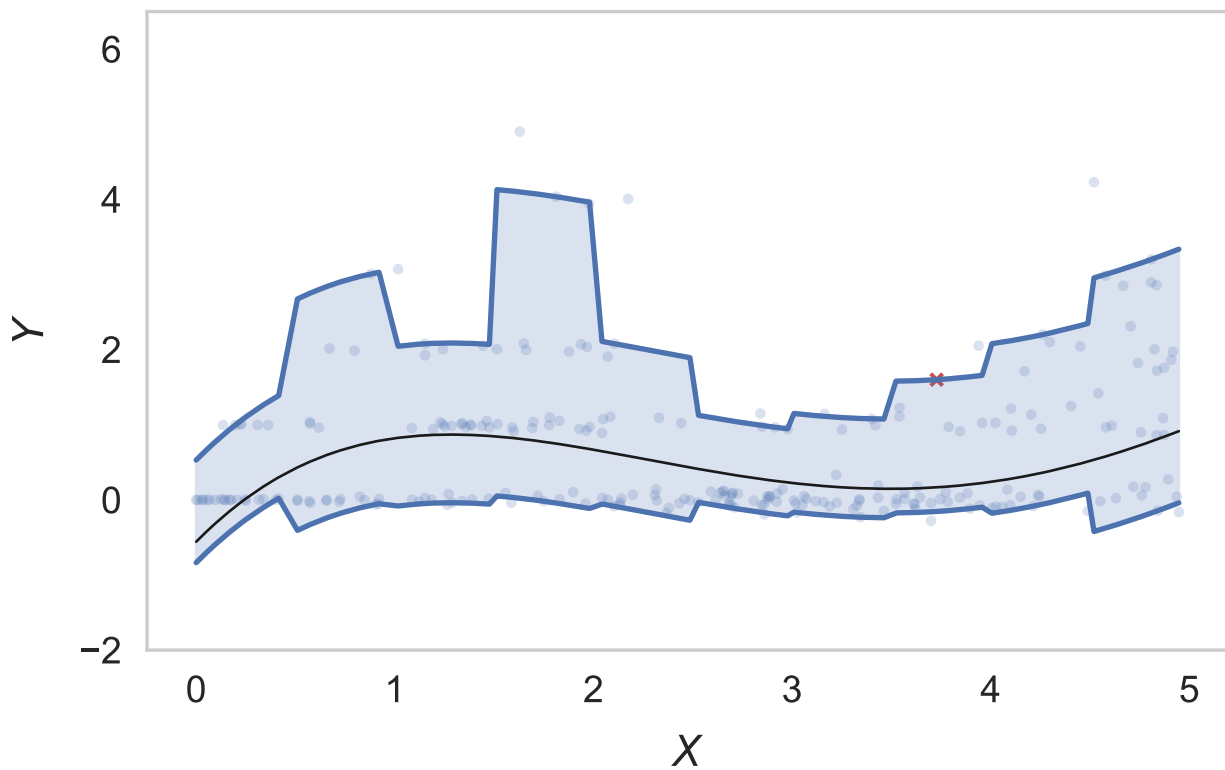

Supplement: supplementary_material [file attachment]

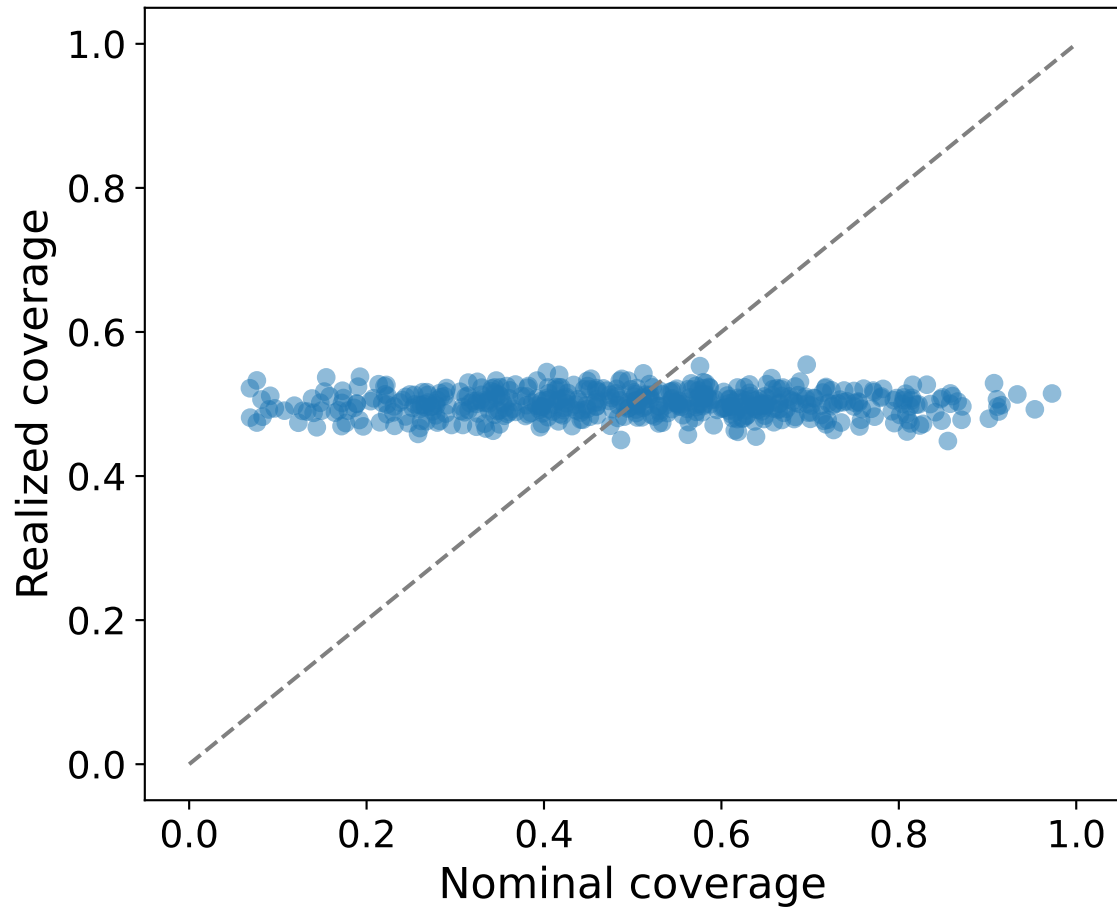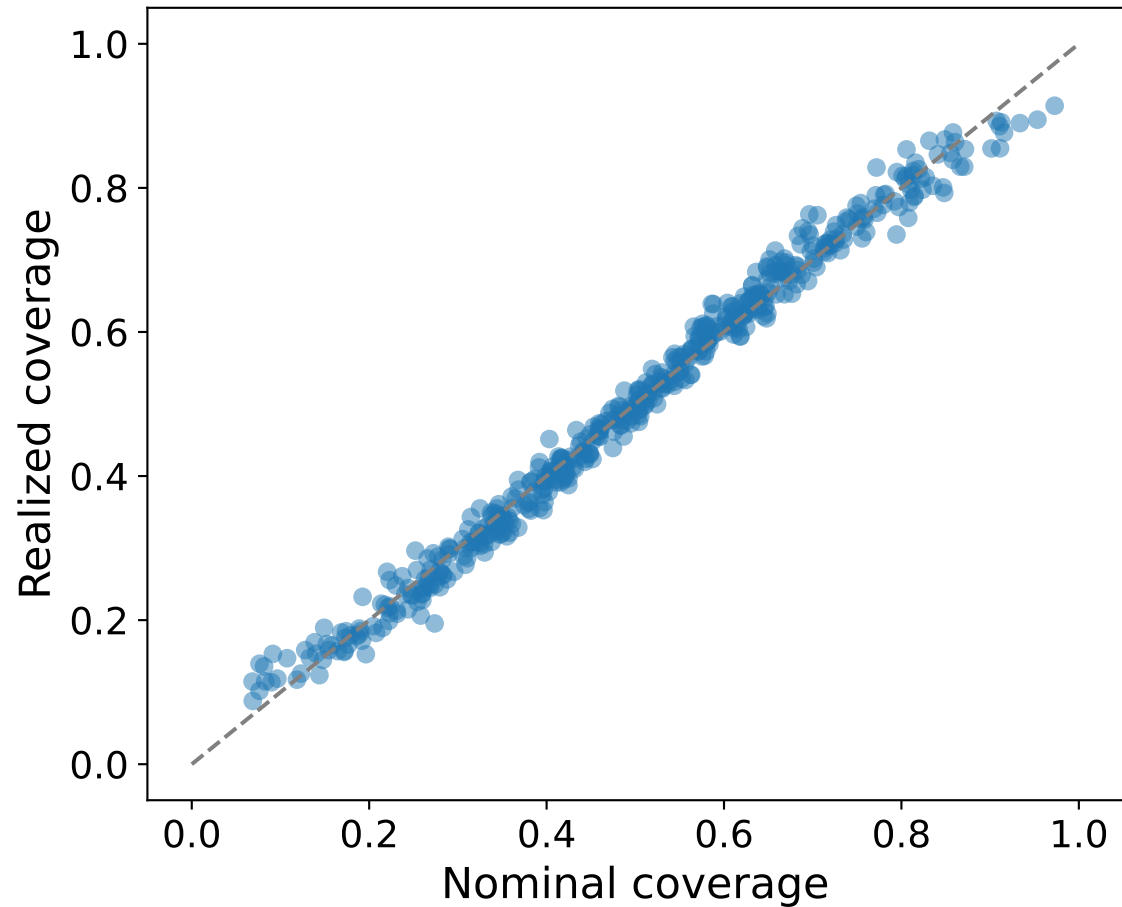

Supplement: supplementary_material [file attachment]

# Full conformal

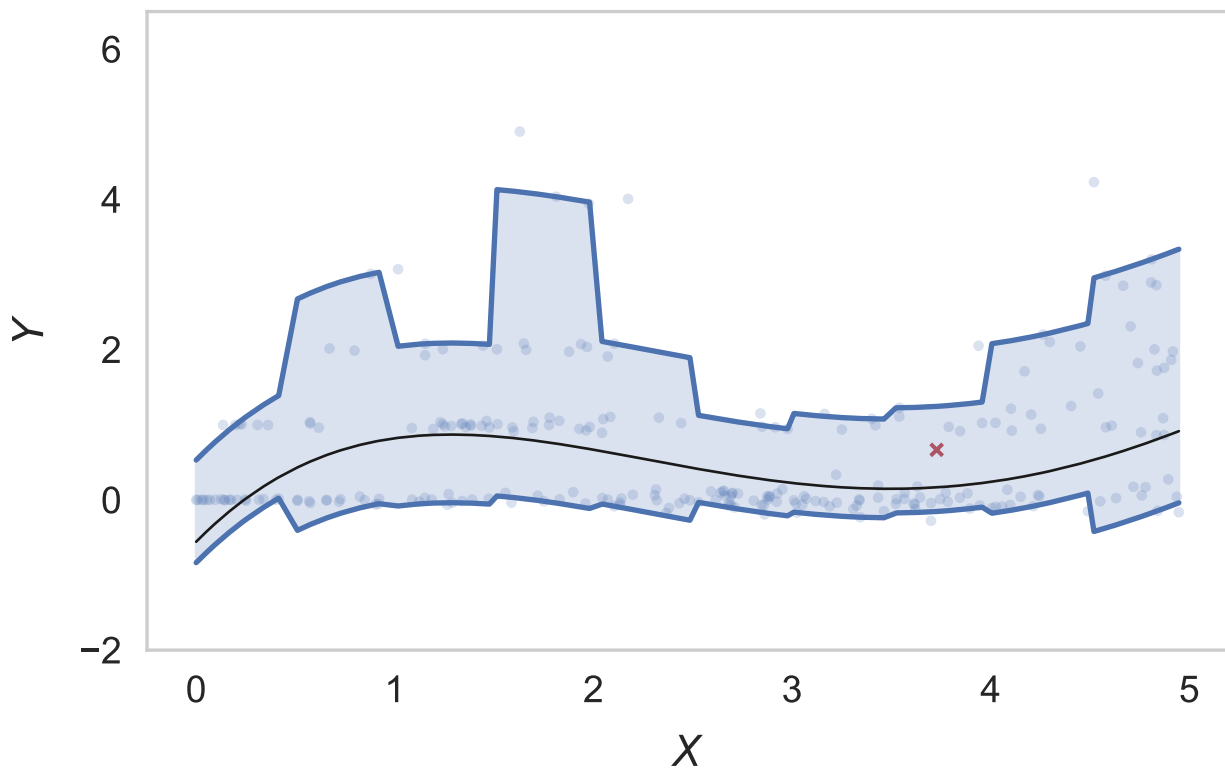

Supplement: supplementary_material [file attachment]

# Dual tracking

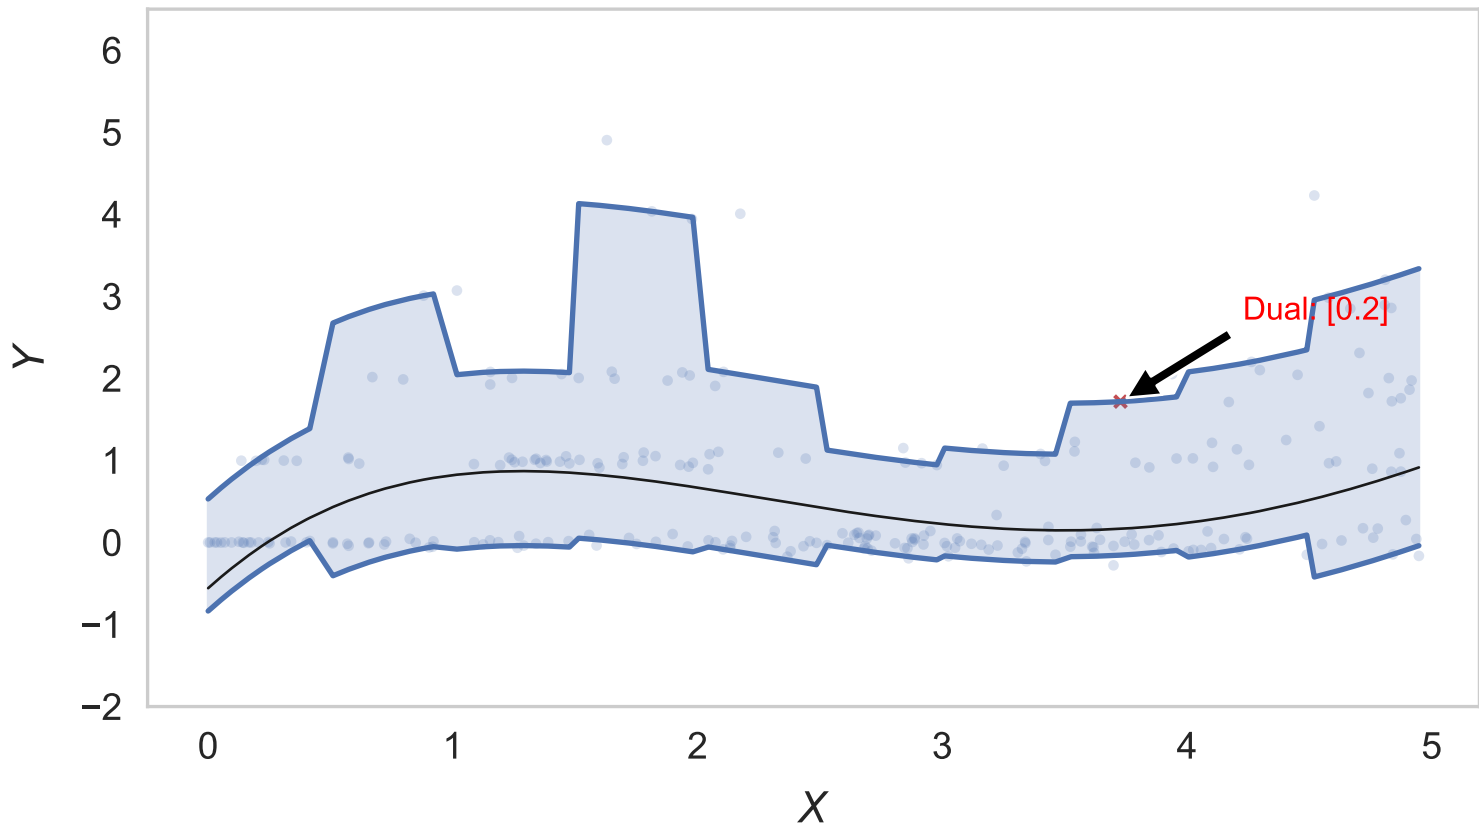

Supplement: supplementary_material [file attachment]

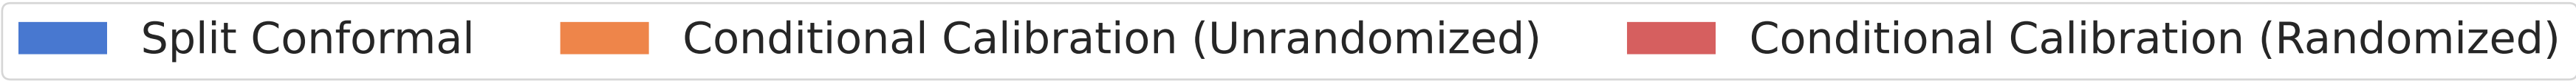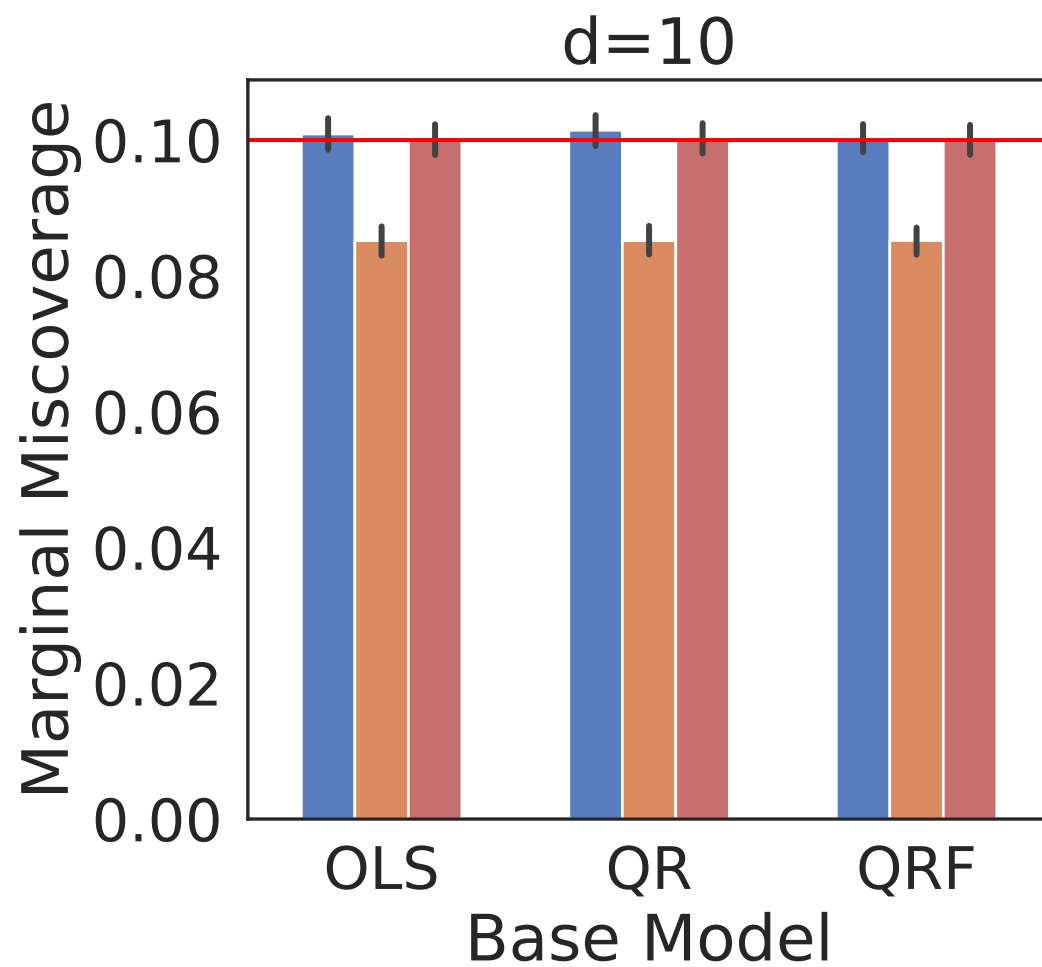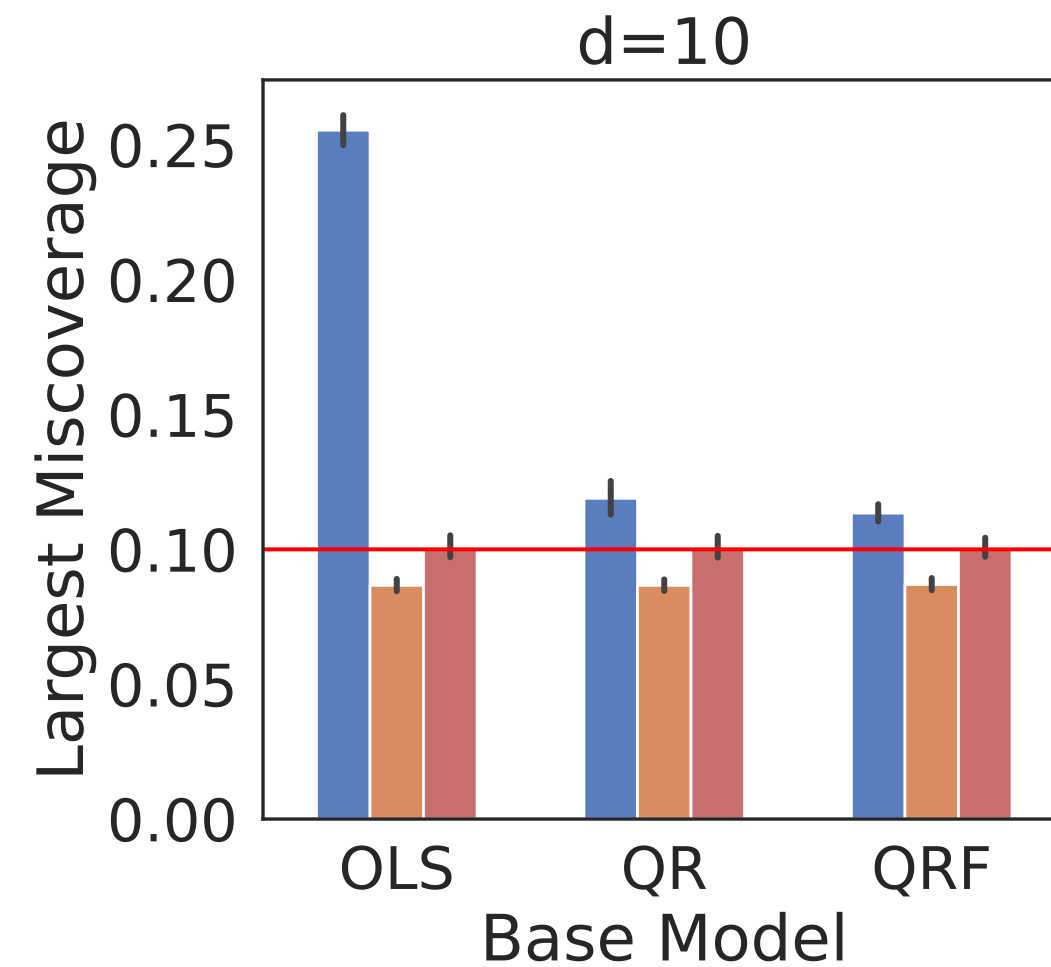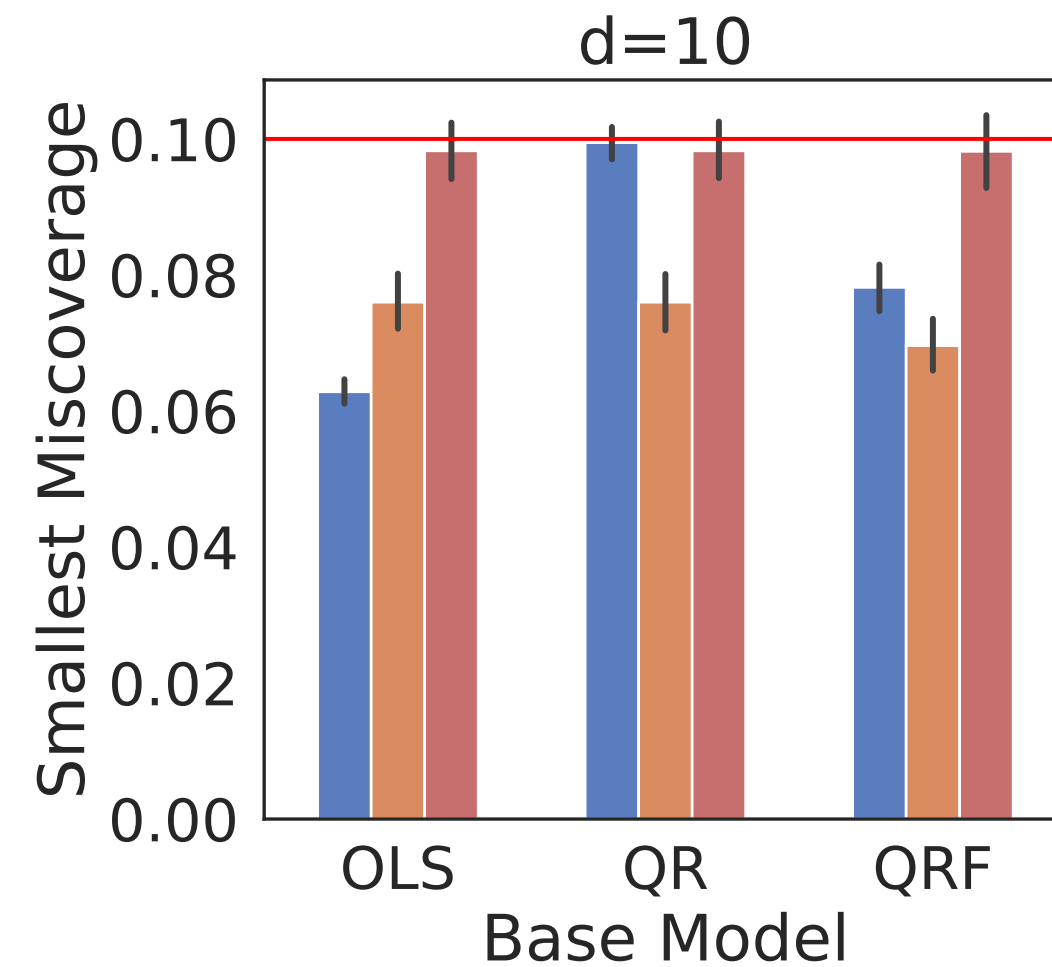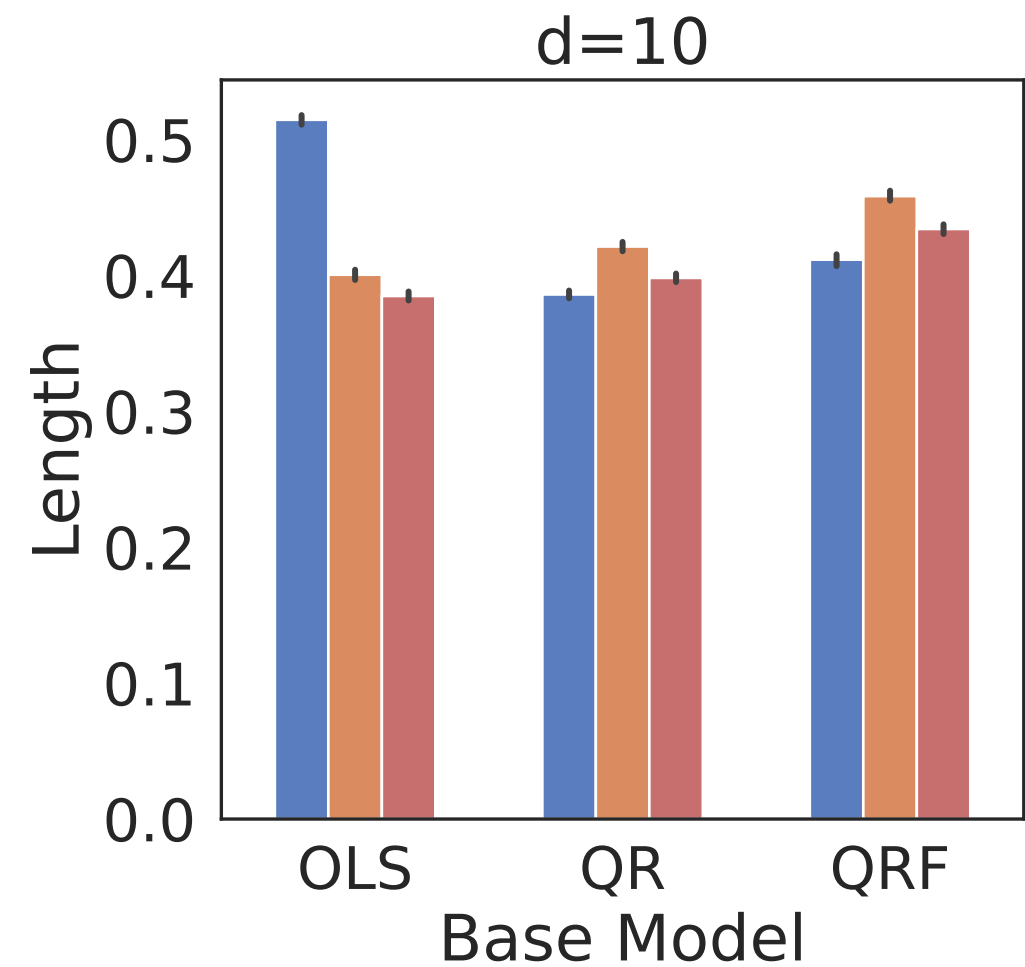

Supplement: supplementary_material [file attachment]

# Dual tracking

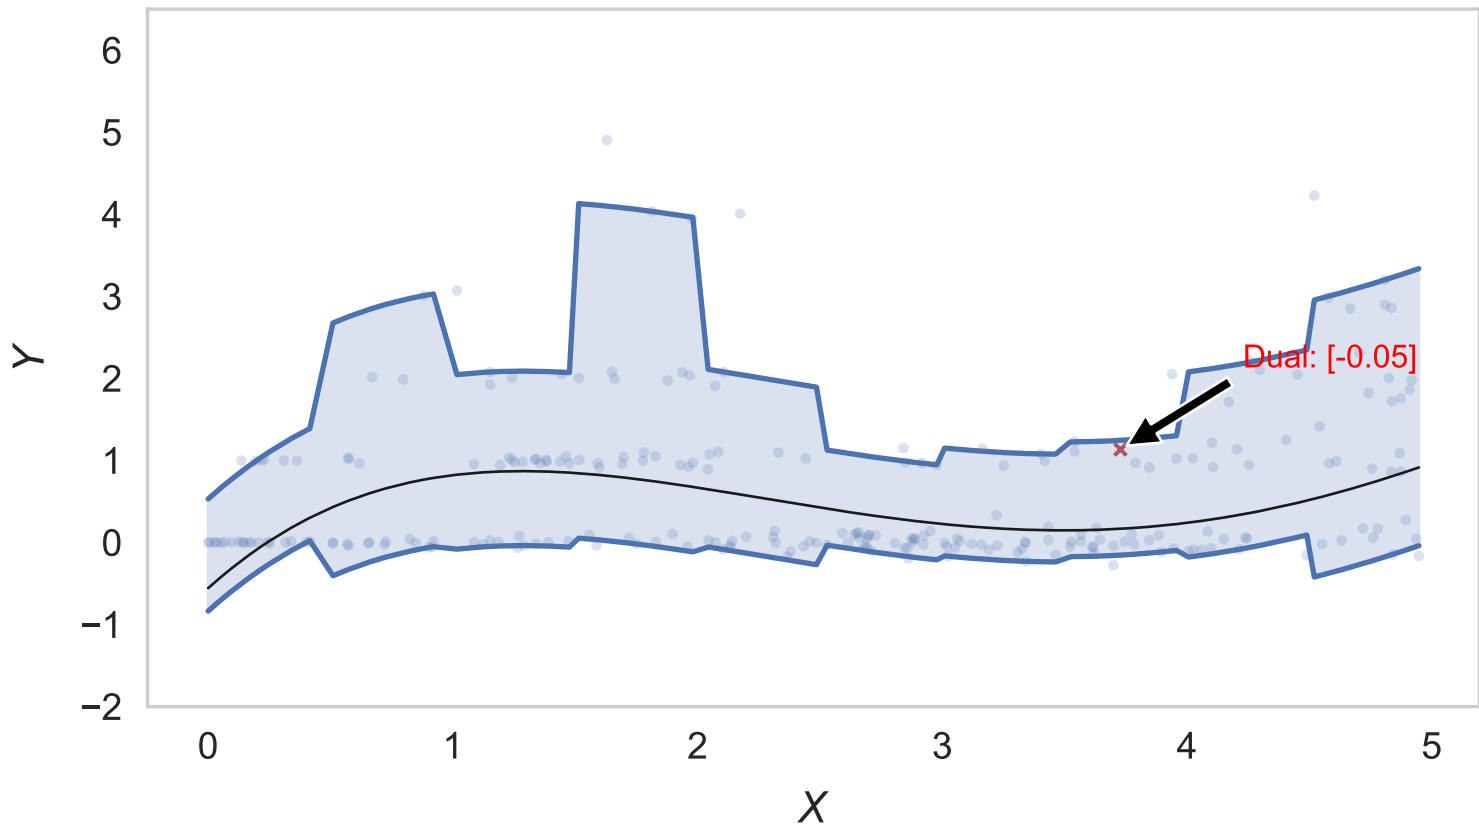

Supplement: supplementary_material [file attachment]

# Full conformal

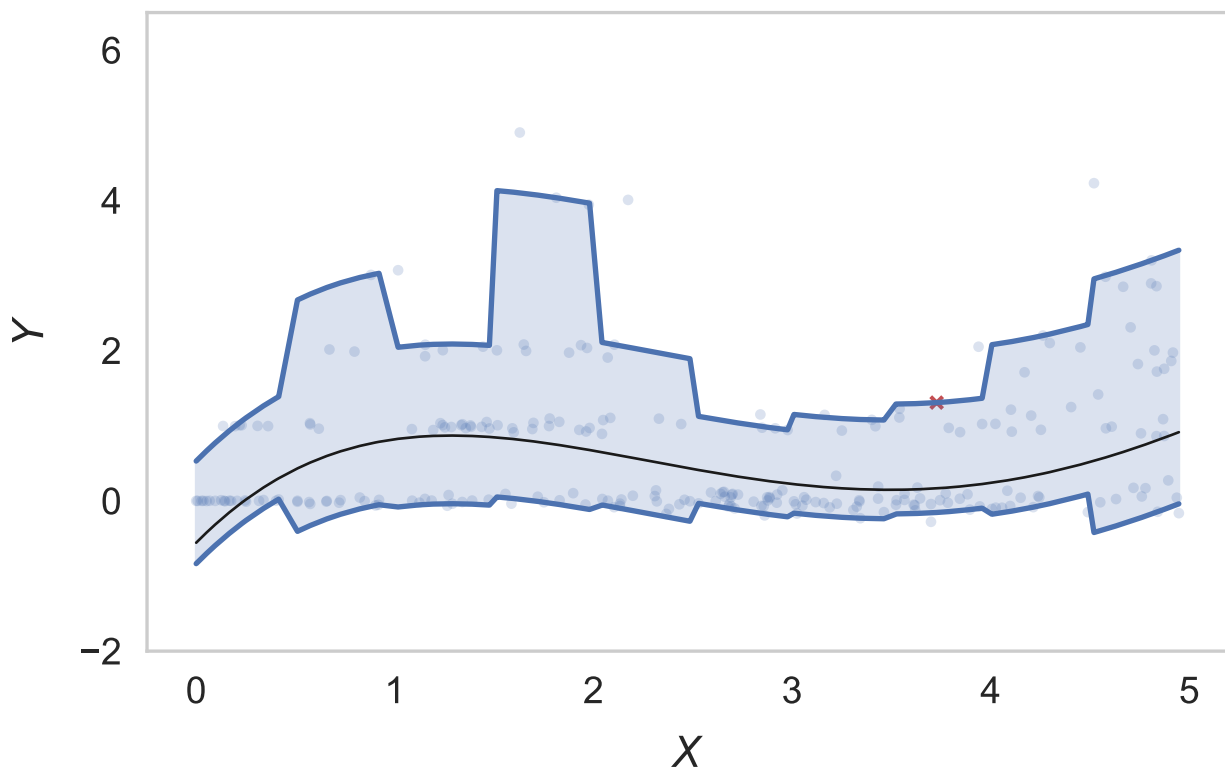

Supplement: supplementary_material [file attachment]

# Dual tracking

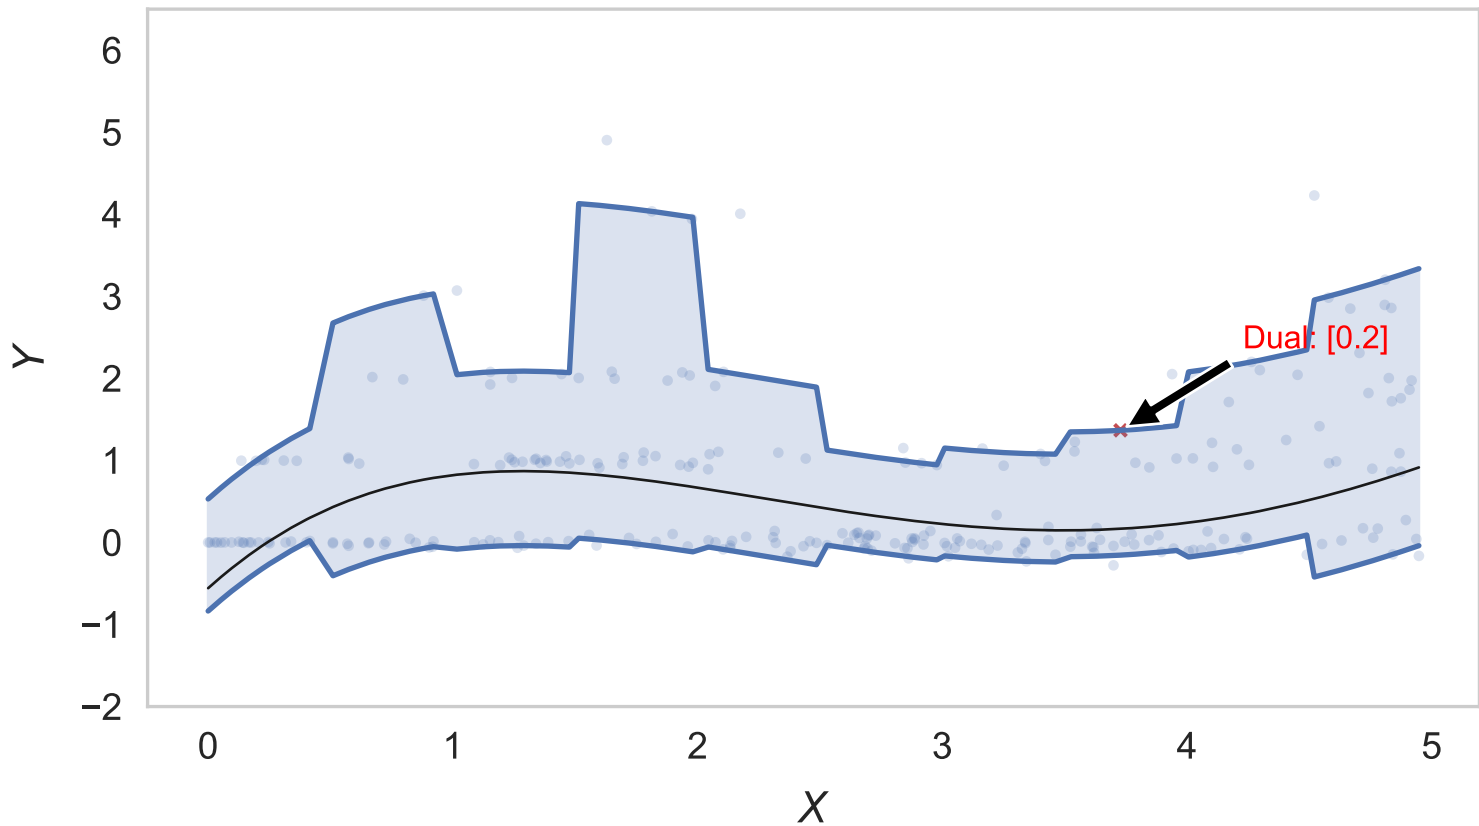

Supplement: supplementary_material [file attachment]

# Dual tracking

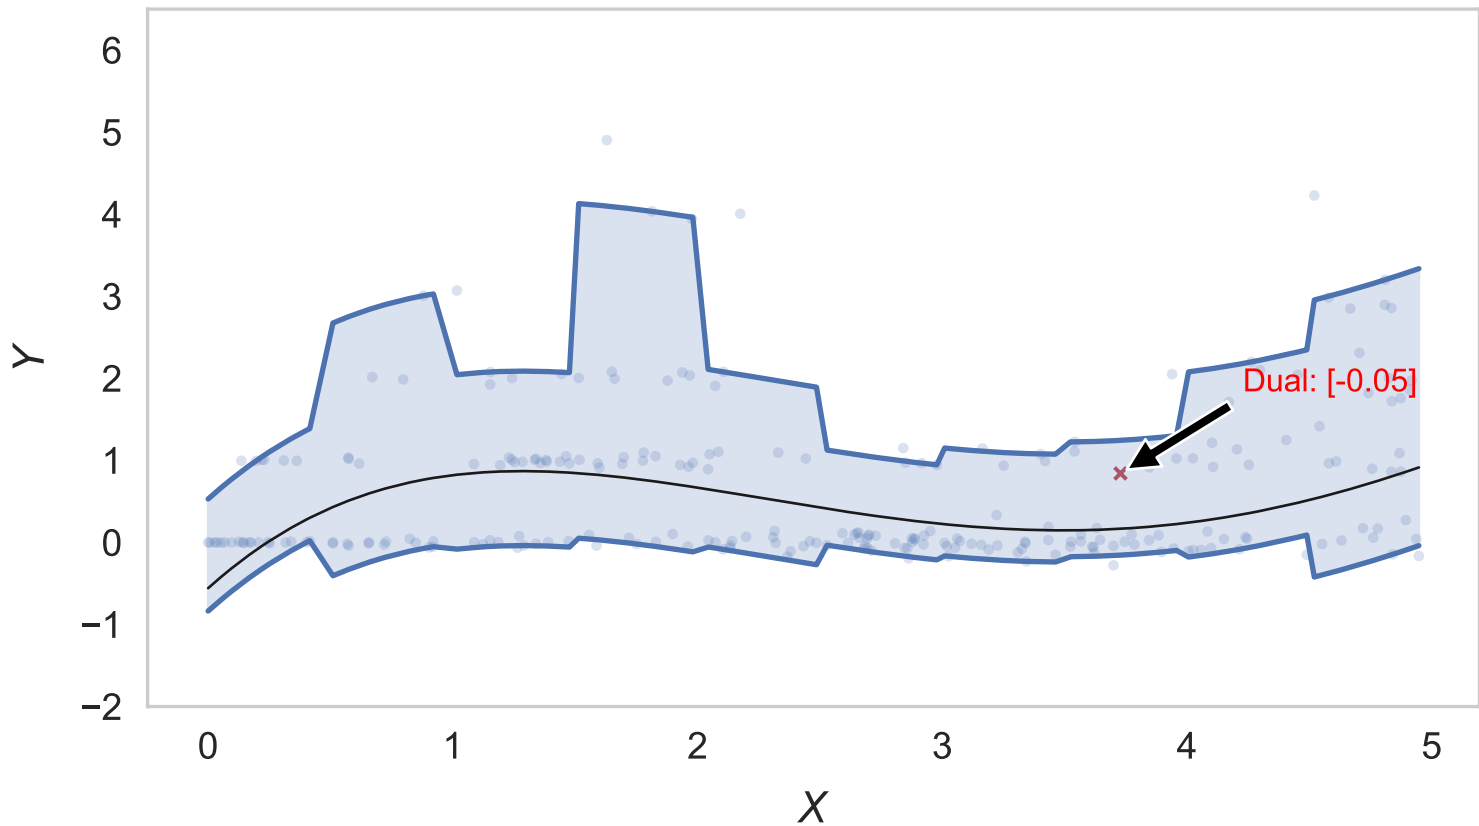

Supplement: supplementary_material [file attachment]

### Split Conformal

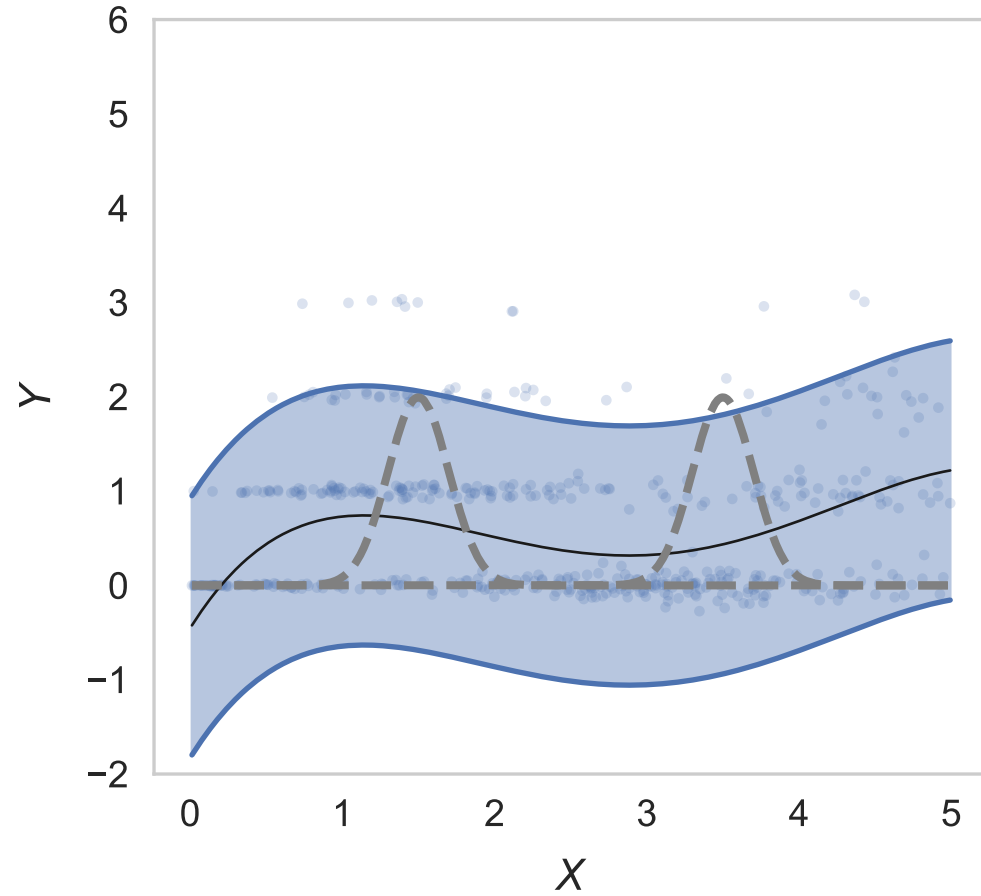

### Conditional Calibration

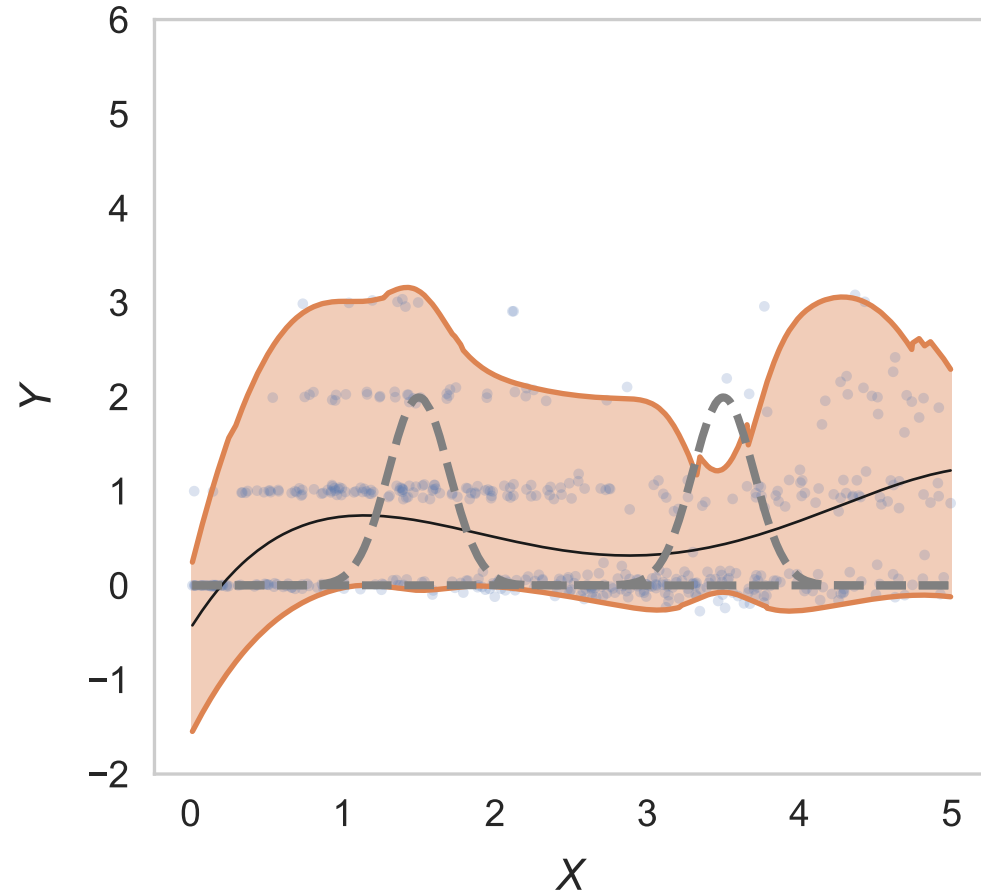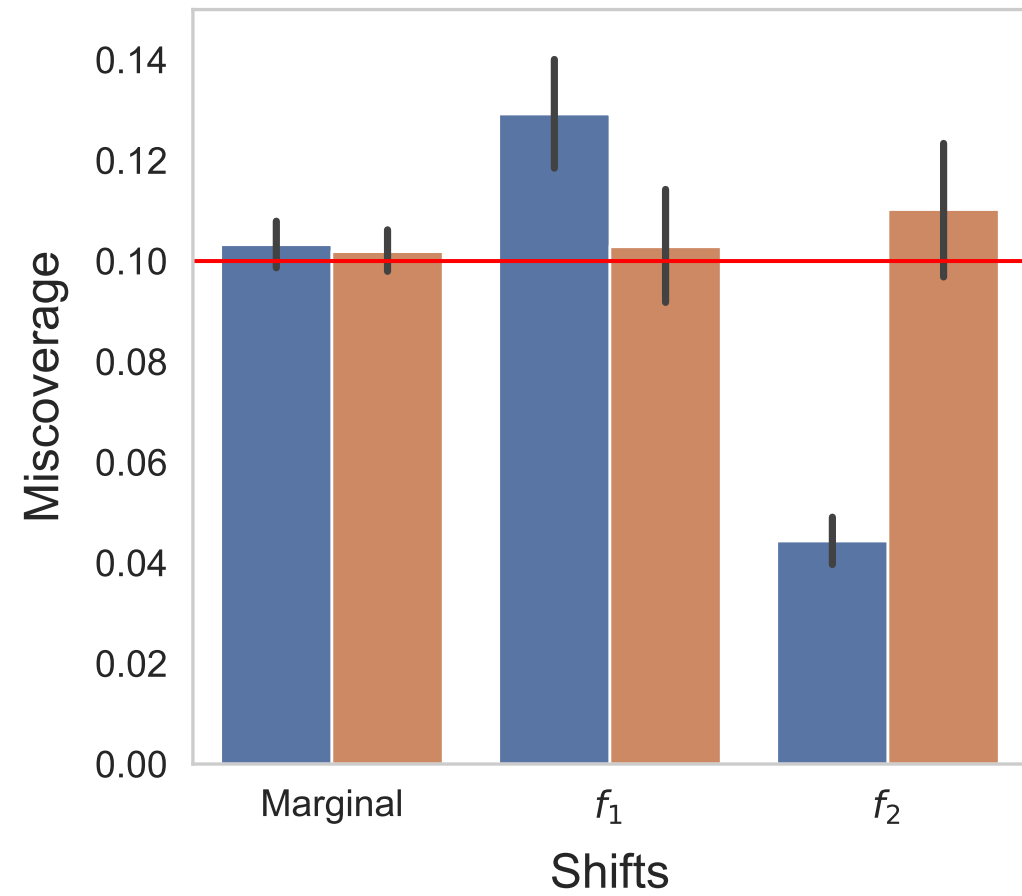

Supplement: supplementary_material [file attachment]

### Split Conformal

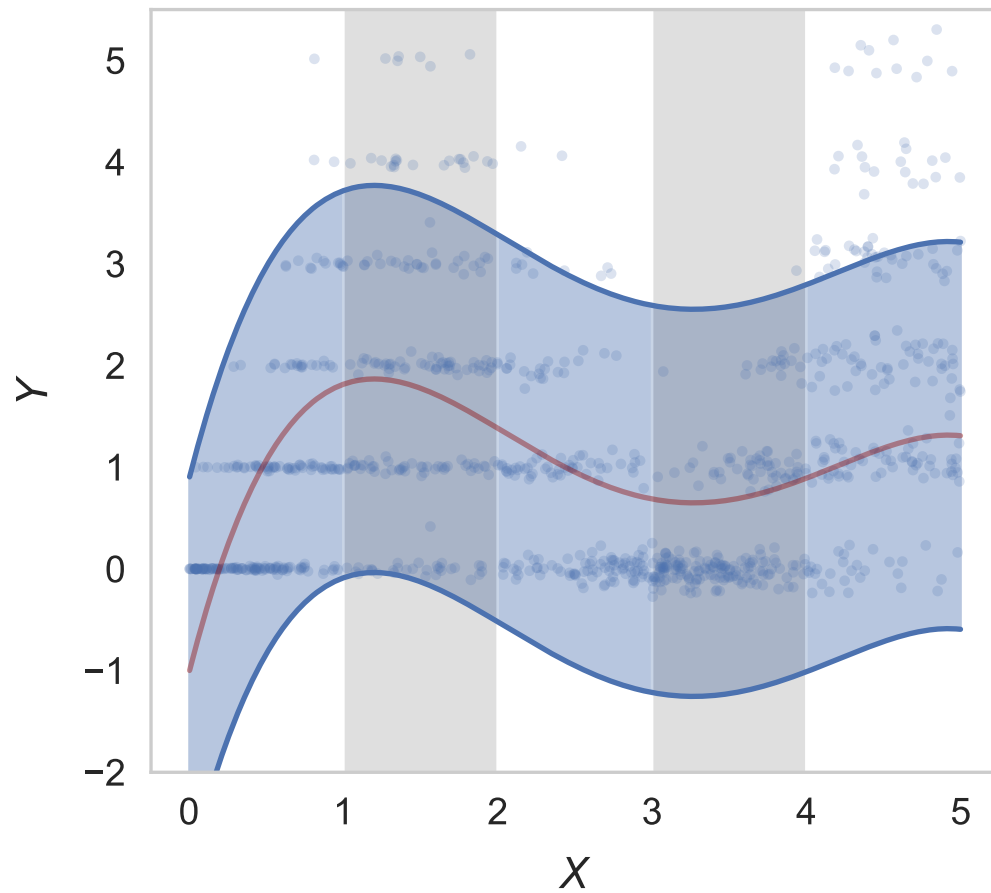

### Conditional Calibration

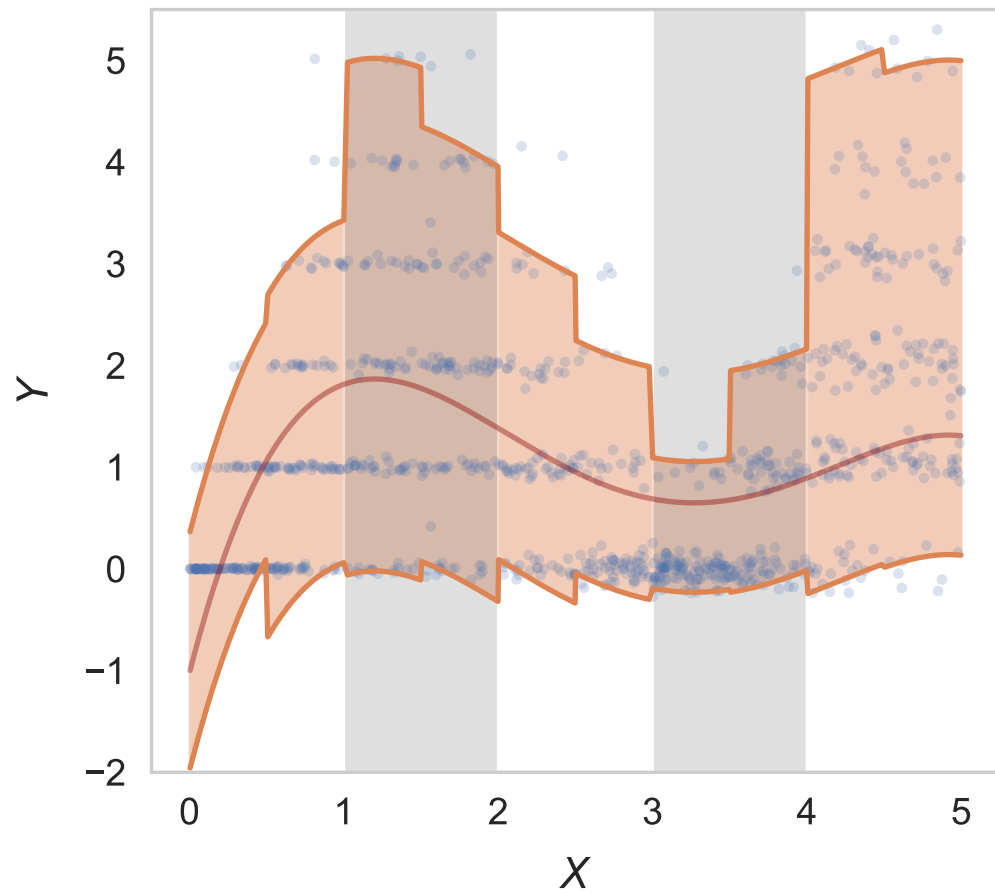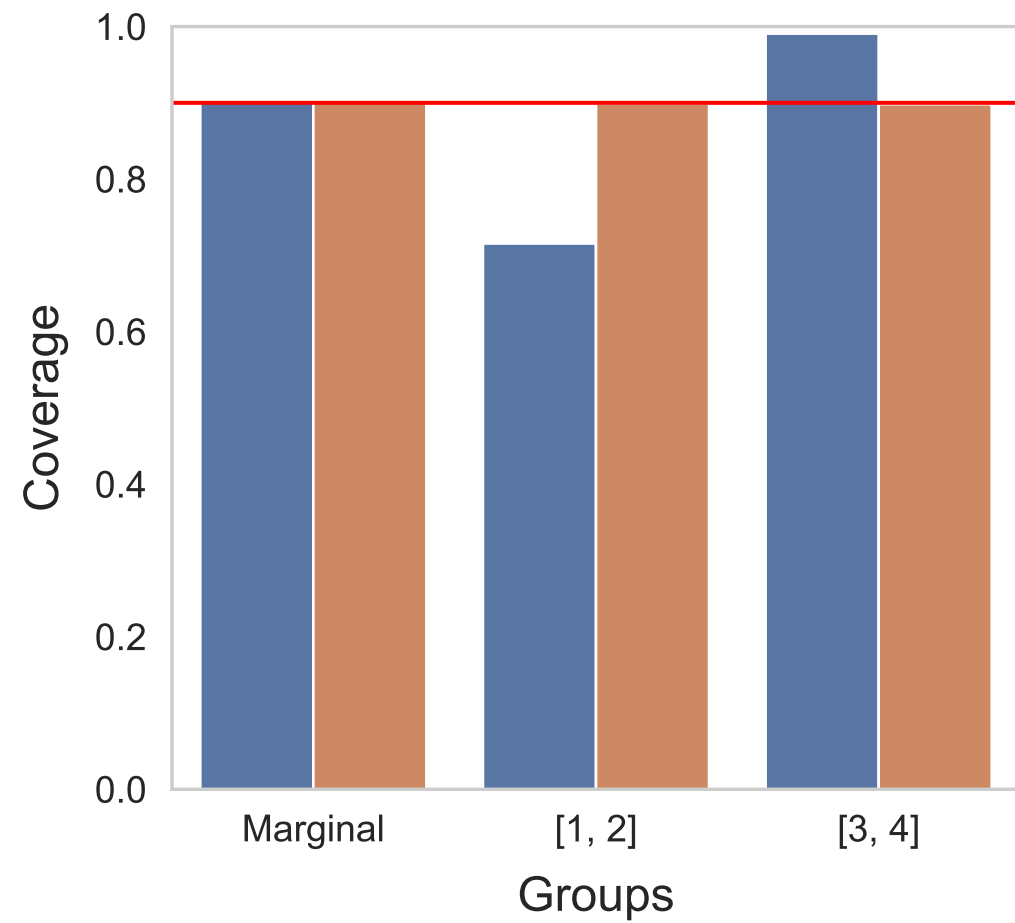

Supplement: supplementary_material [file attachment]

# Full conformal

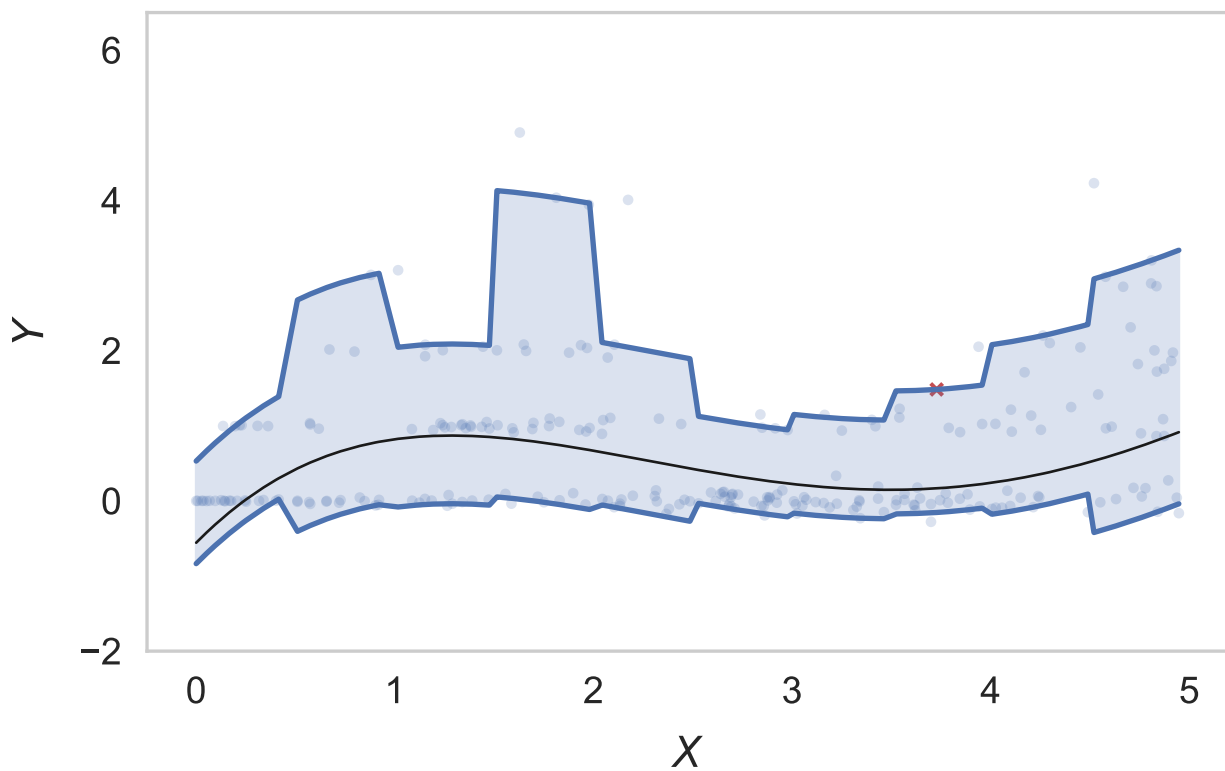

Supplement: supplementary_material [file attachment]

# Dual tracking

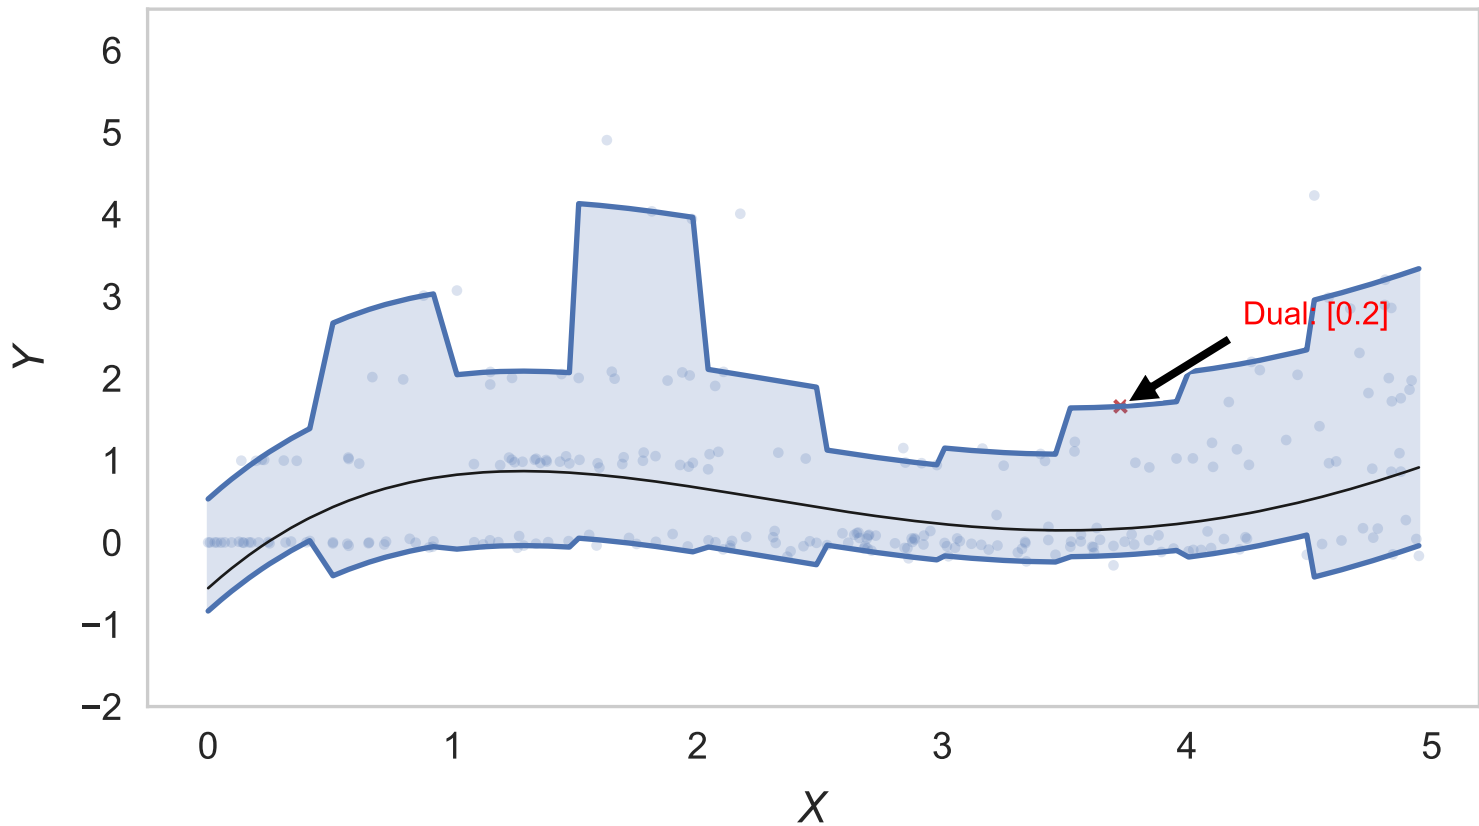

Supplement: supplementary_material [file attachment]

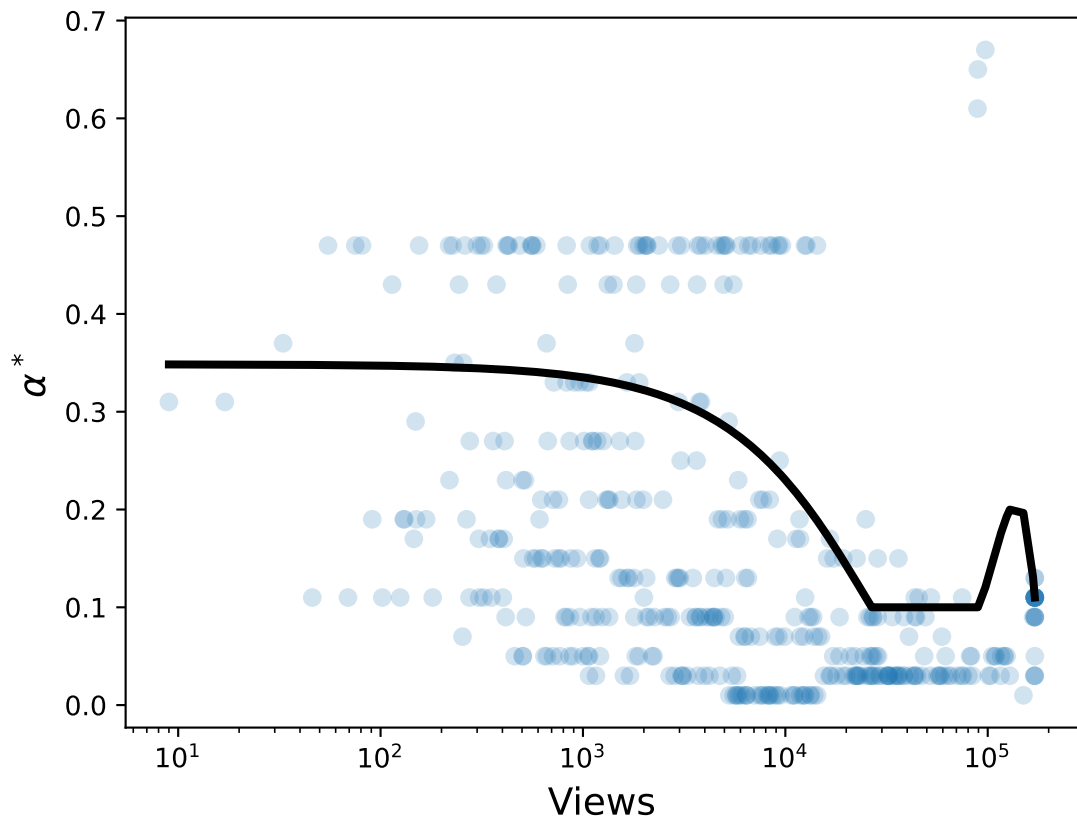

Supplement: supplementary_material [file attachment]

# Dual tracking

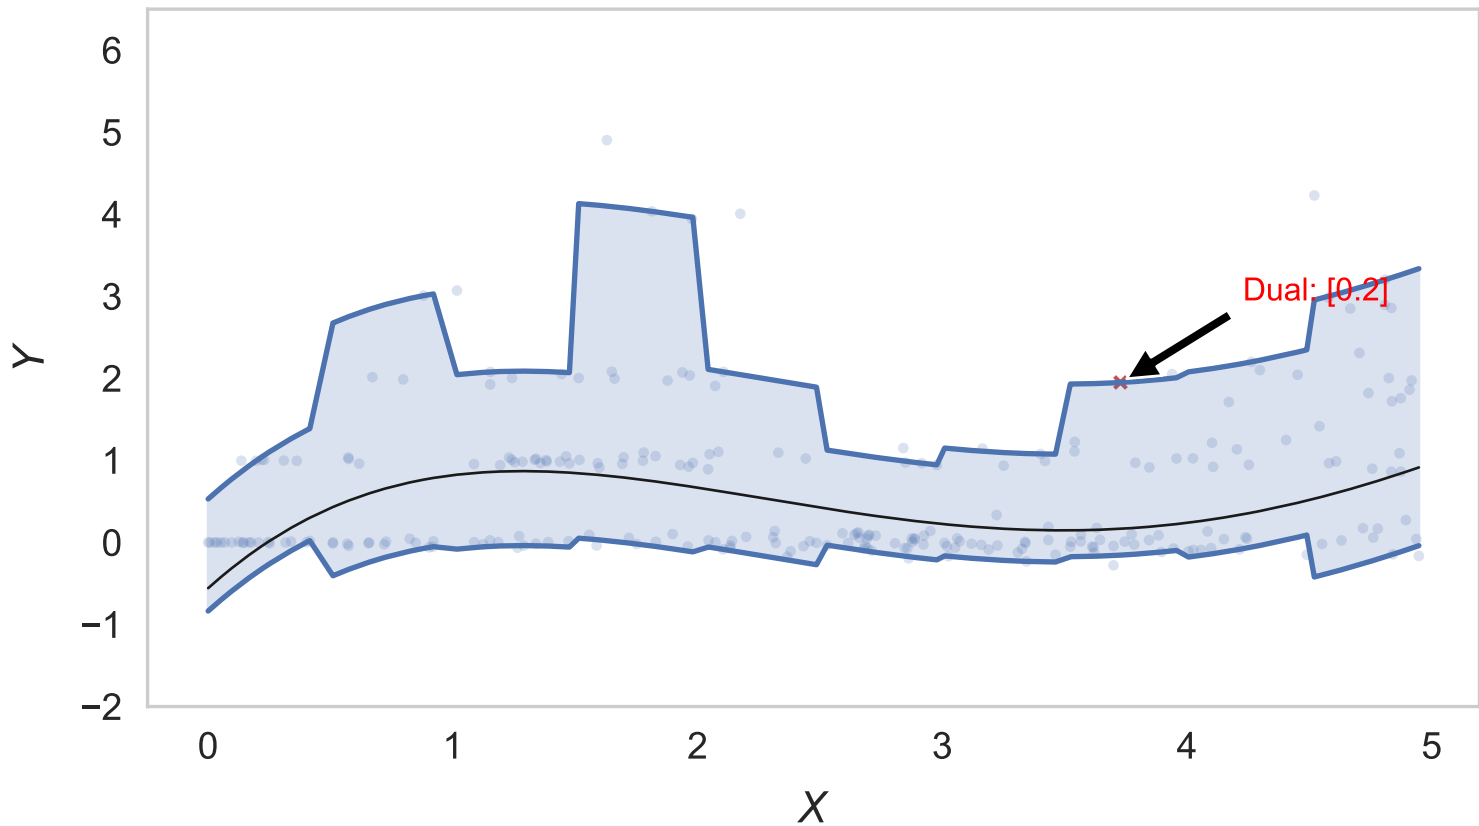

Supplement: supplementary_material [file attachment]

Split Conformal

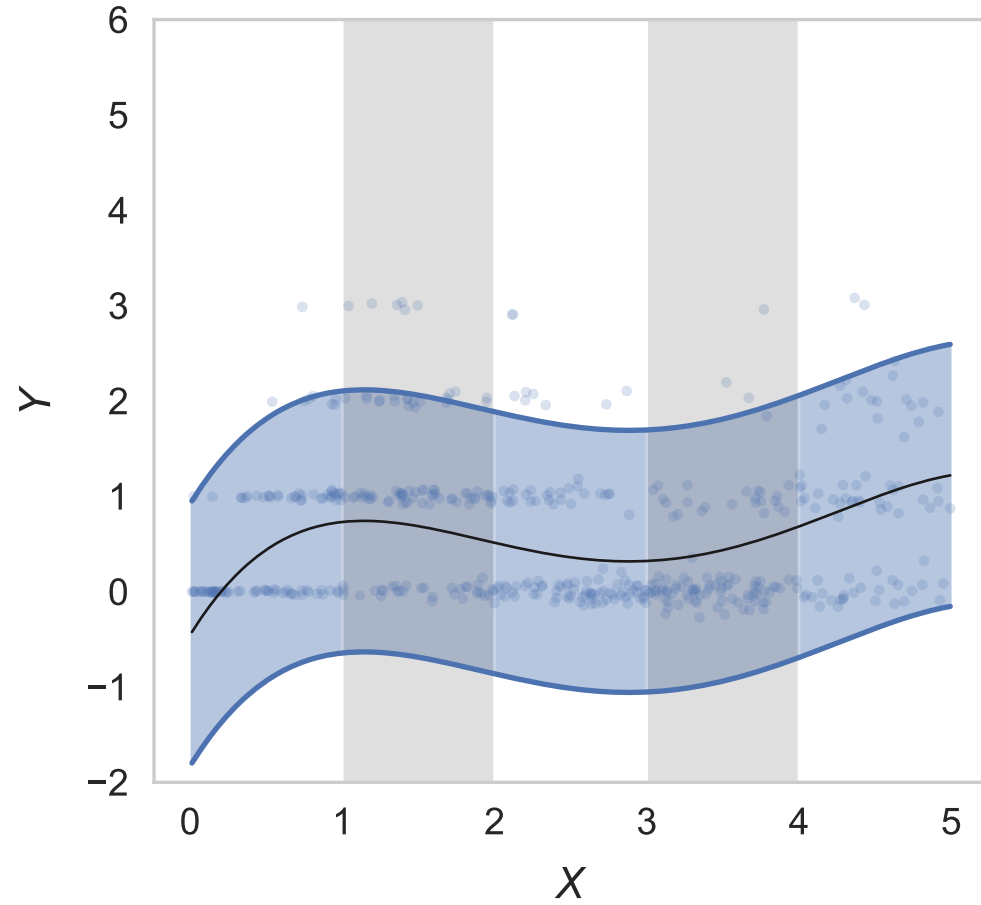

Conditional Calibration

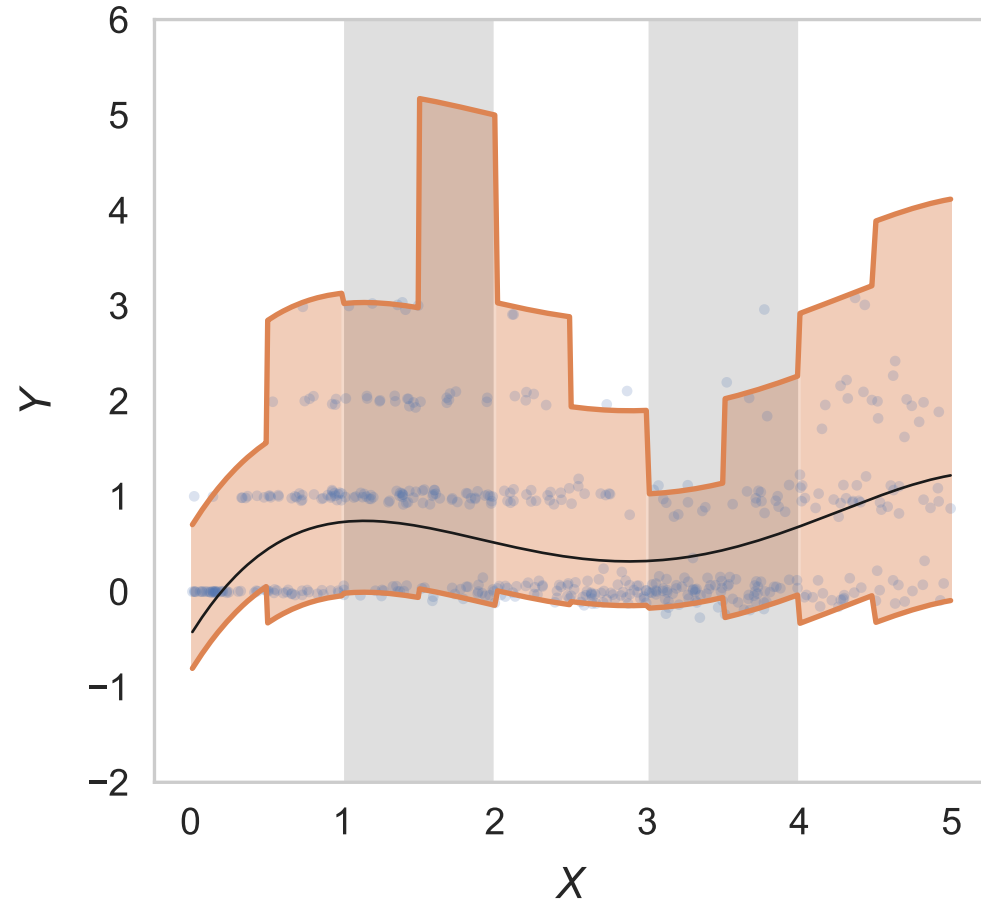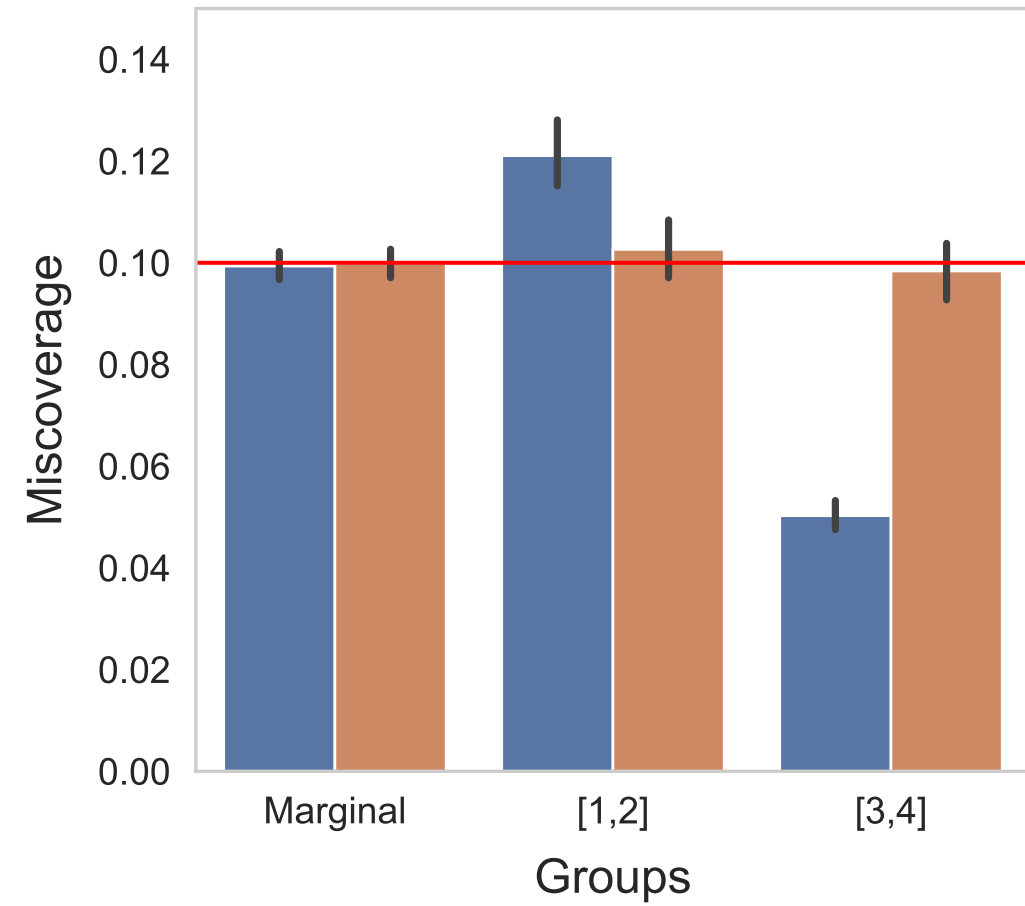

Supplement: supplementary_material [file attachment]

# Dual tracking

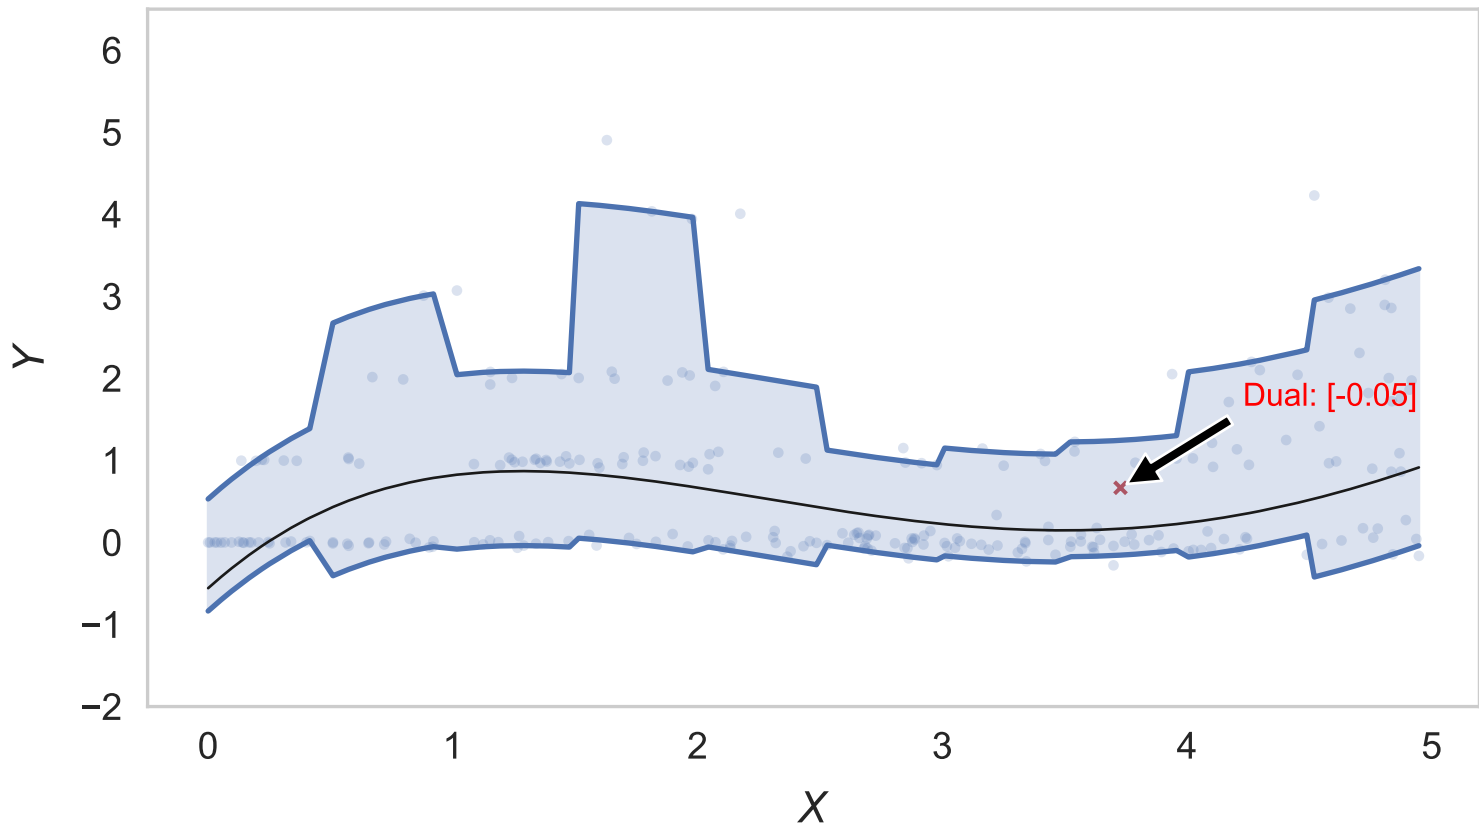

Supplement: supplementary_material [file attachment]

# Full conformal

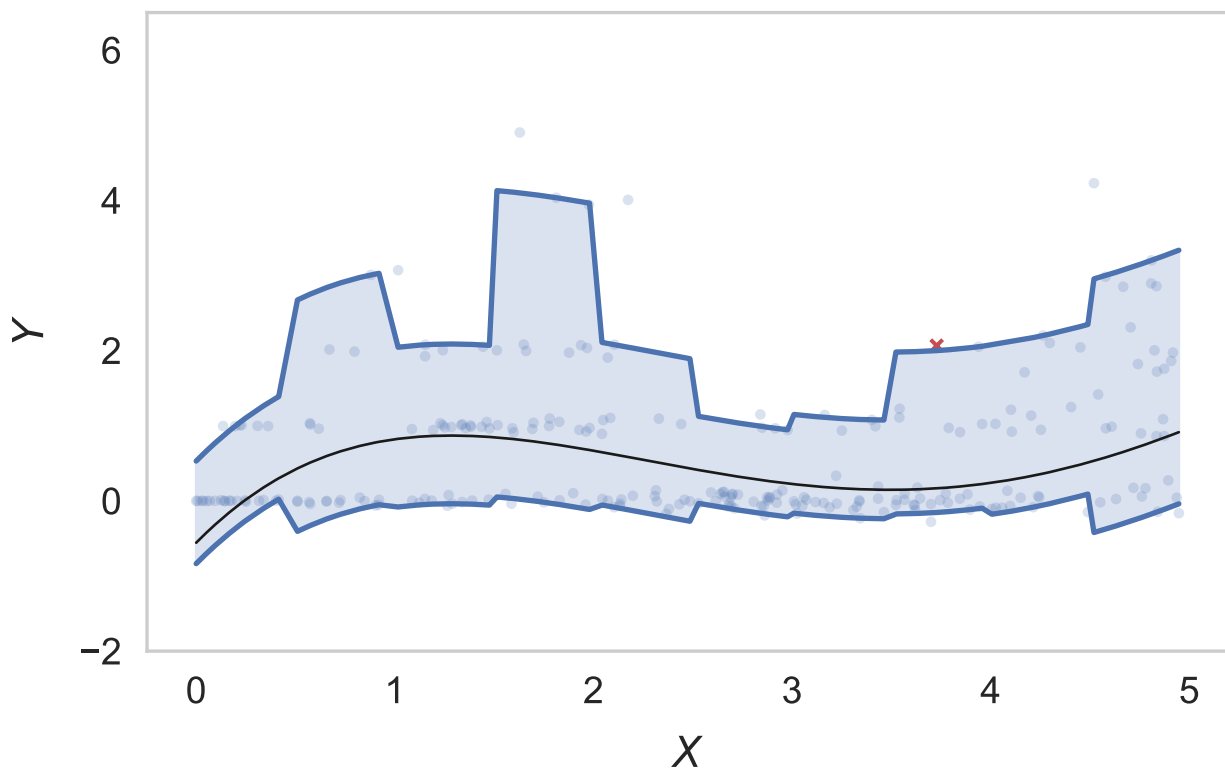

Supplement: supplementary_material [file attachment]

# Full conformal

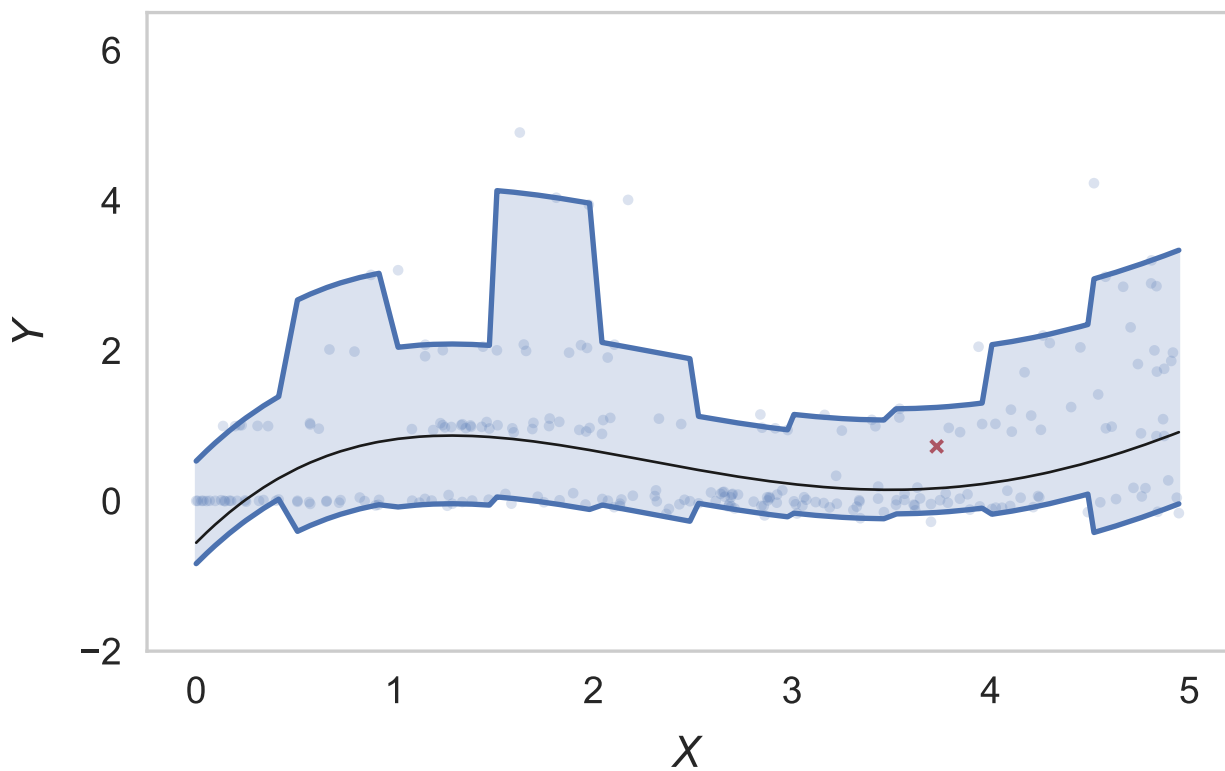

Supplement: supplementary_material [file attachment]

# Dual tracking

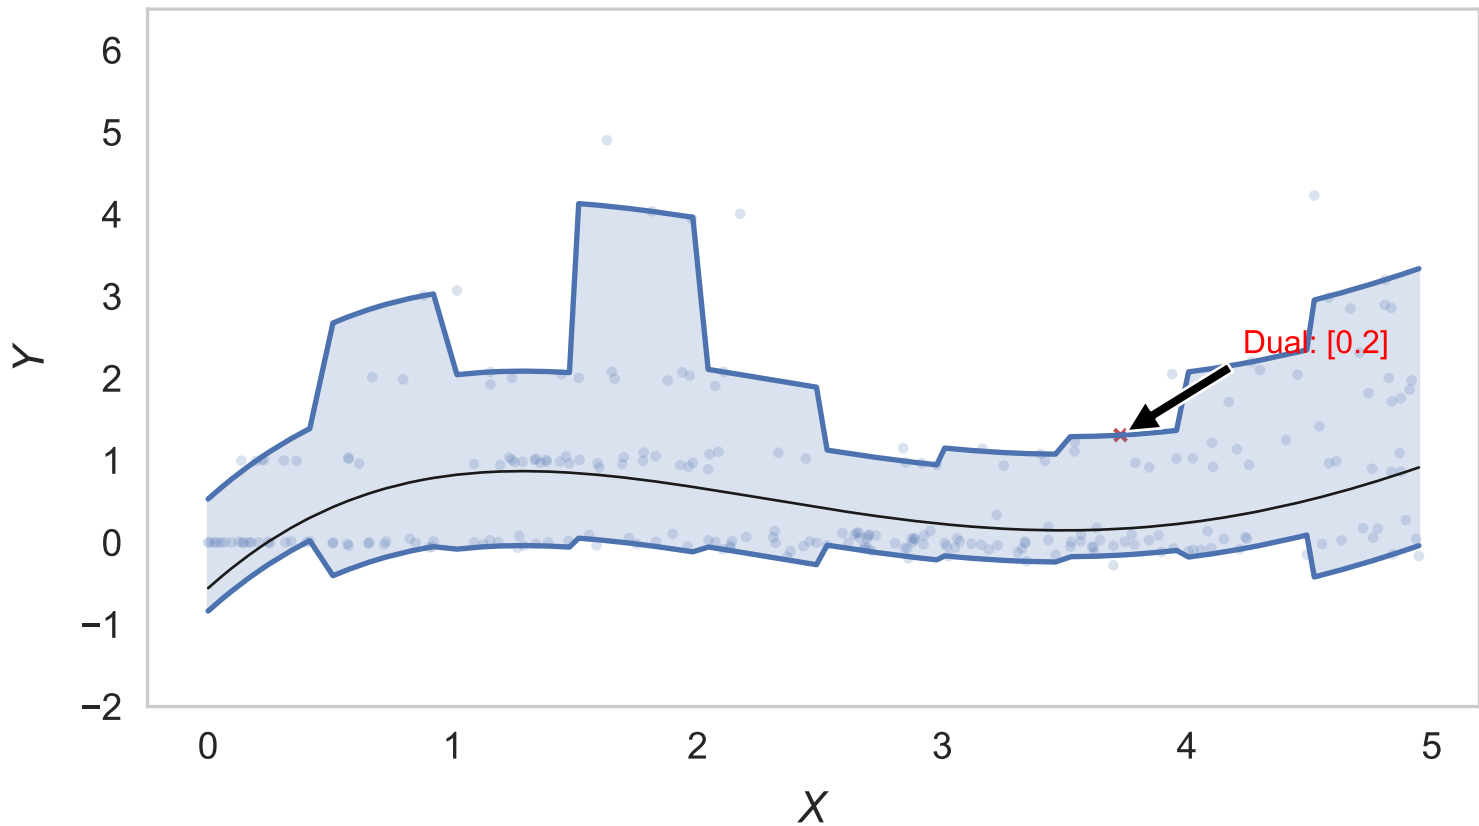

Supplement: supplementary_material [file attachment]

# Dual tracking

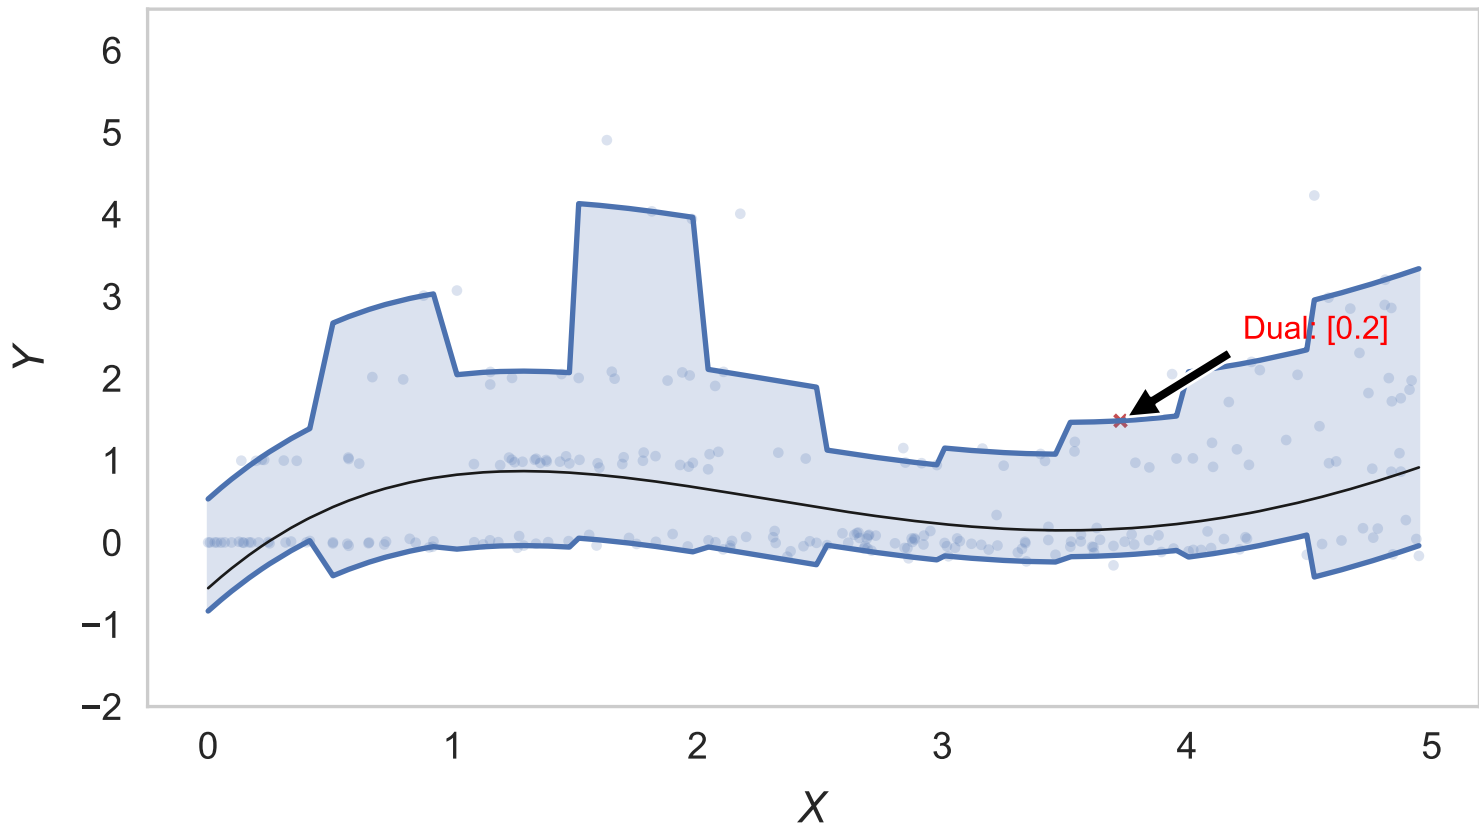

Supplement: supplementary_material [file attachment]

# Dual tracking

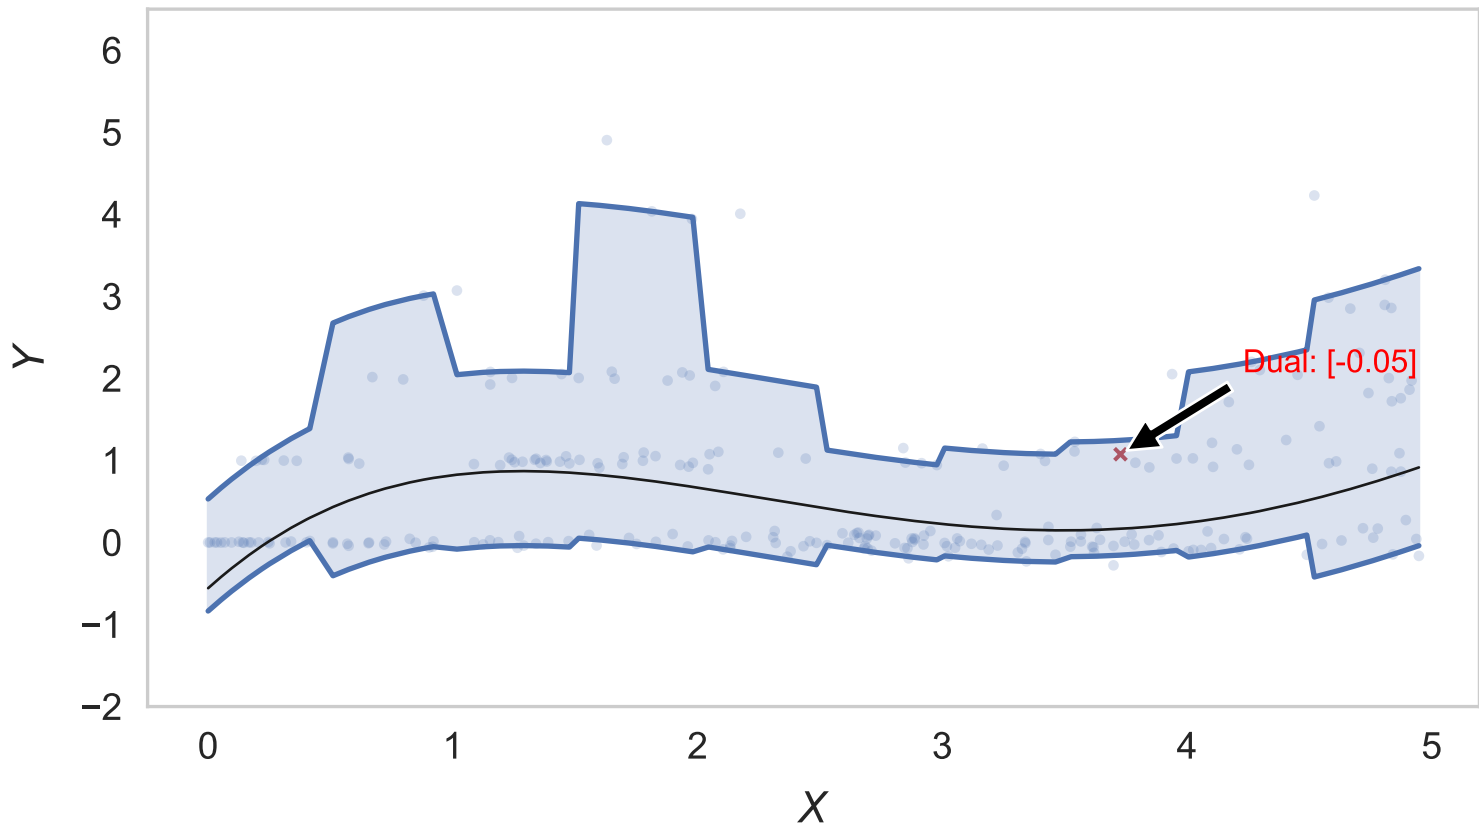

Supplement: supplementary_material [file attachment]

Conditional Calibration

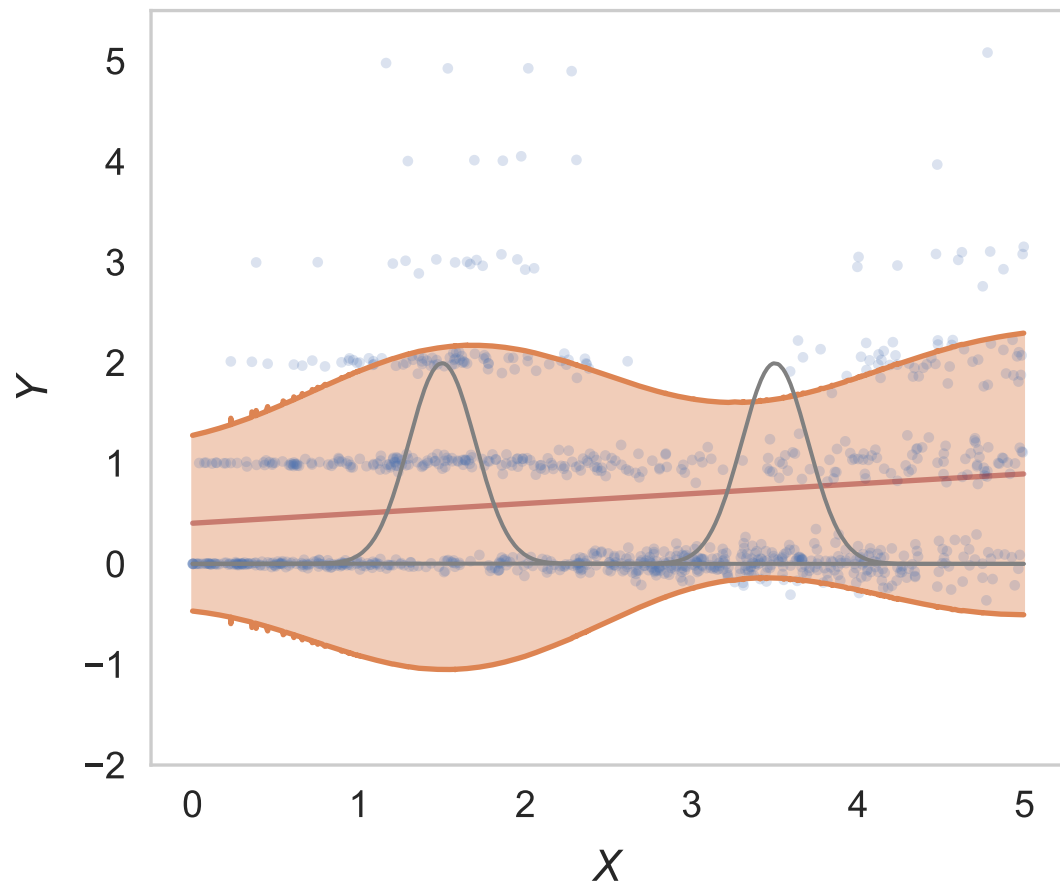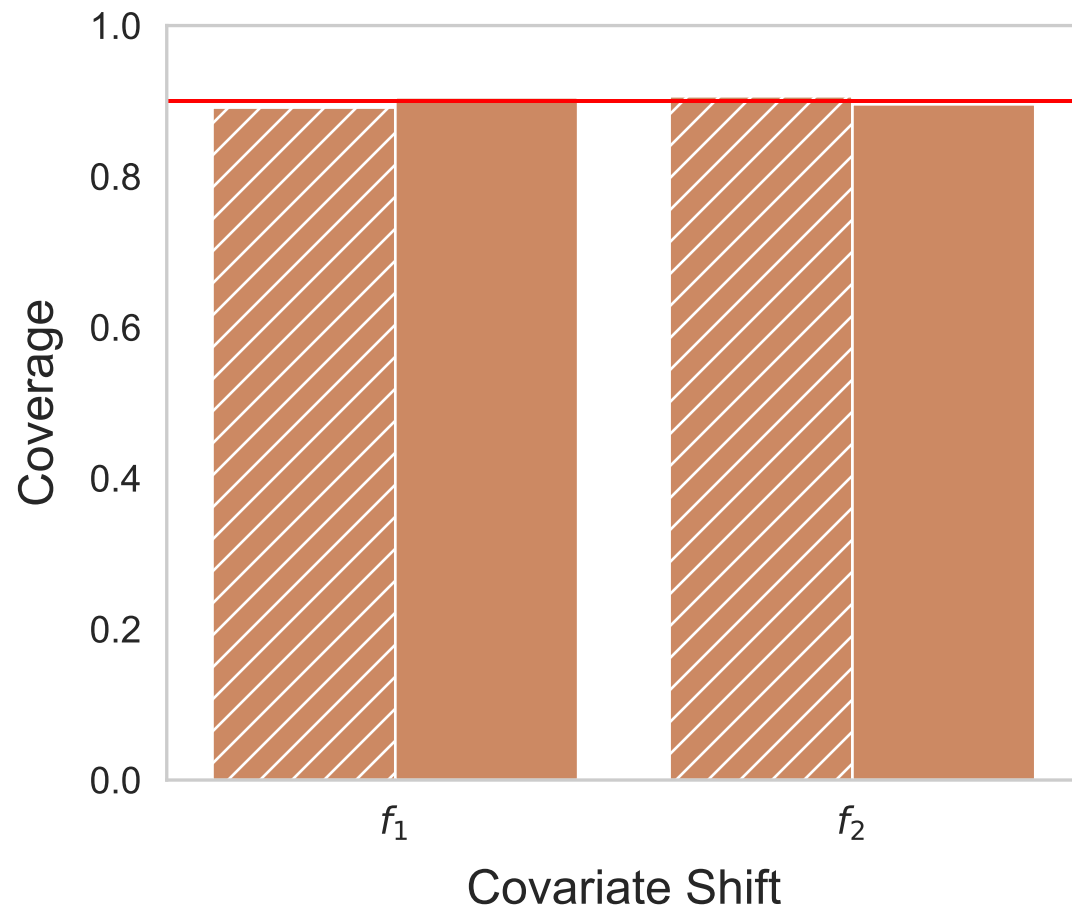

Supplement: supplementary_material [file attachment]

# Full conformal

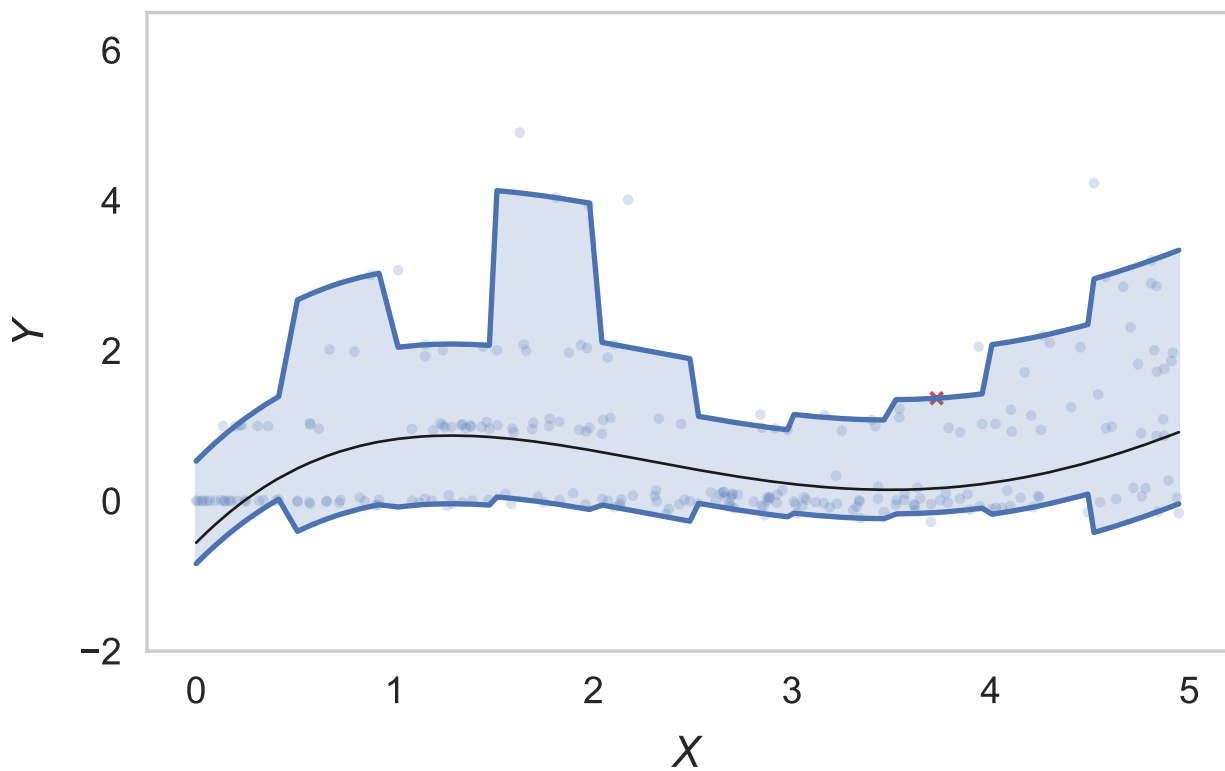

Supplement: supplementary_material [file attachment]

# Full conformal

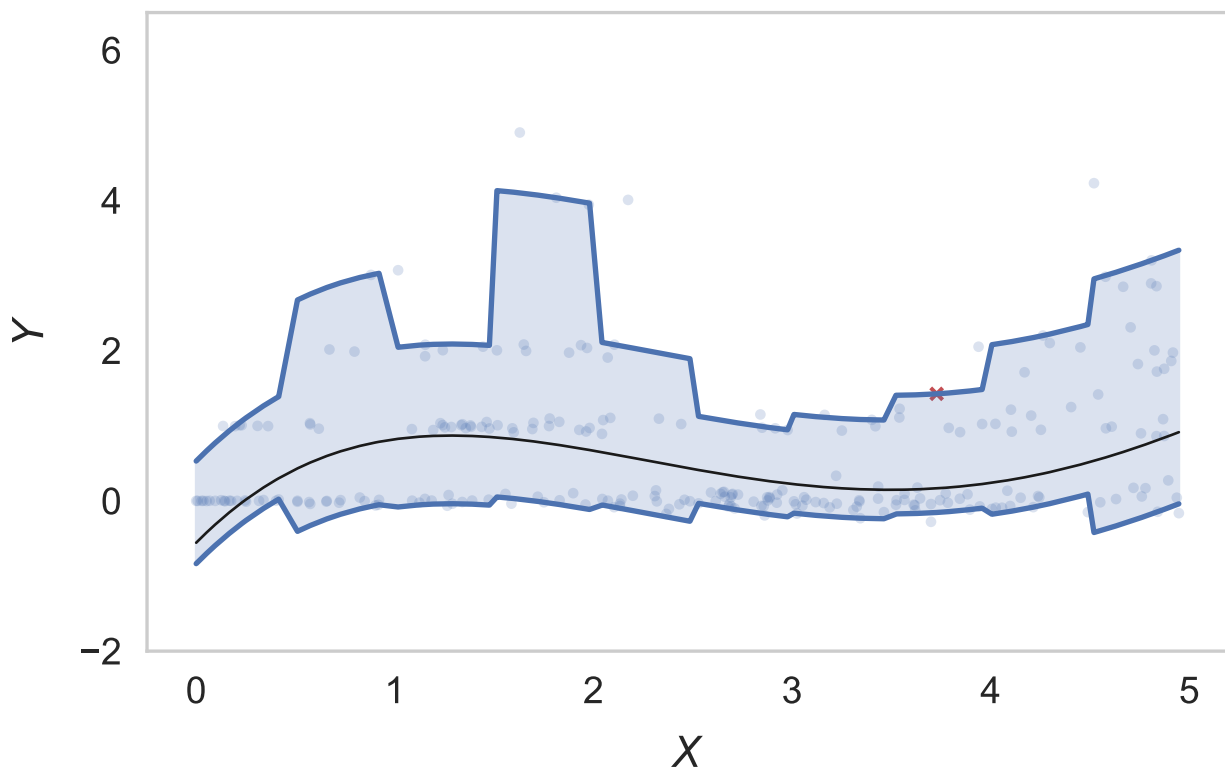

Supplement: supplementary_material [file attachment]

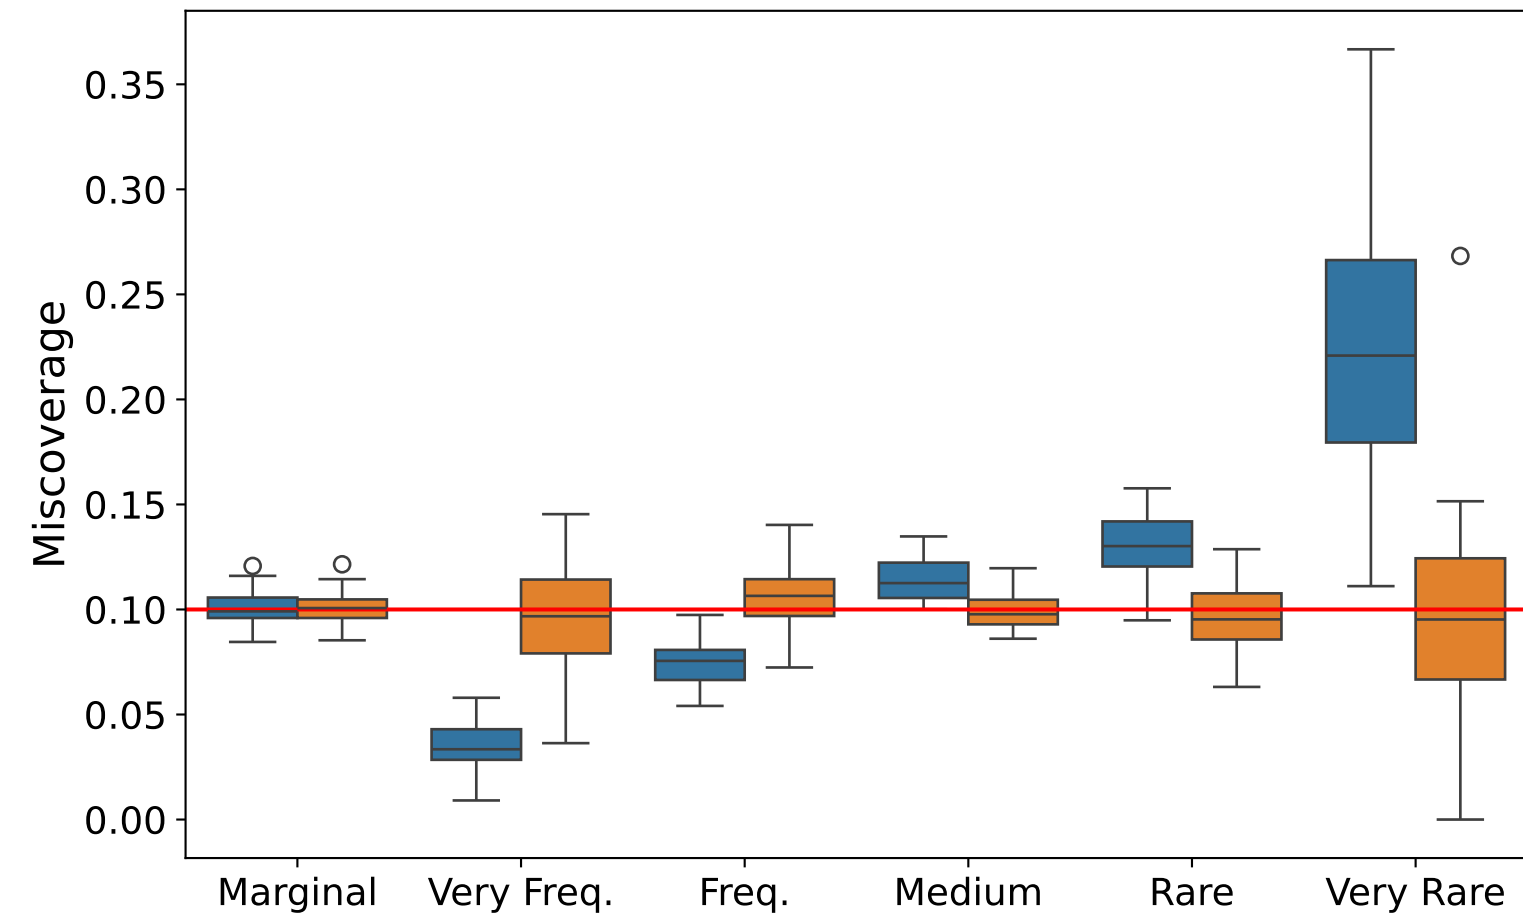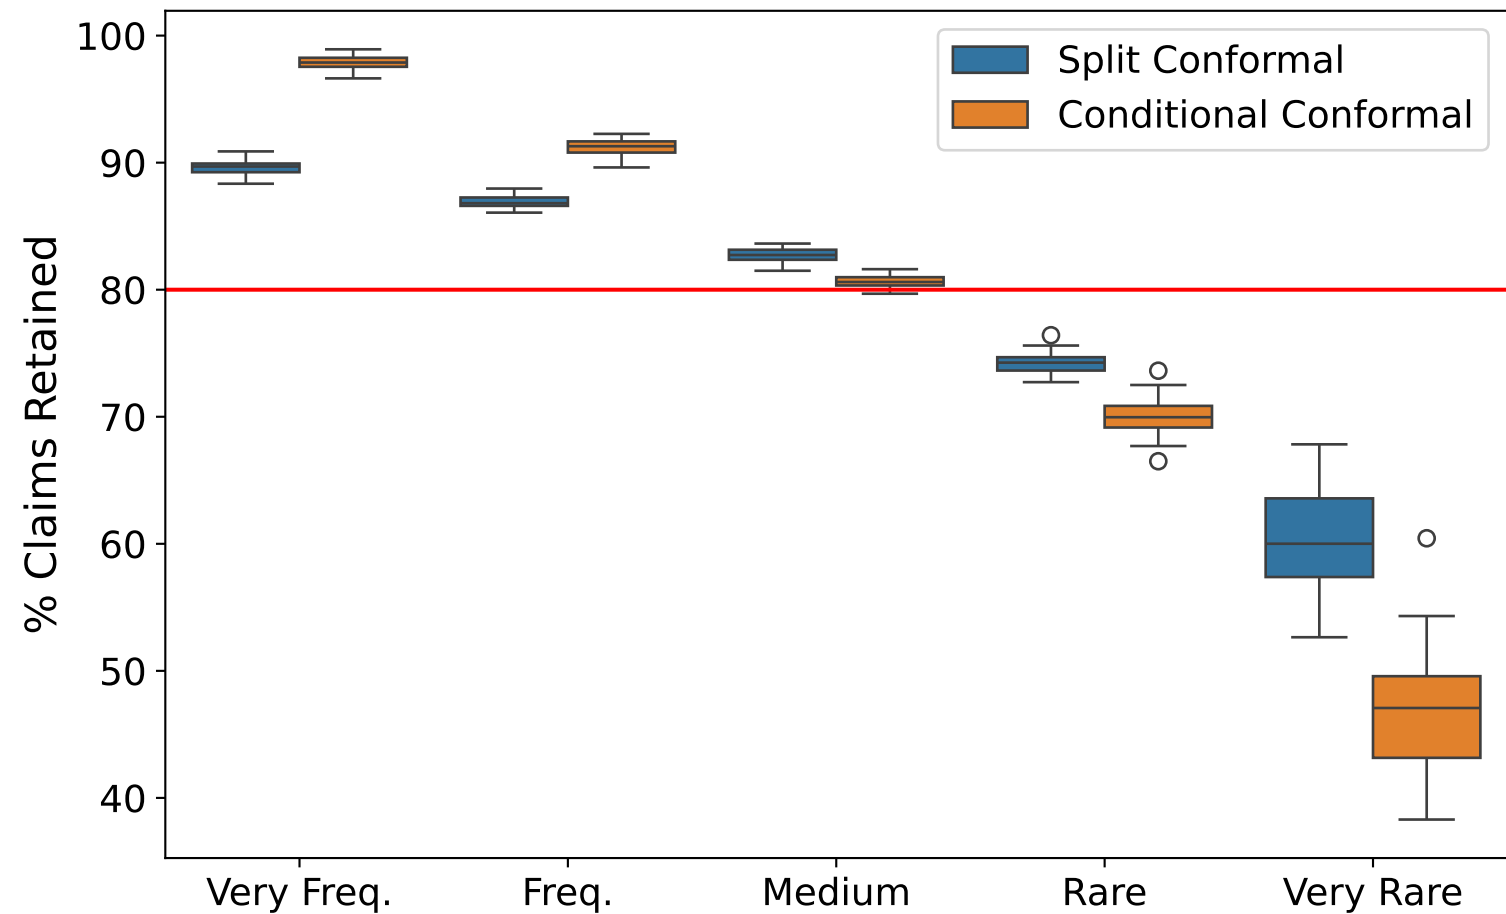

Supplement: supplementary_material [file attachment]

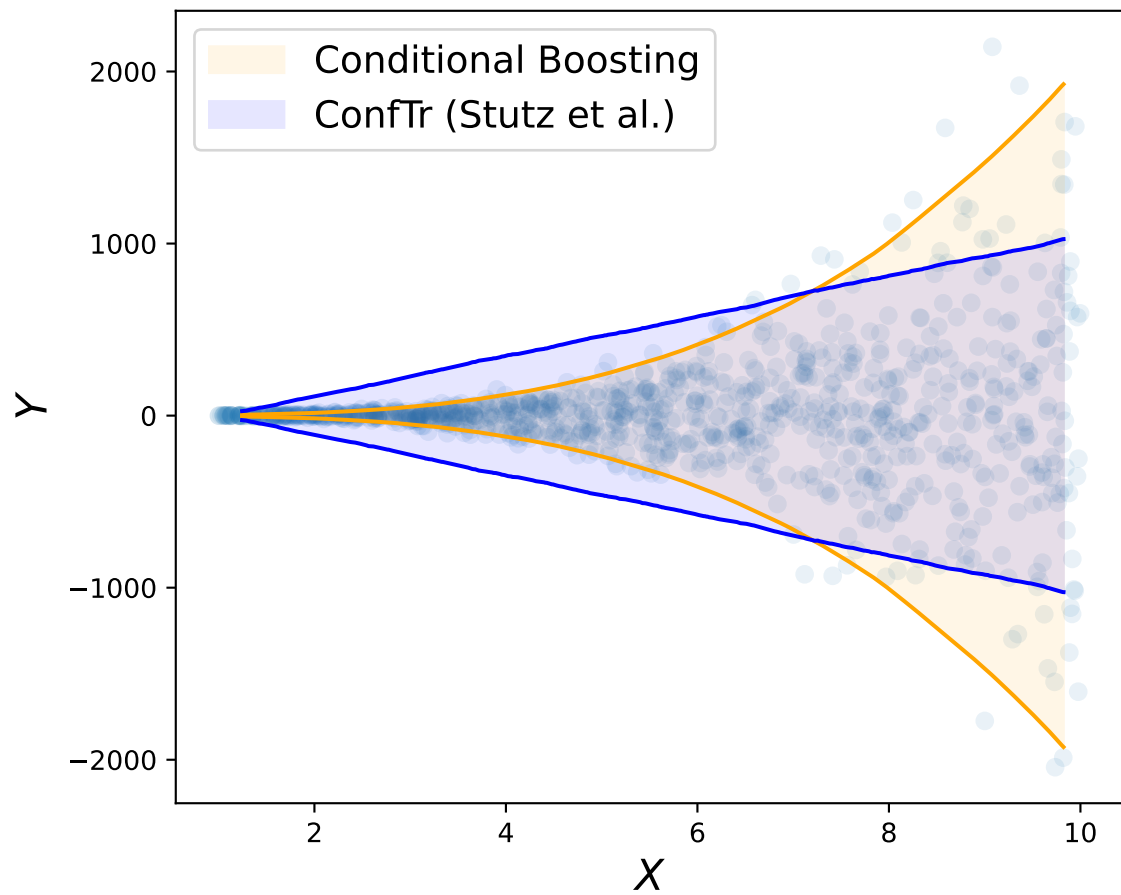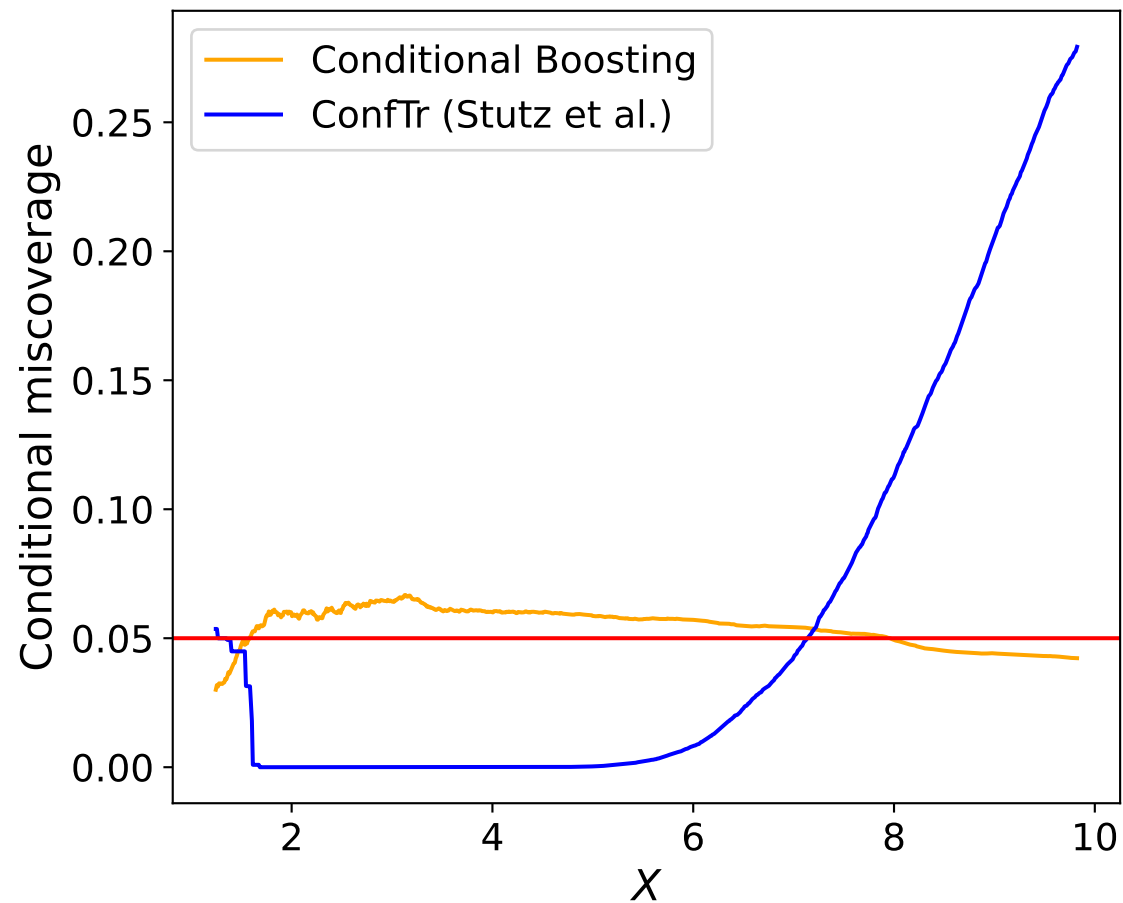

Supplement: supplementary_material [file attachment]

# Dual tracking

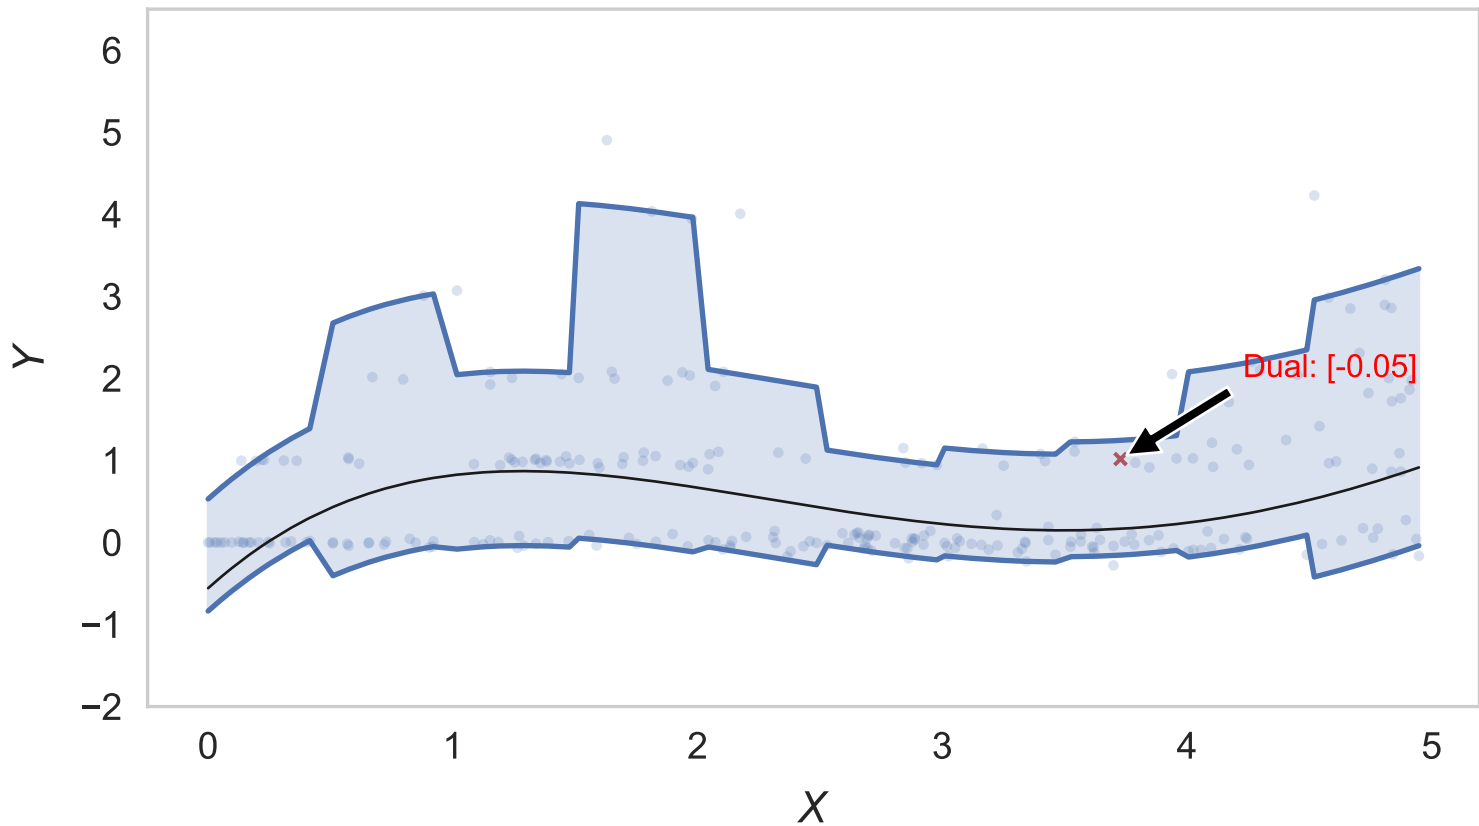

Supplement: supplementary_material [file attachment]

# Full conformal

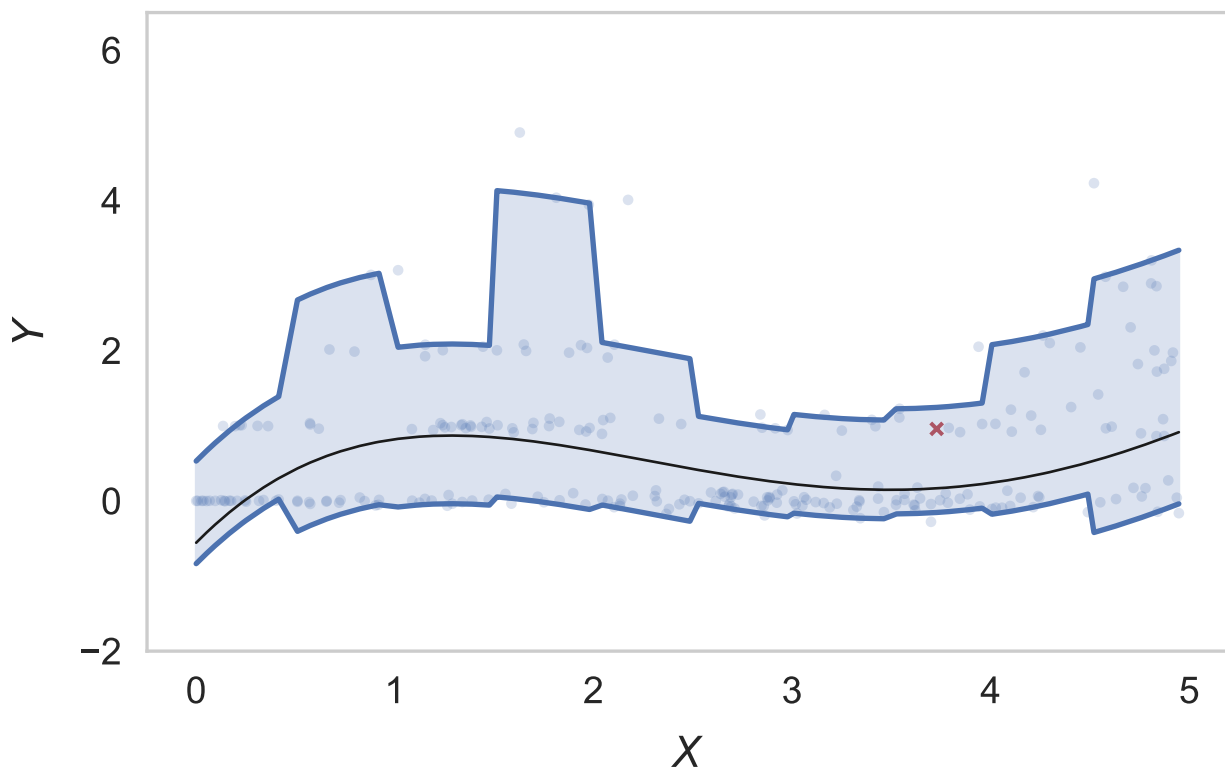

Supplement: supplementary_material [file attachment]

# Dual tracking

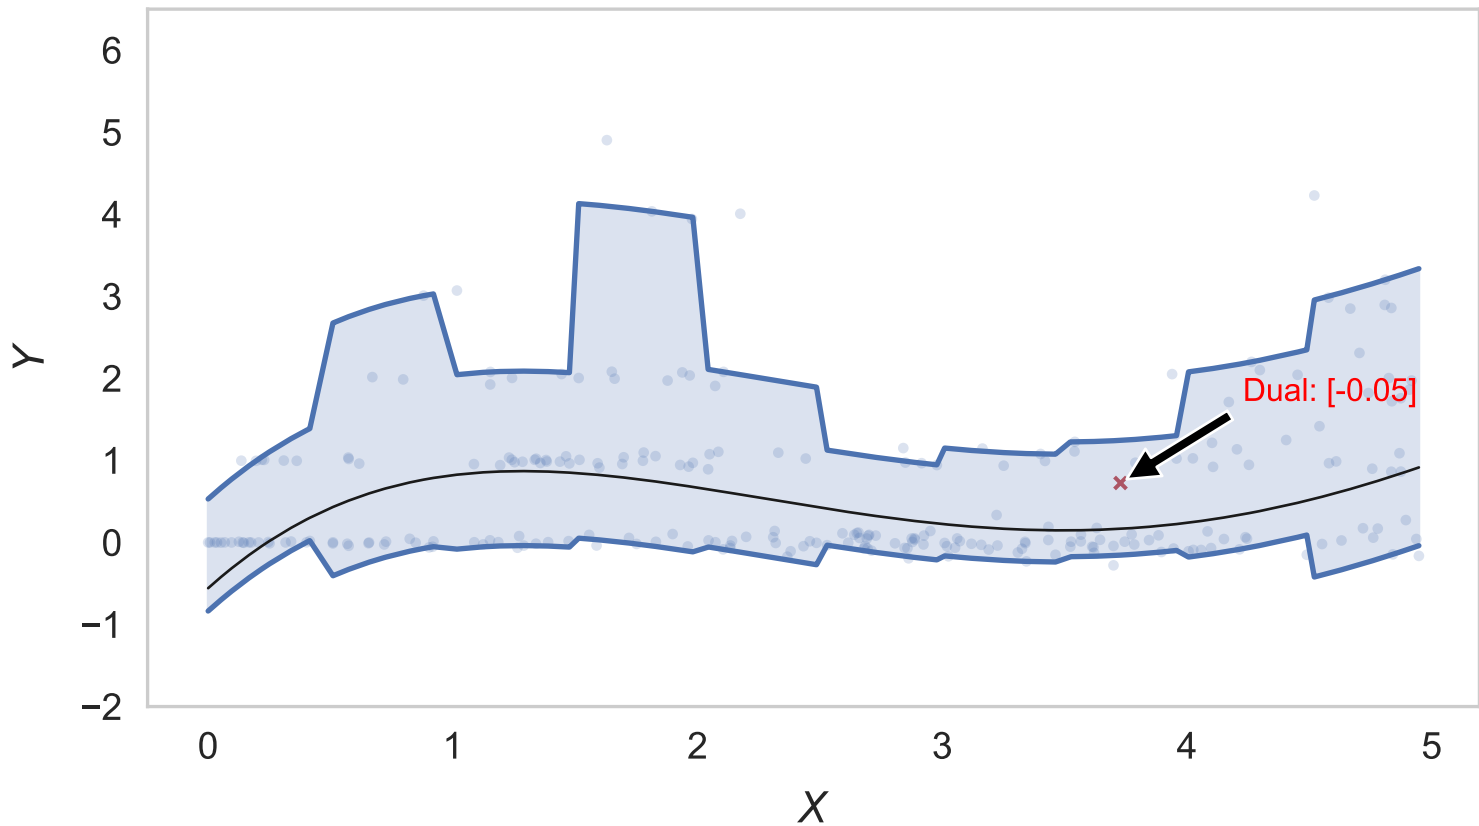

Supplement: supplementary_material [file attachment]

Split Conformal

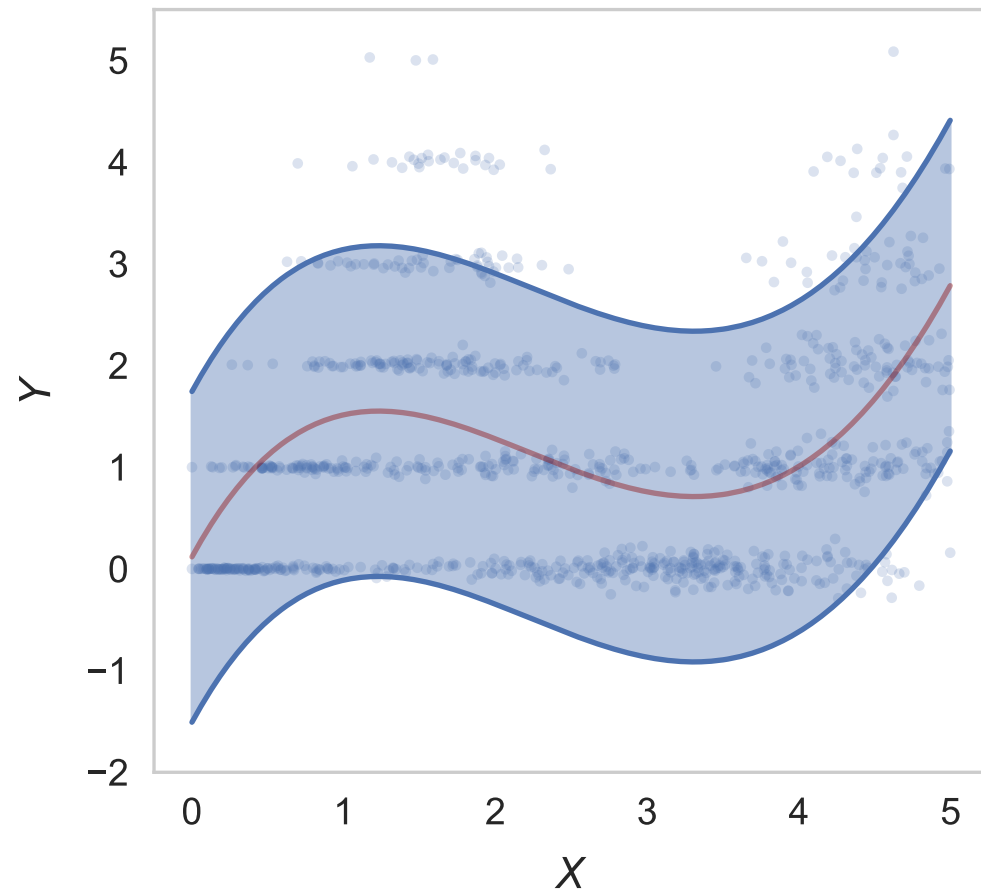

Our Method

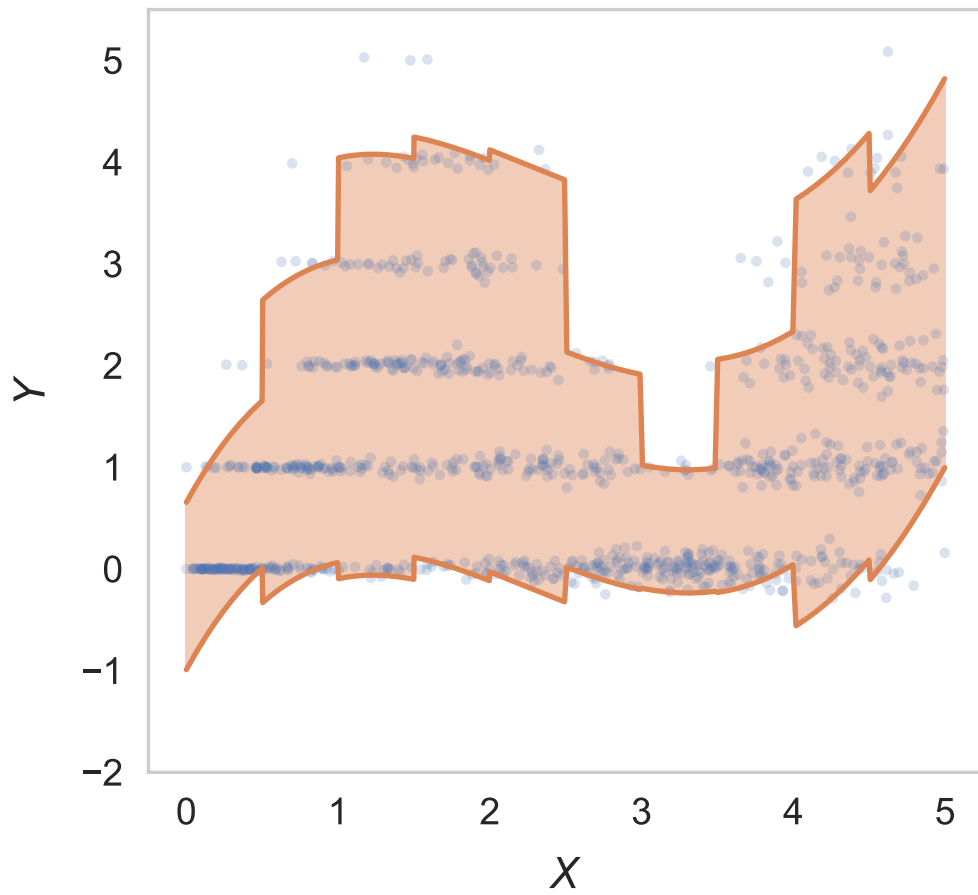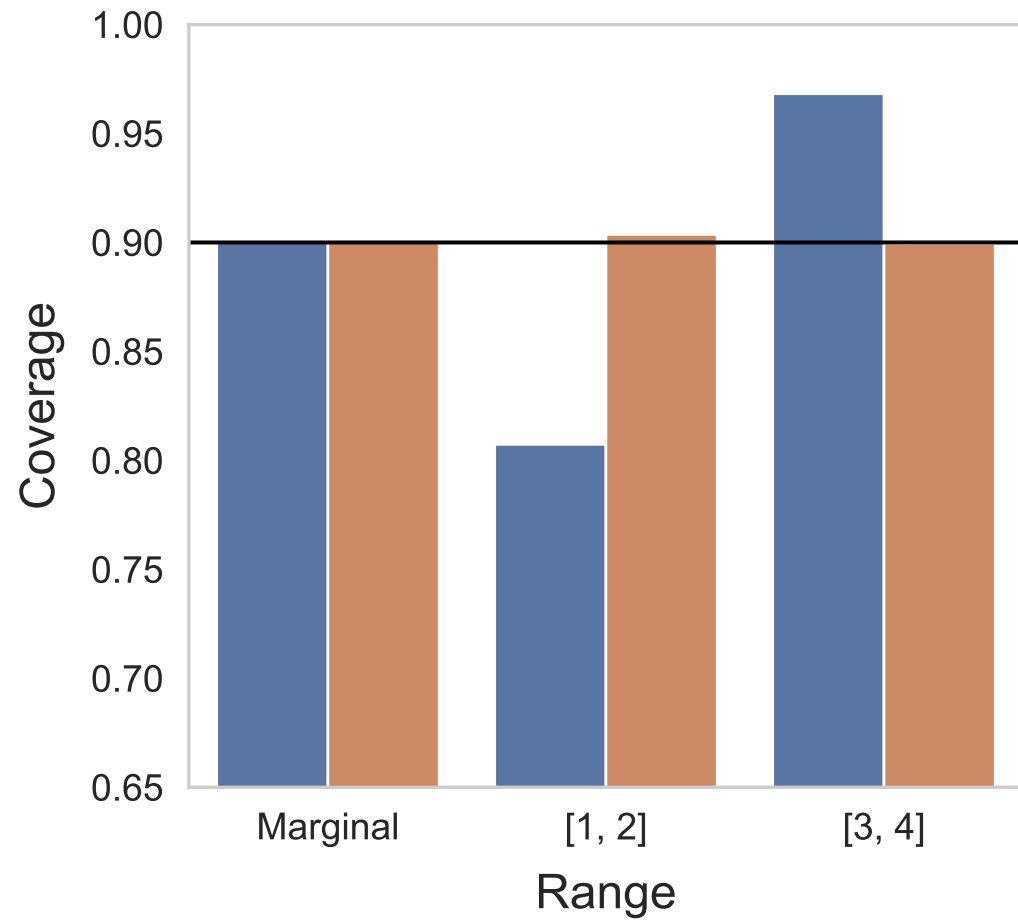

Supplement: supplementary_material [file attachment]

# Dual tracking

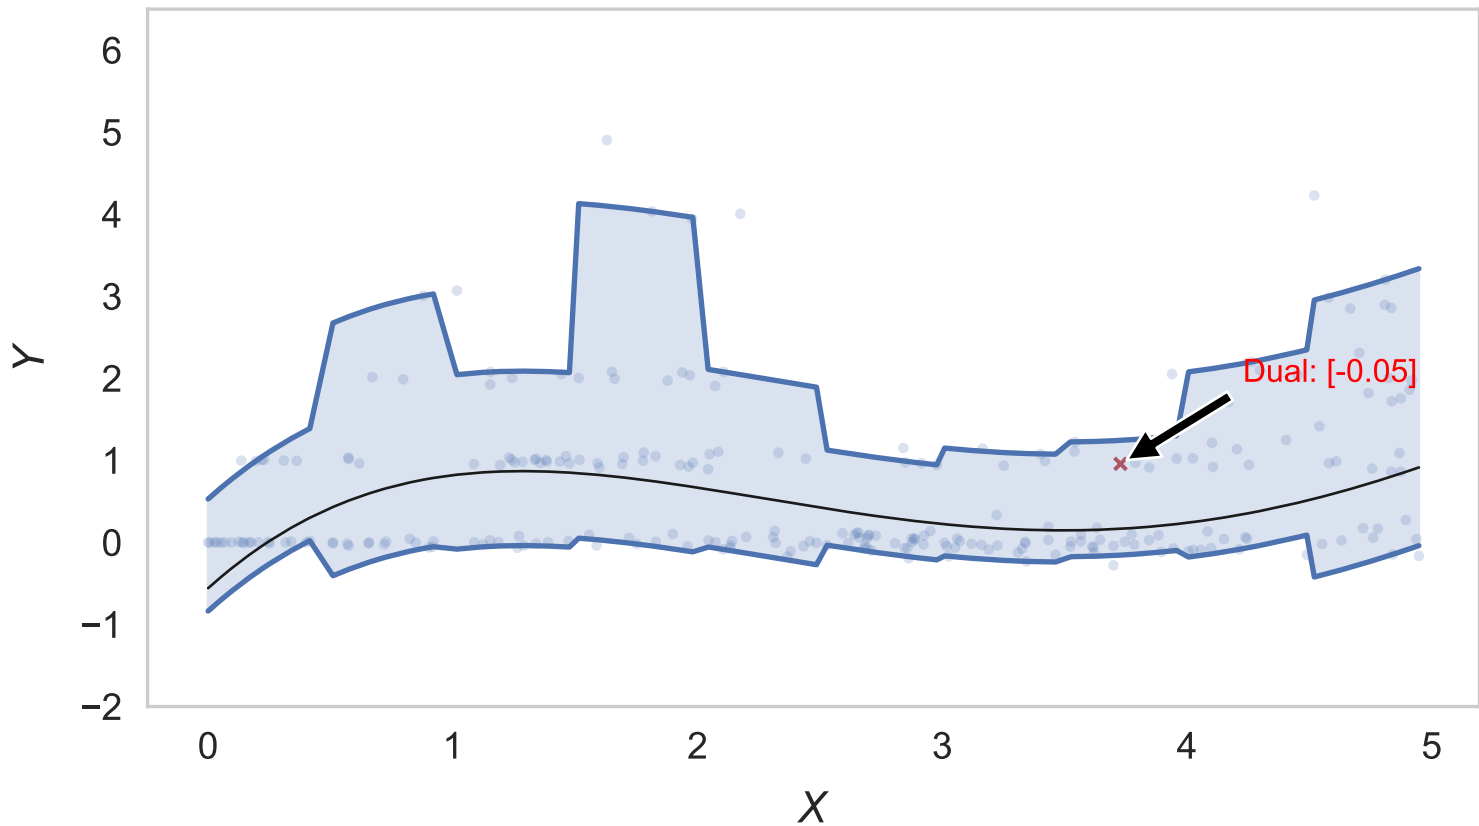

Supplement: supplementary_material [file attachment]

# Full conformal

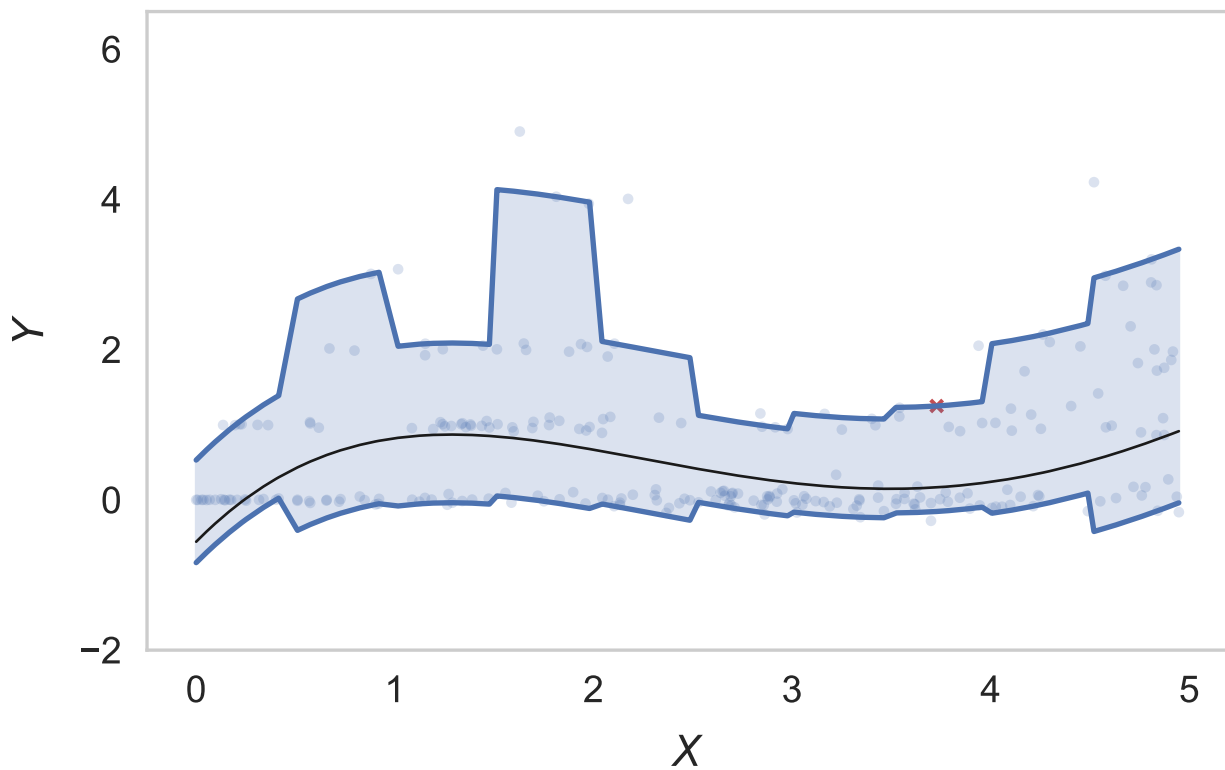

Supplement: supplementary_material [file attachment]

# Full conformal

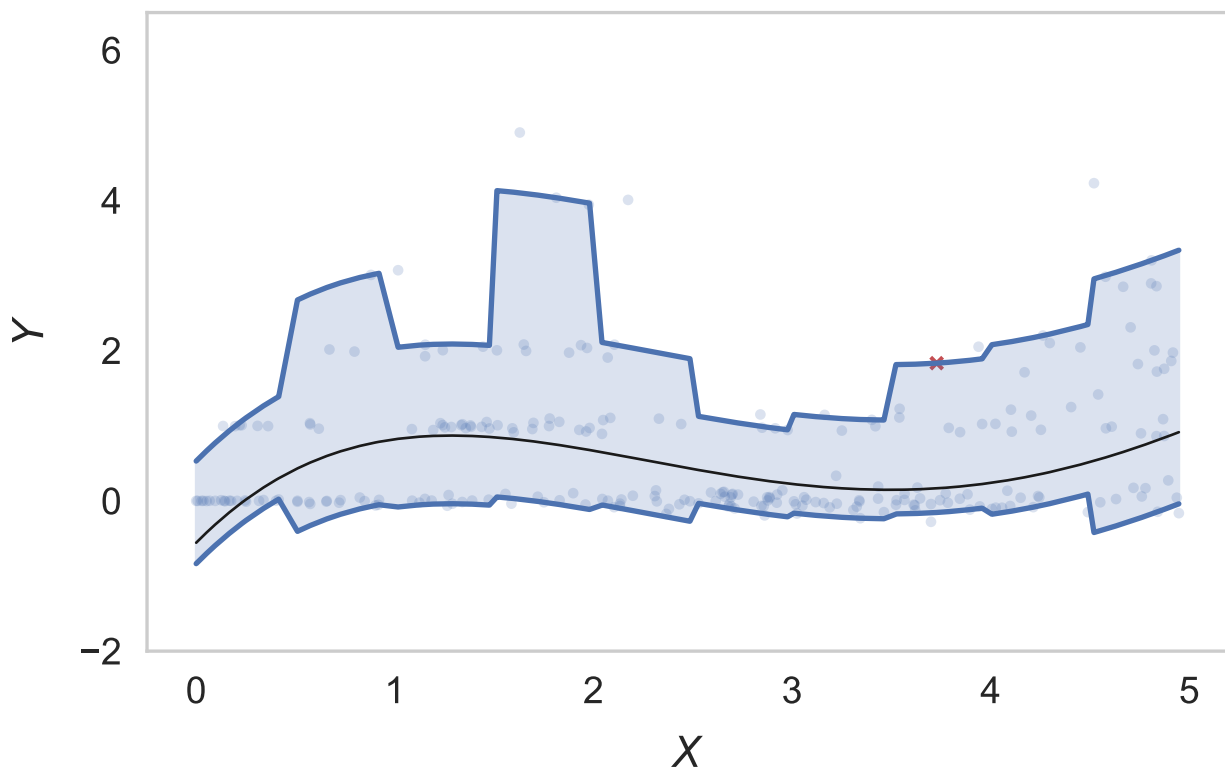

Supplement: supplementary_material [file attachment]

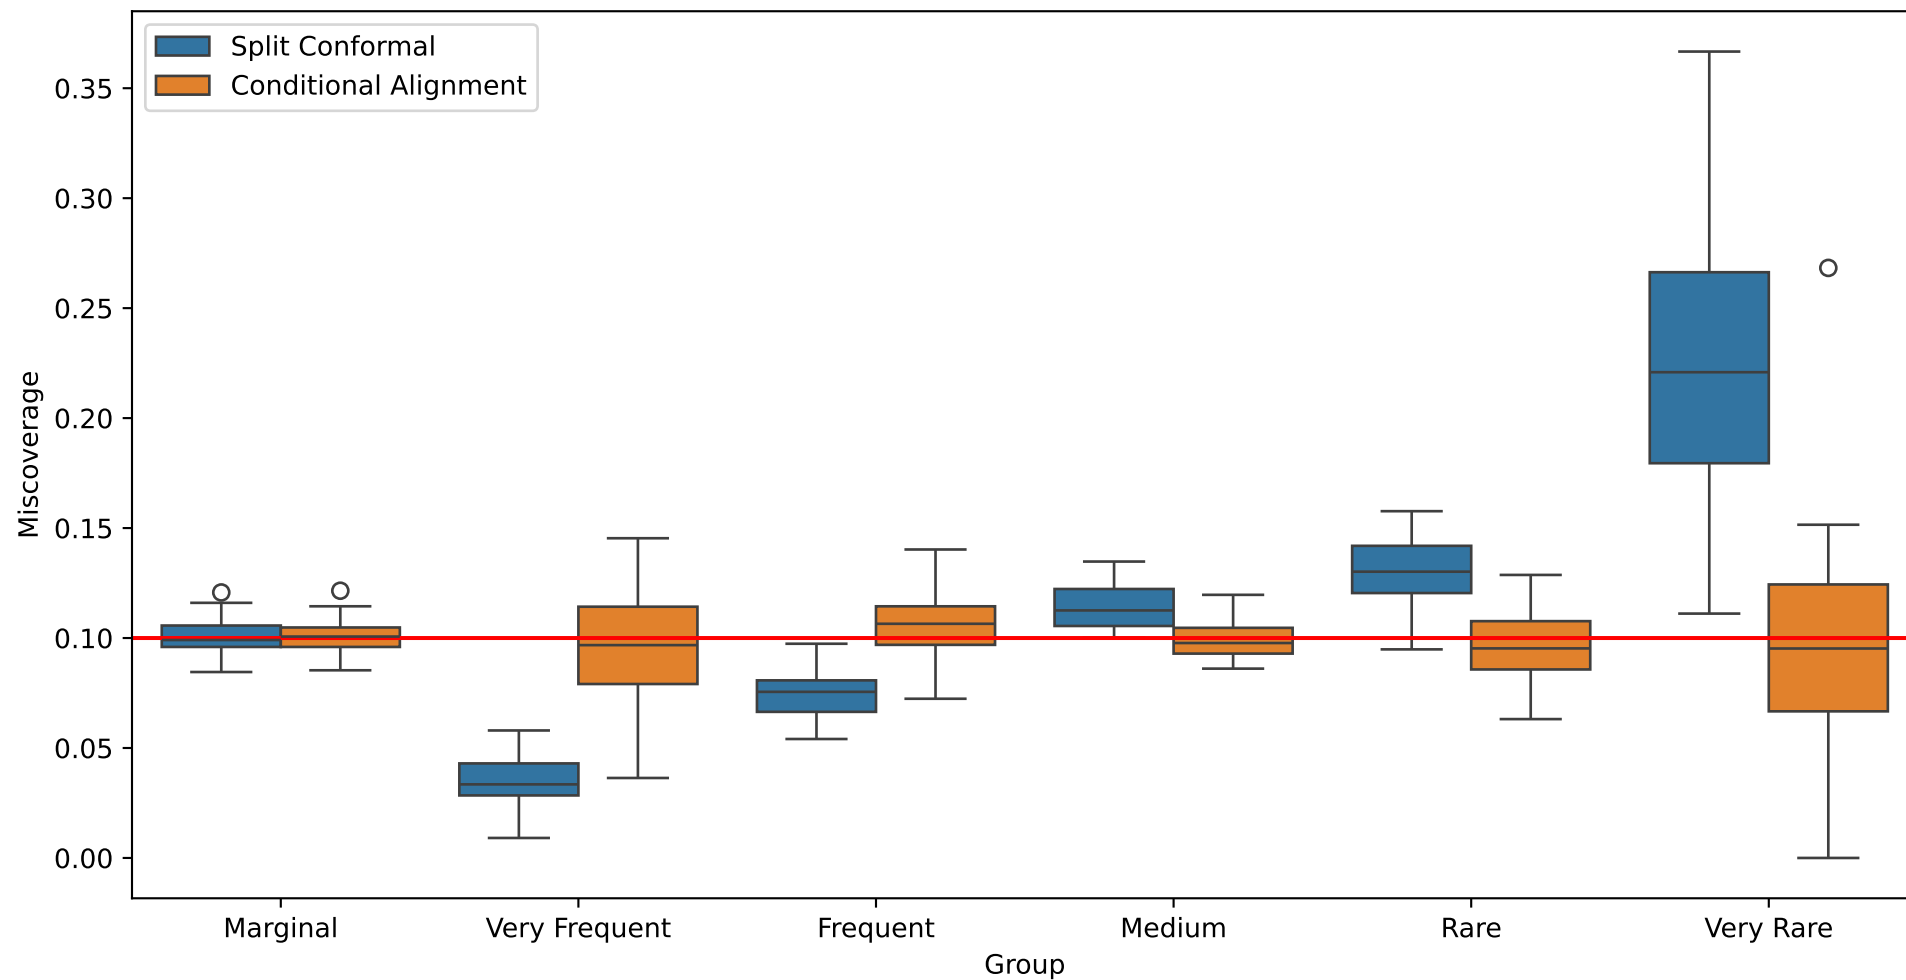

Supplement: supplementary_material [file attachment]

# Dual tracking

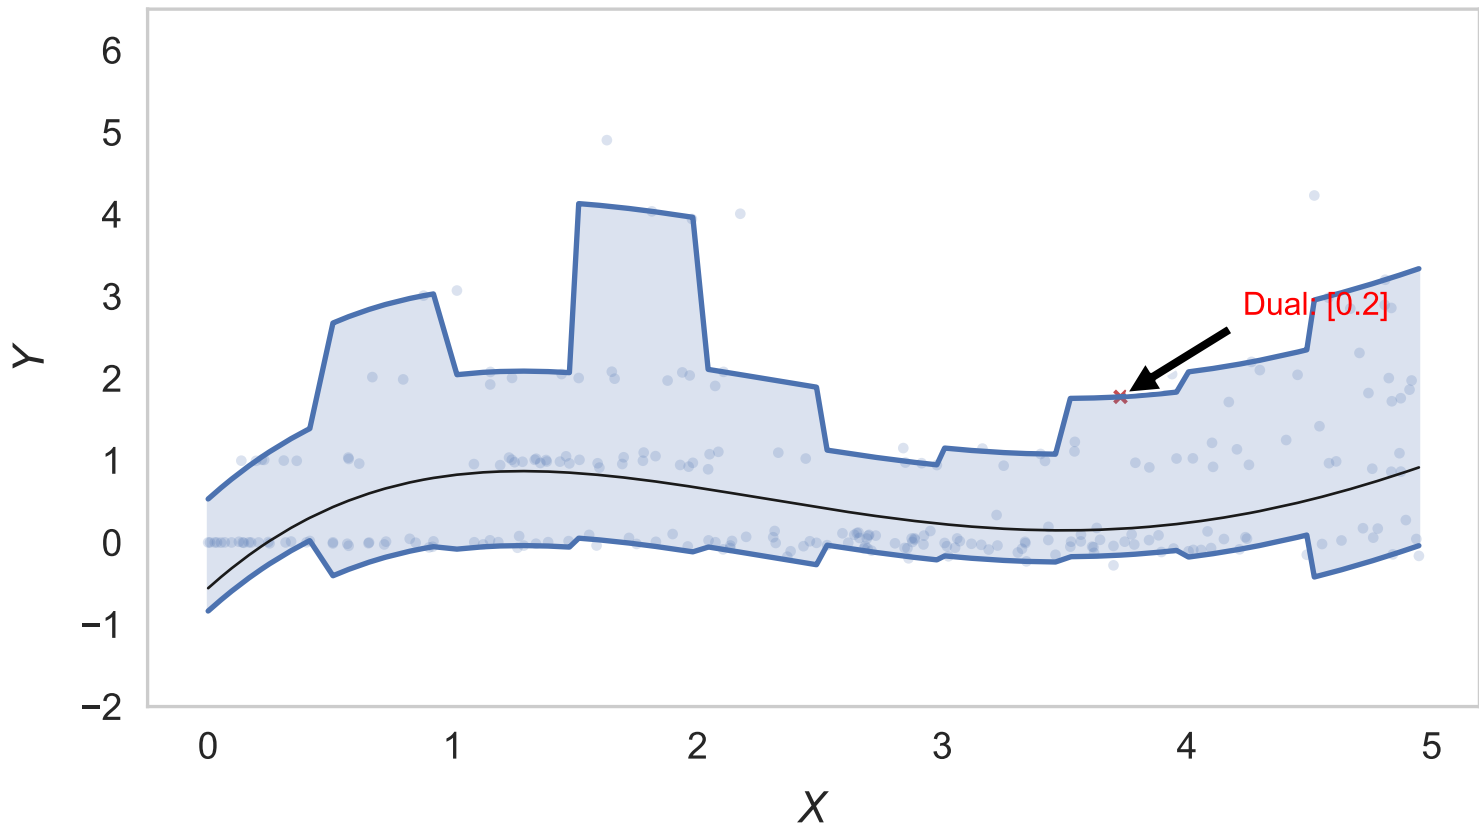

Supplement: supplementary_material [file attachment]

# Dual tracking

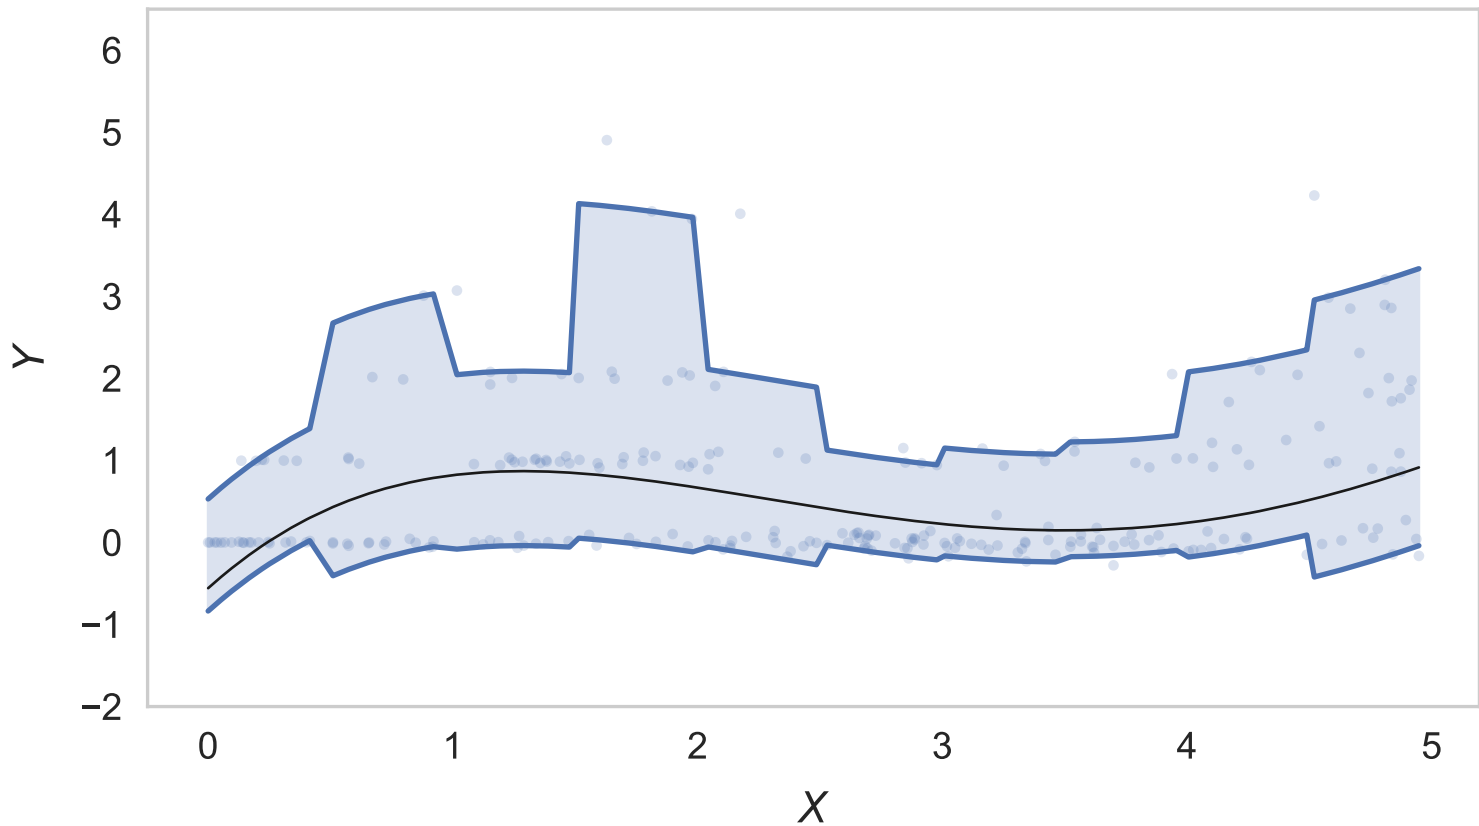

Supplement: supplementary_material [file attachment]

# Full conformal

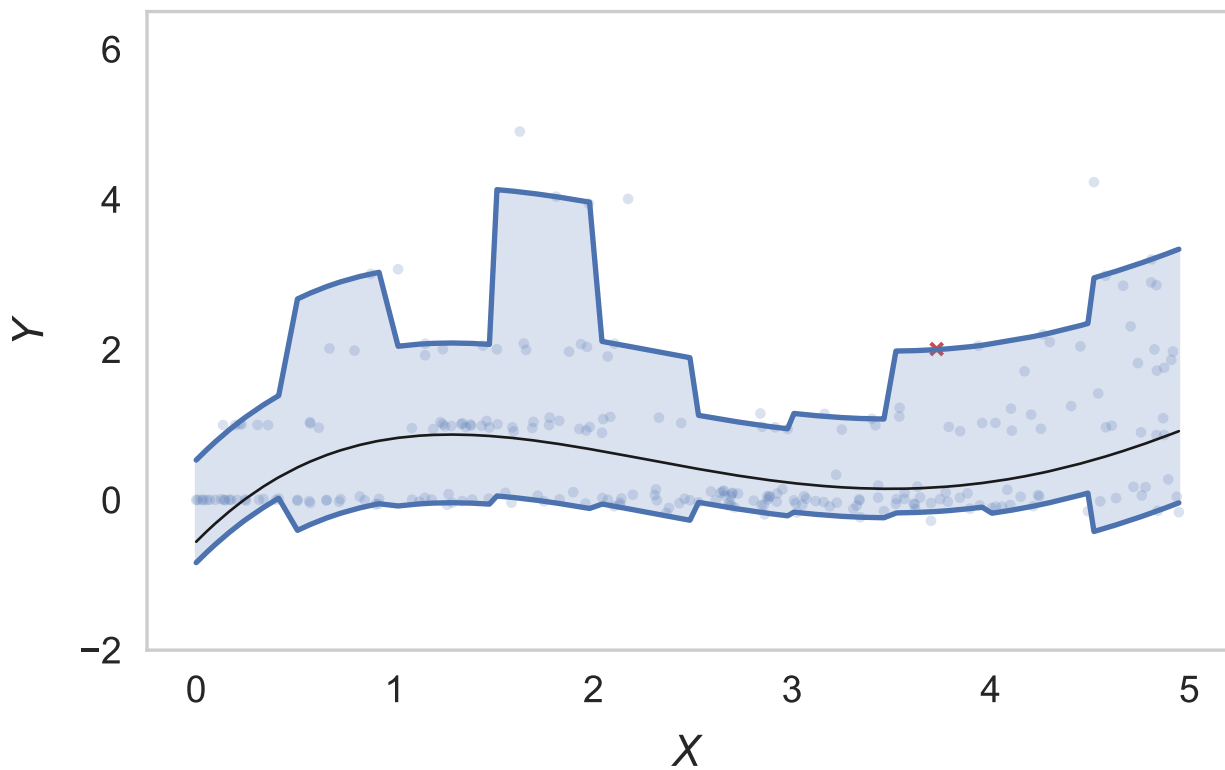

Supplement: supplementary_material [file attachment]

# Dual tracking

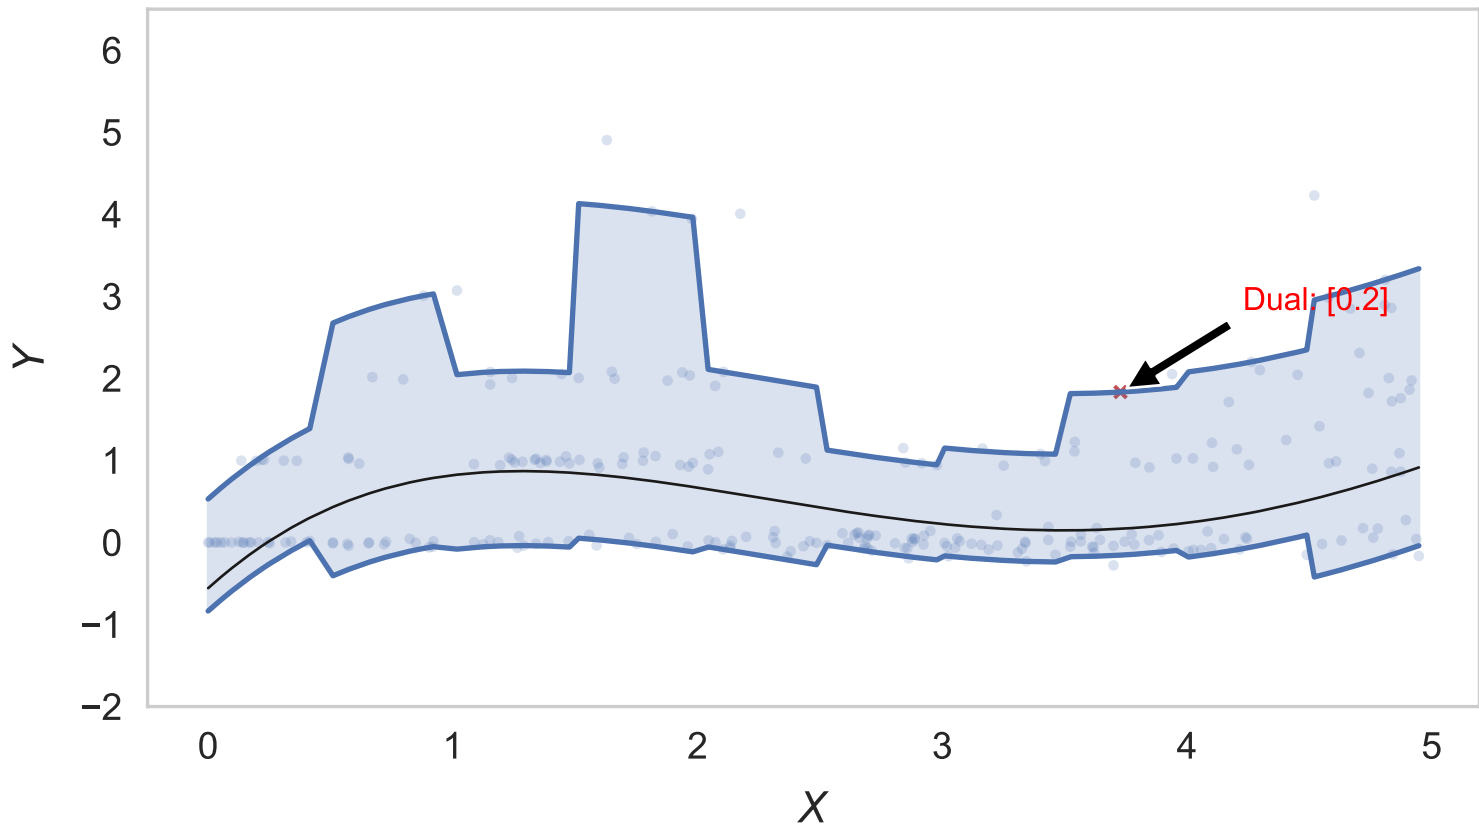

Supplement: supplementary_material [file attachment]

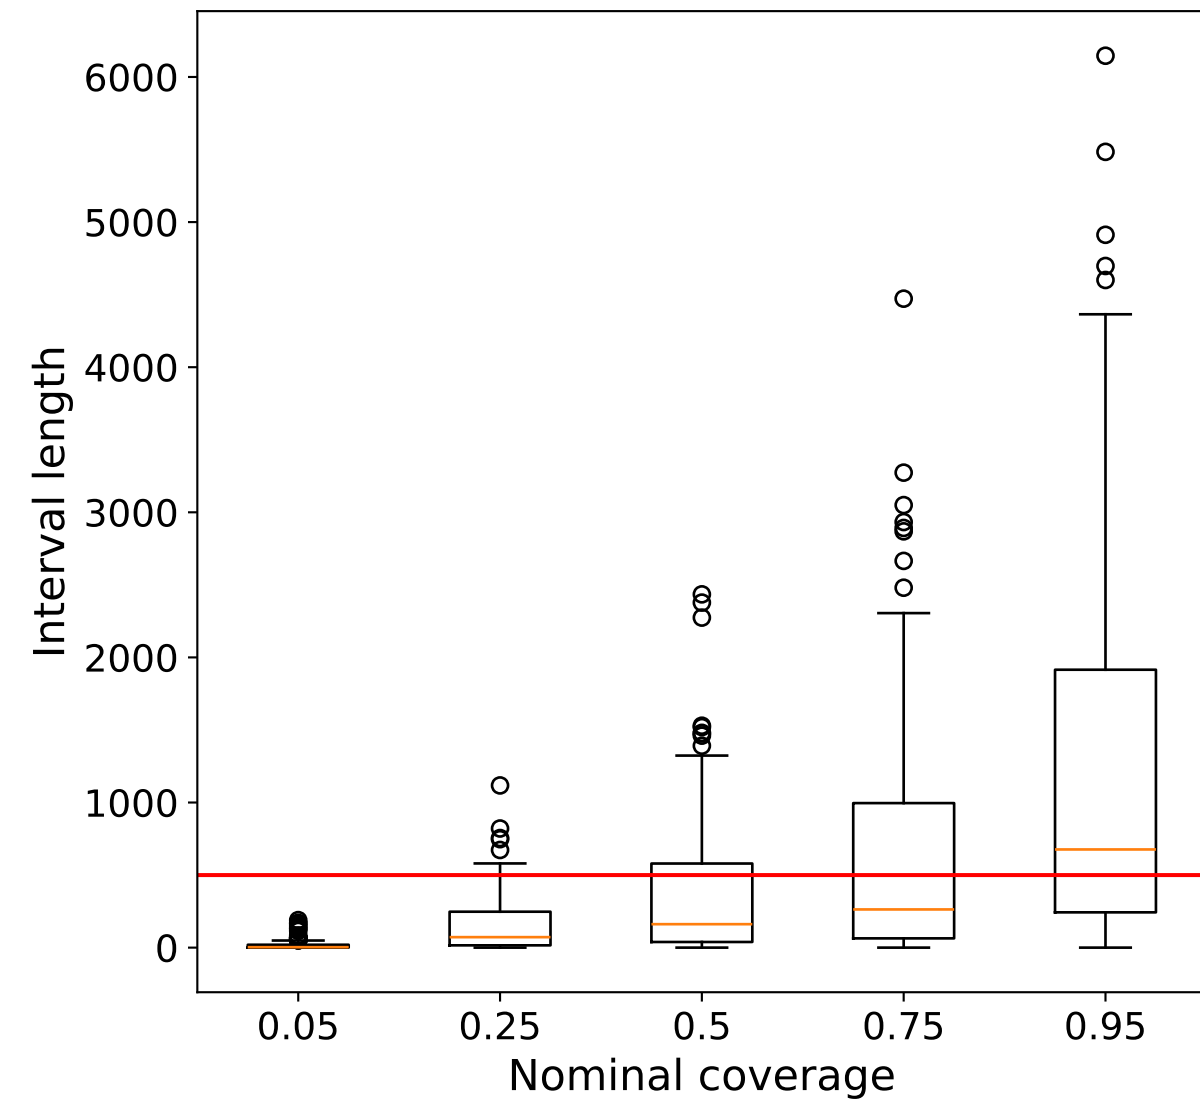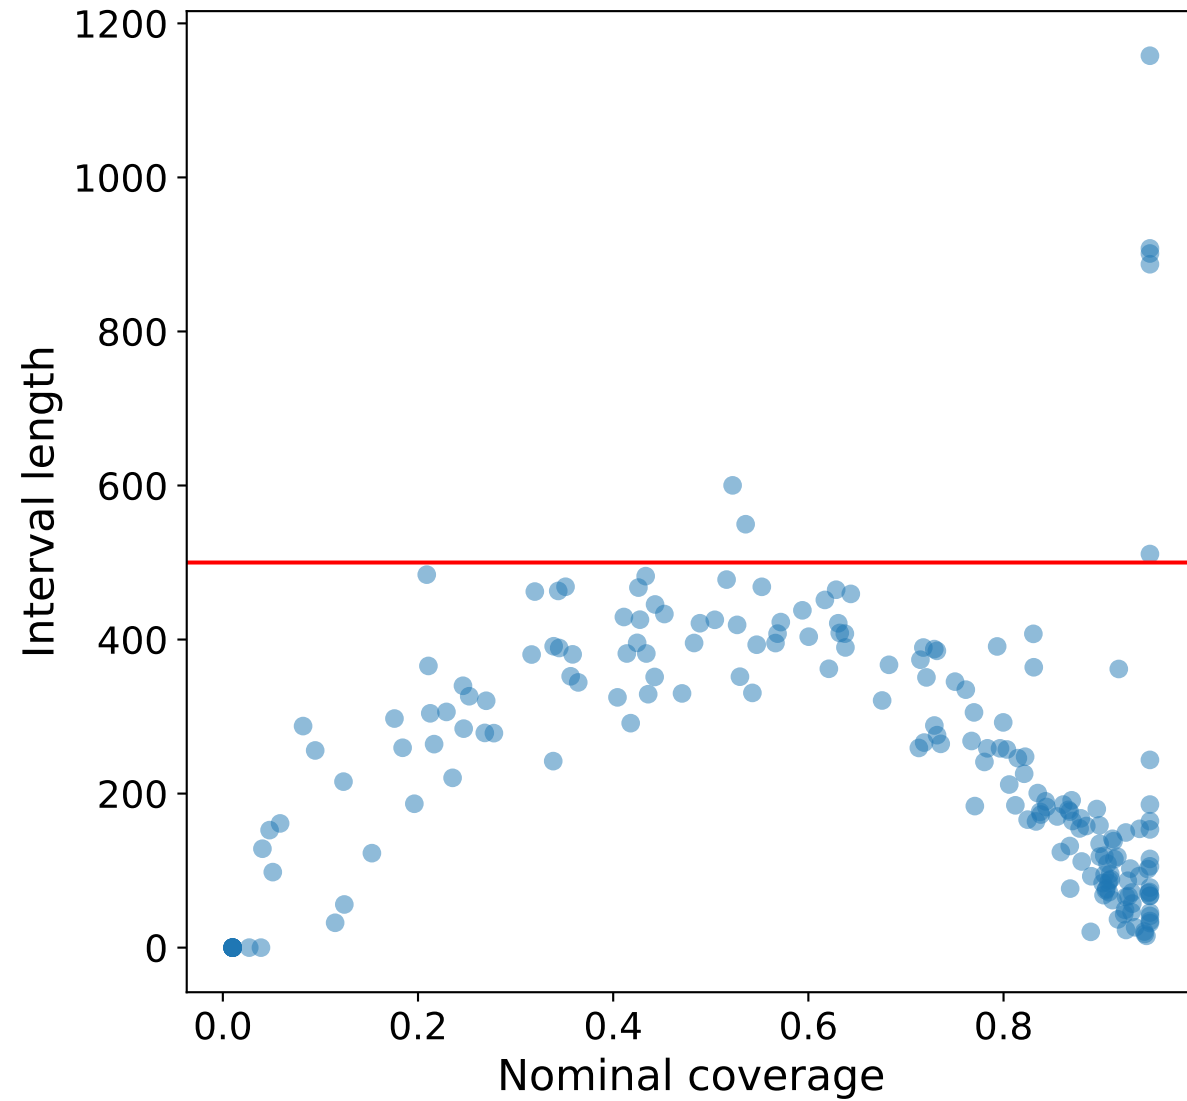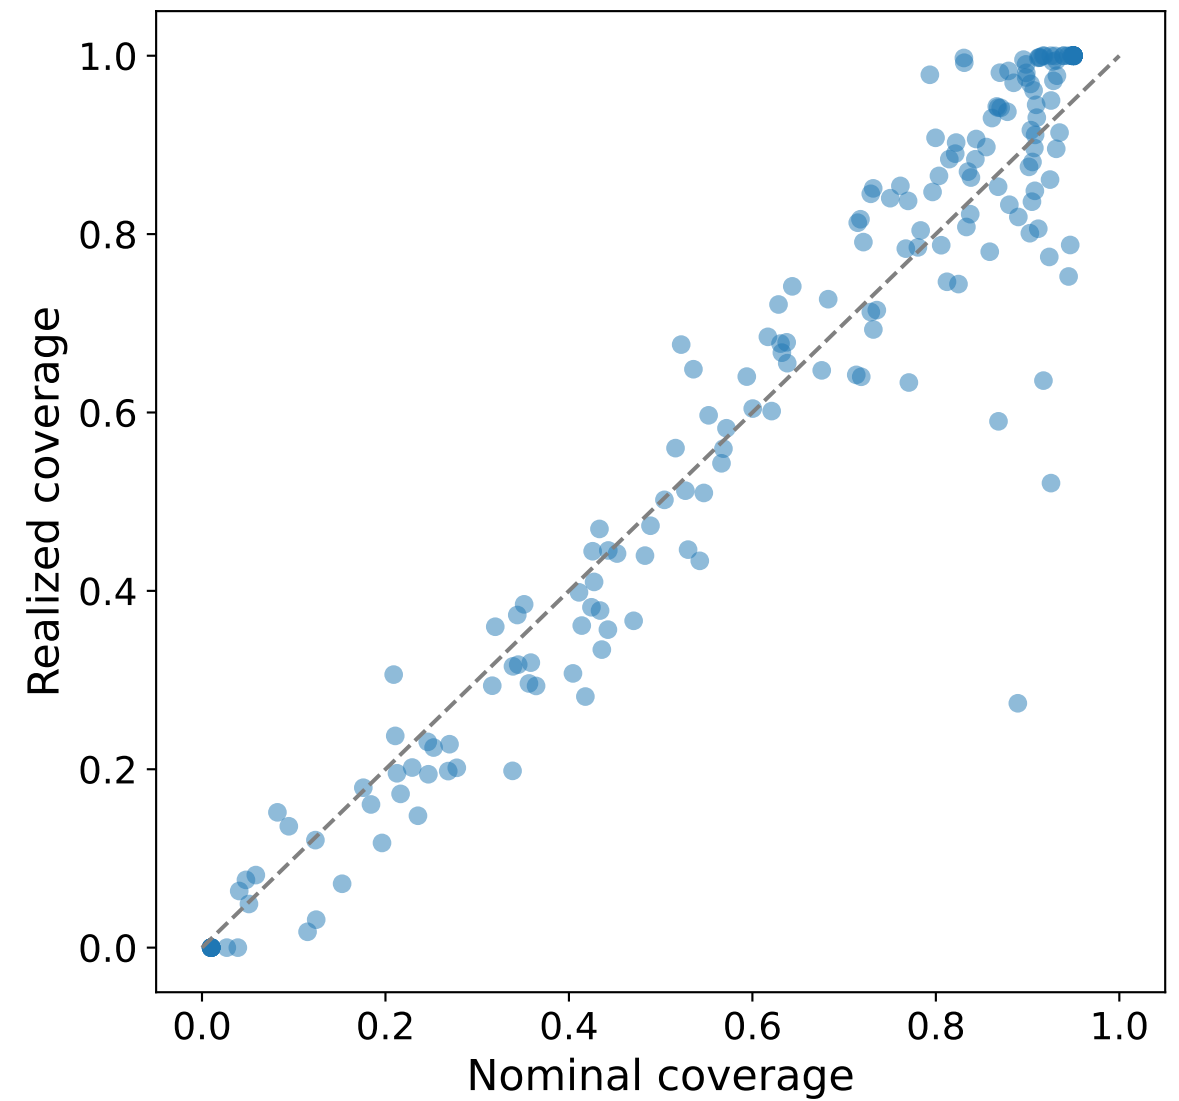

Supplement: supplementary_material [file attachment]

# Full conformal

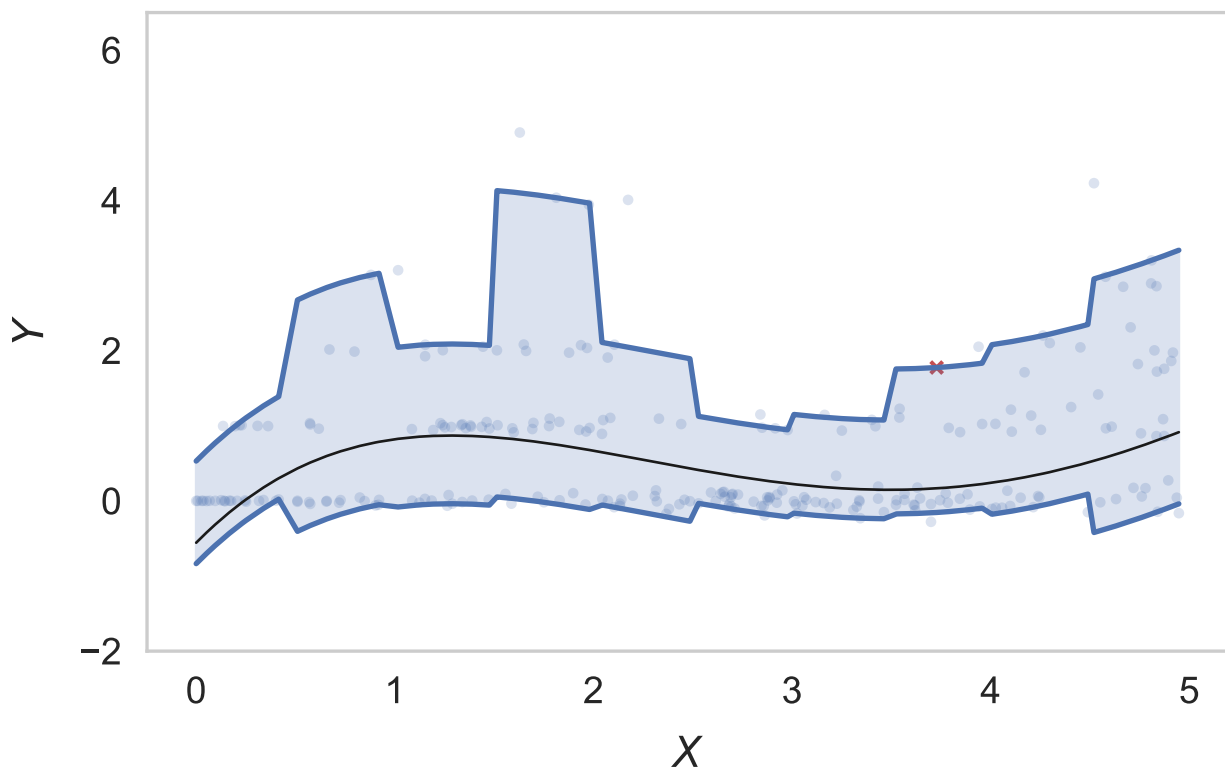

Supplement: supplementary_material [file attachment]

# Full conformal

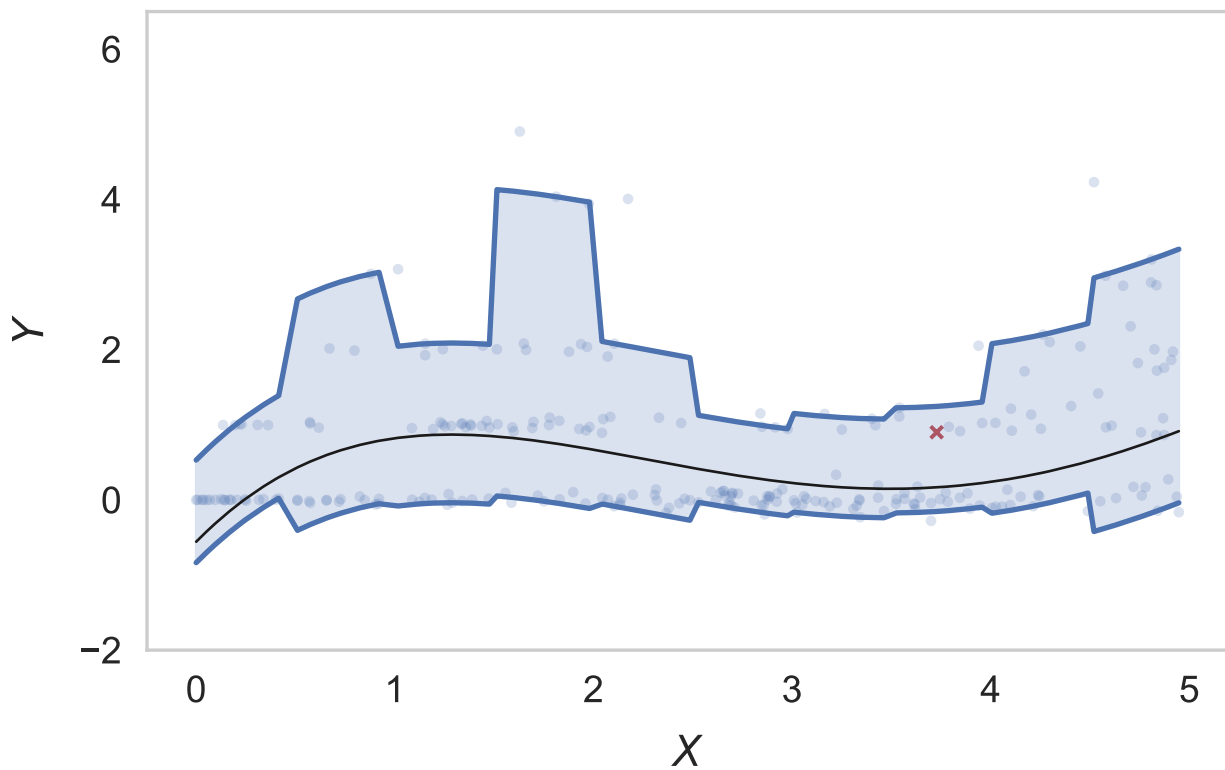

Supplement: supplementary_material [file attachment]

# Full conformal

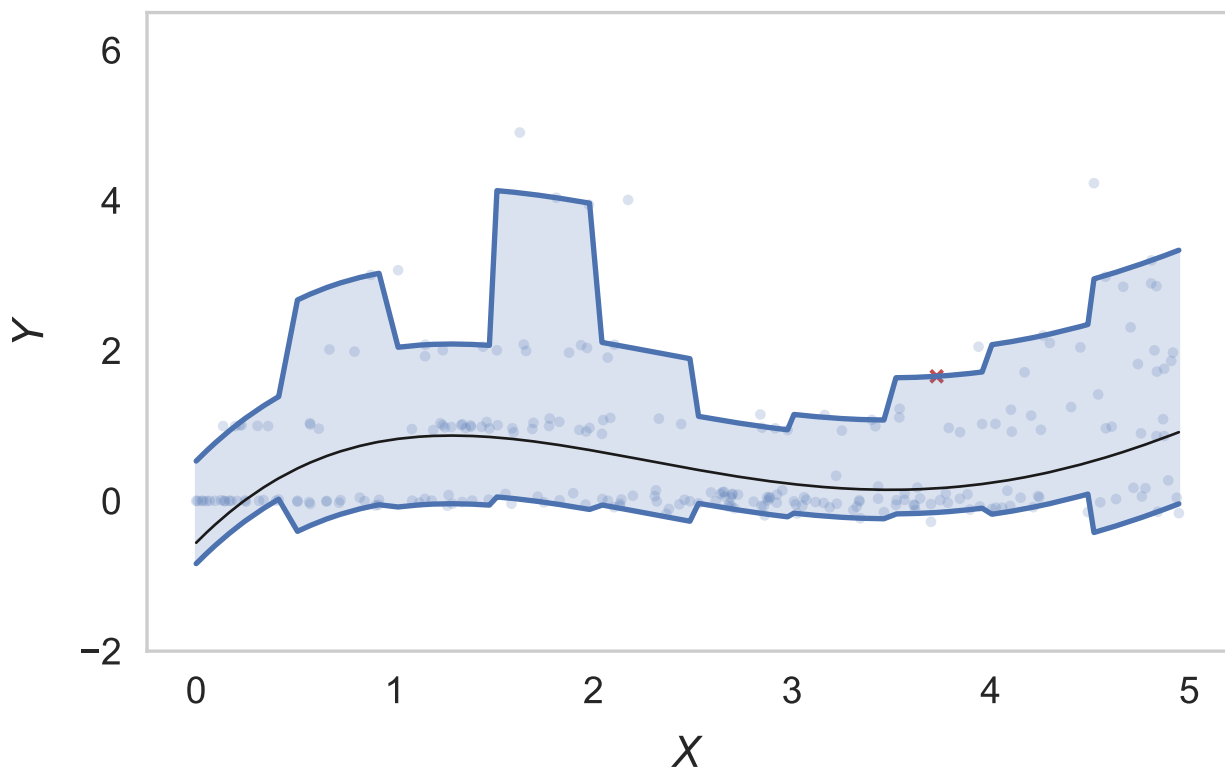

Supplement: supplementary_material [file attachment]

### Split Conformal

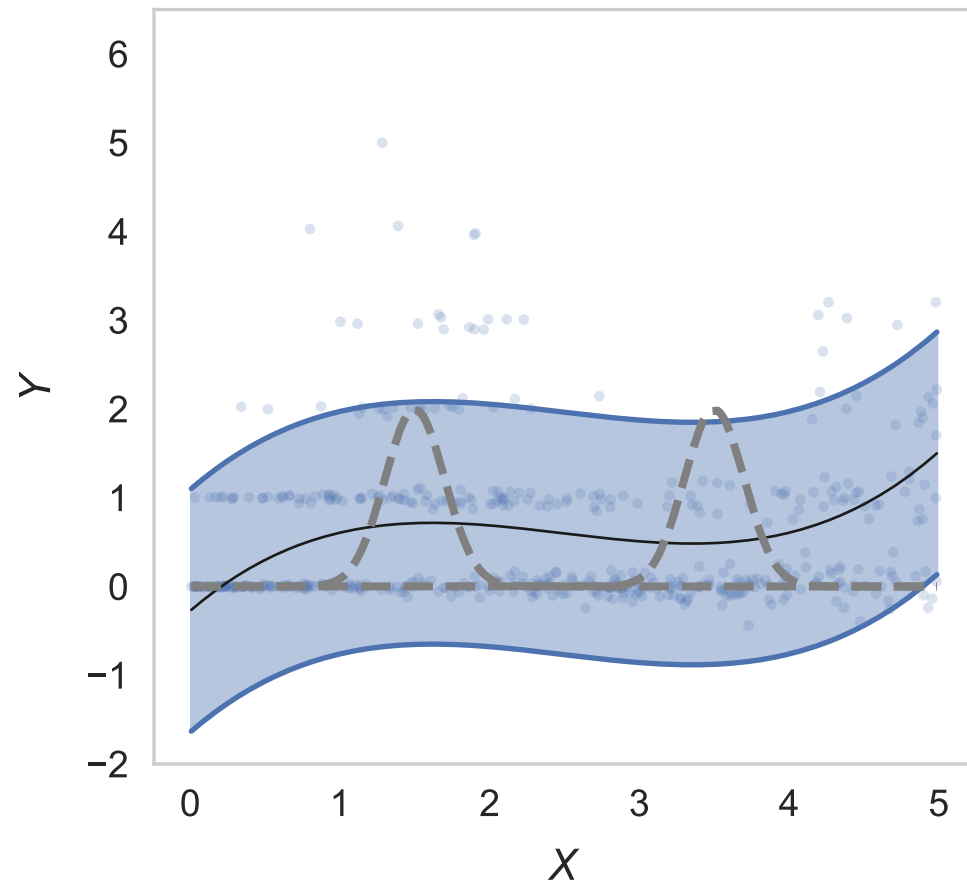

### Conditional Calibration

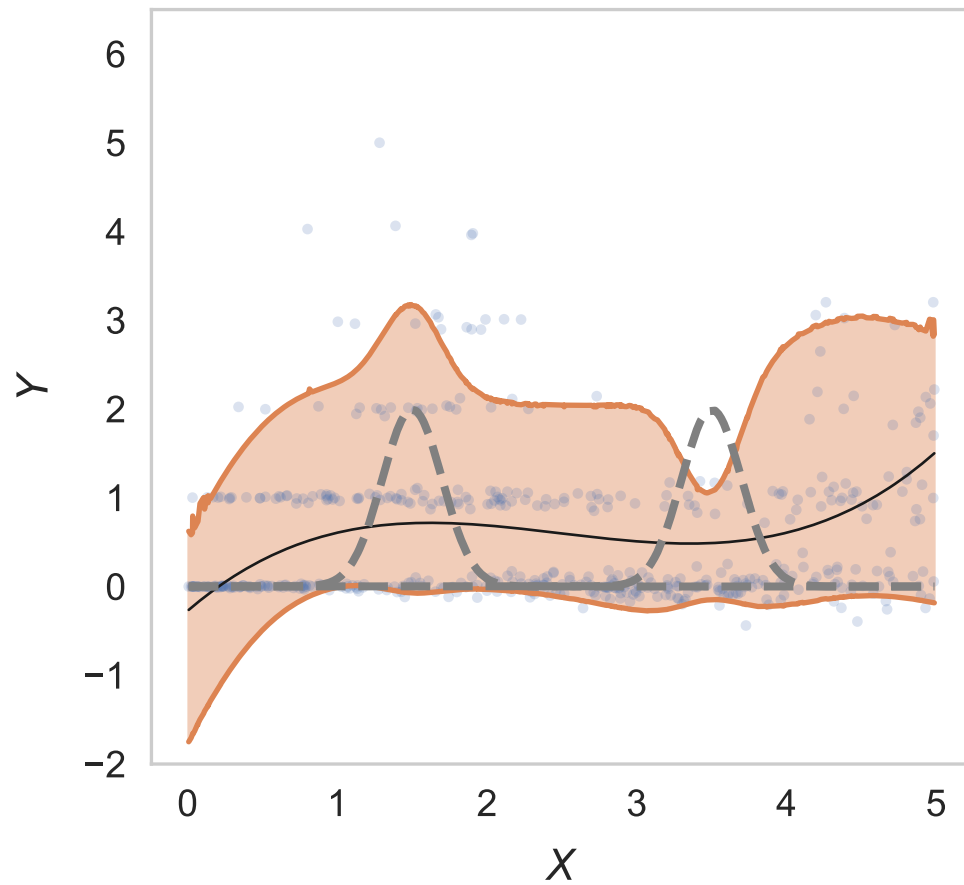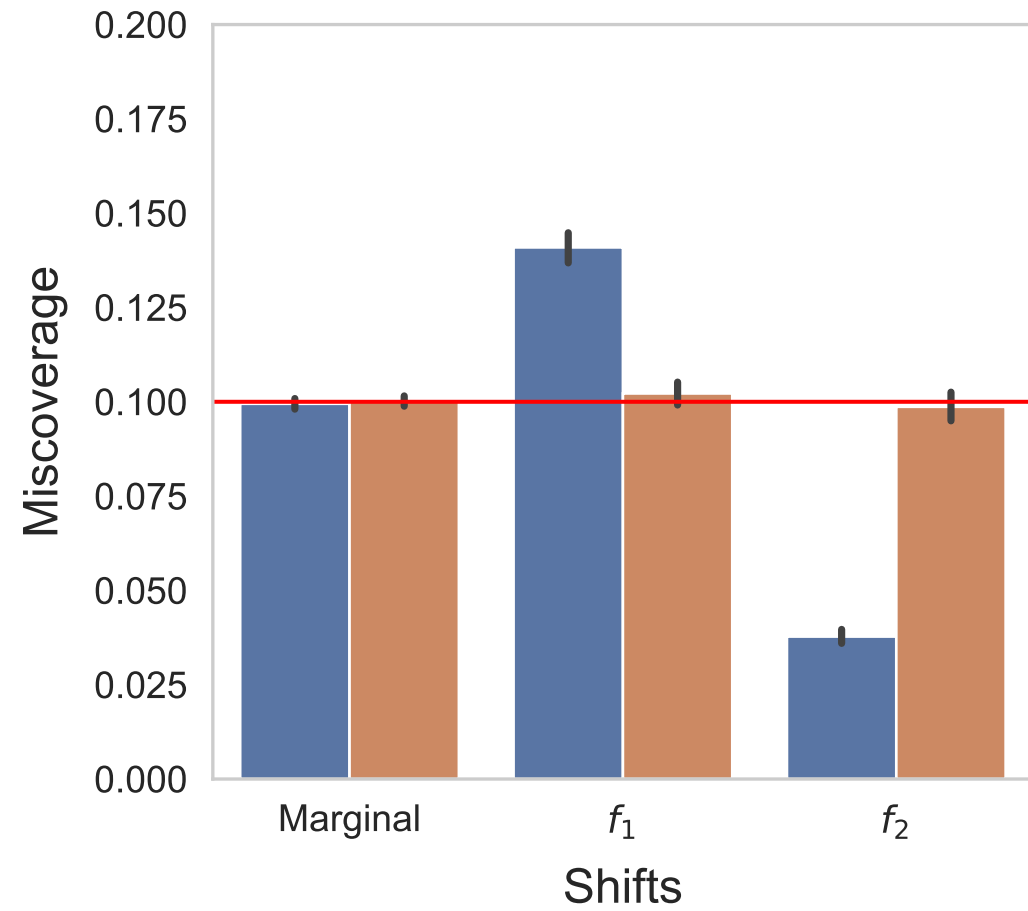

Supplement: supplementary_material [file attachment]

# Dual tracking

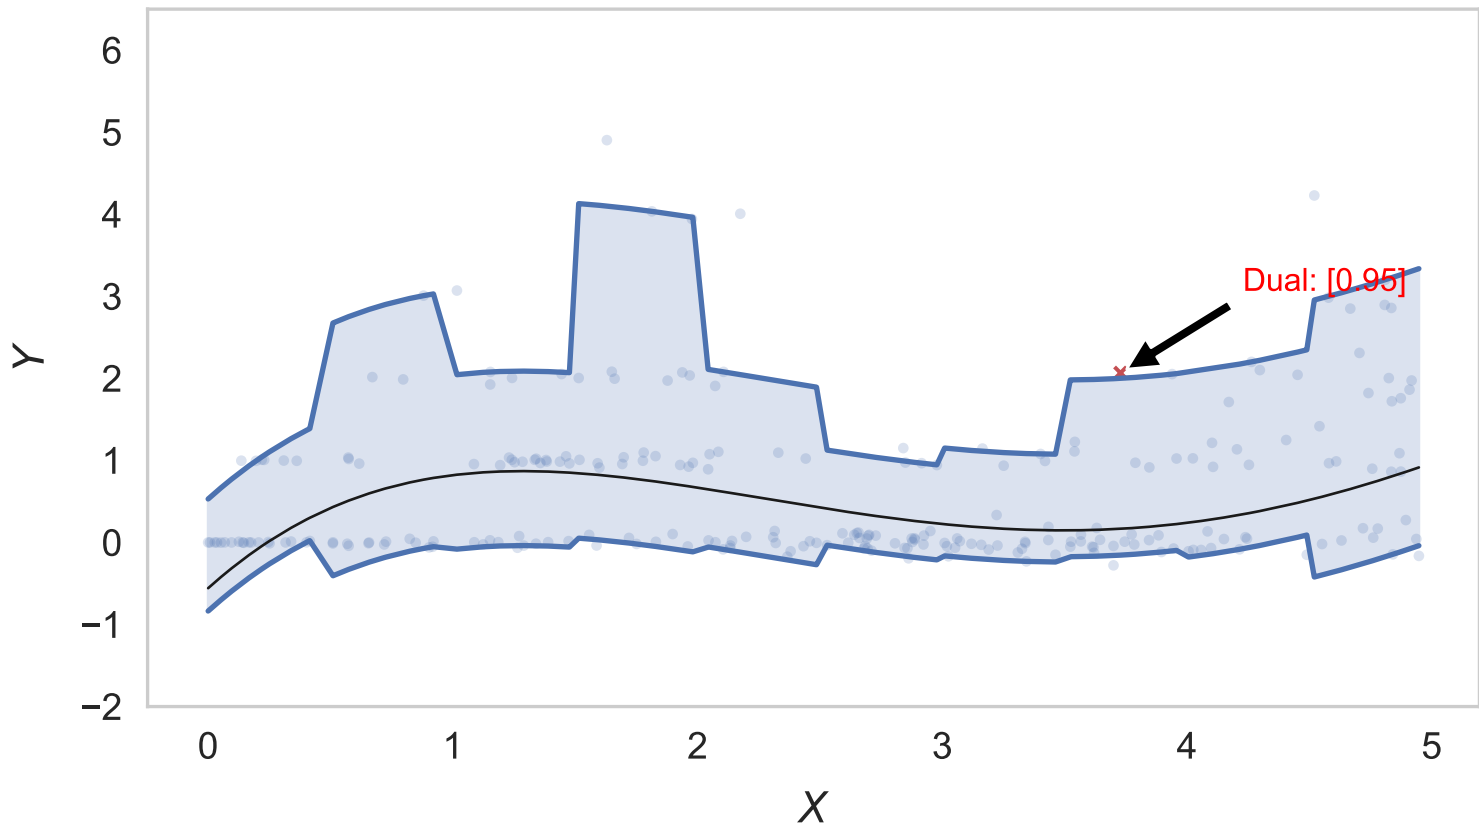

Supplement: supplementary_material [file attachment]

Conditional Calibration

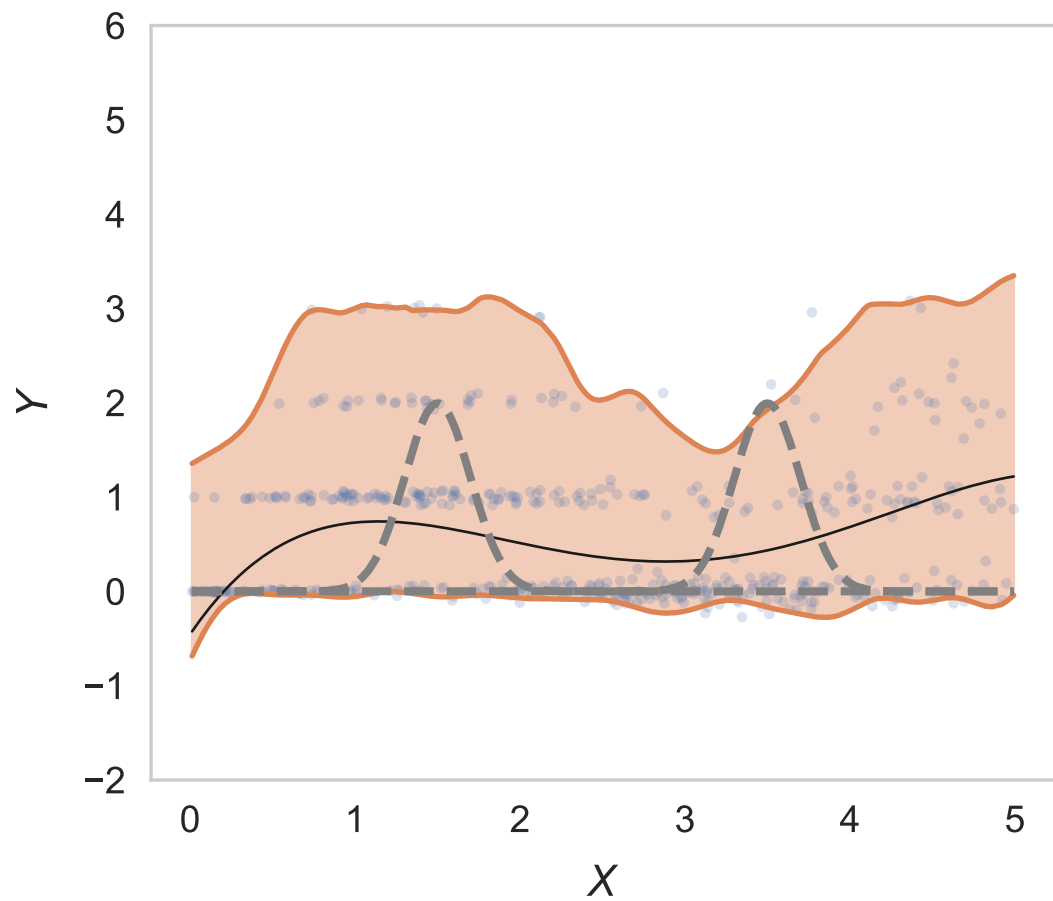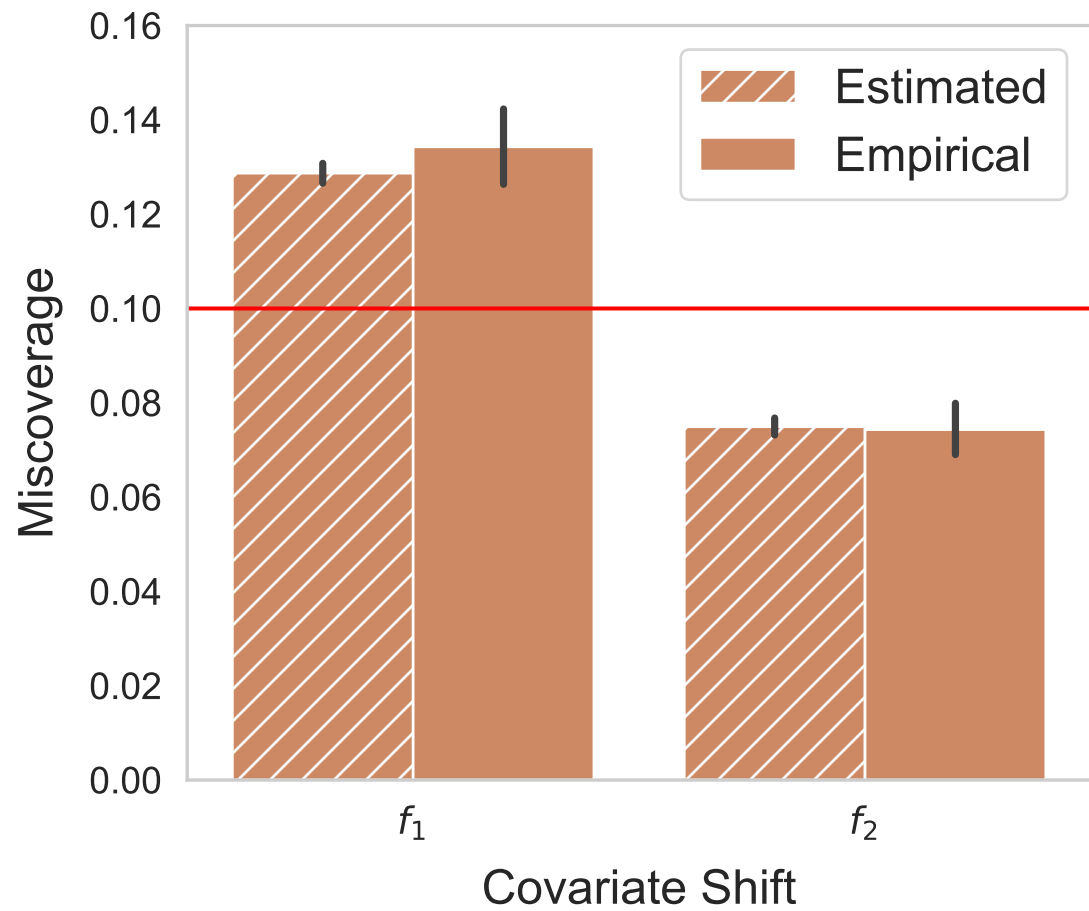

Supplement: supplementary_material [file attachment]

# Full conformal

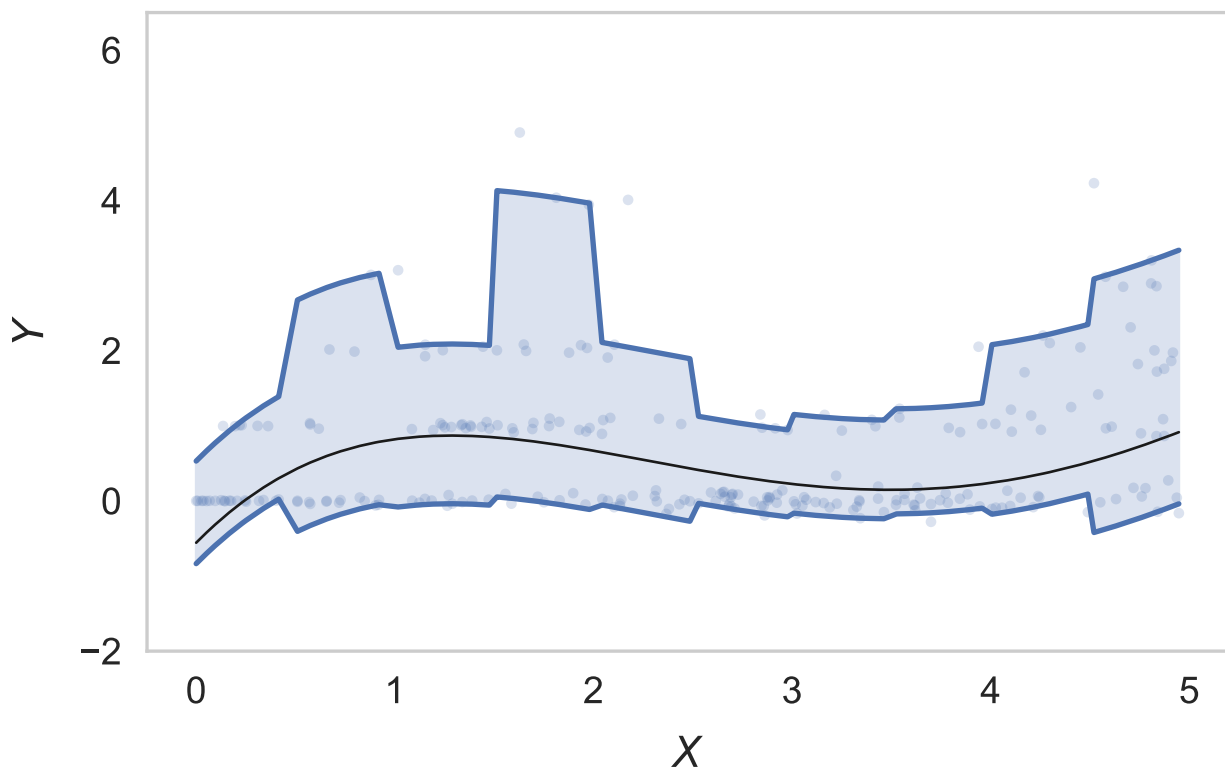

Supplement: supplementary_material [file attachment]

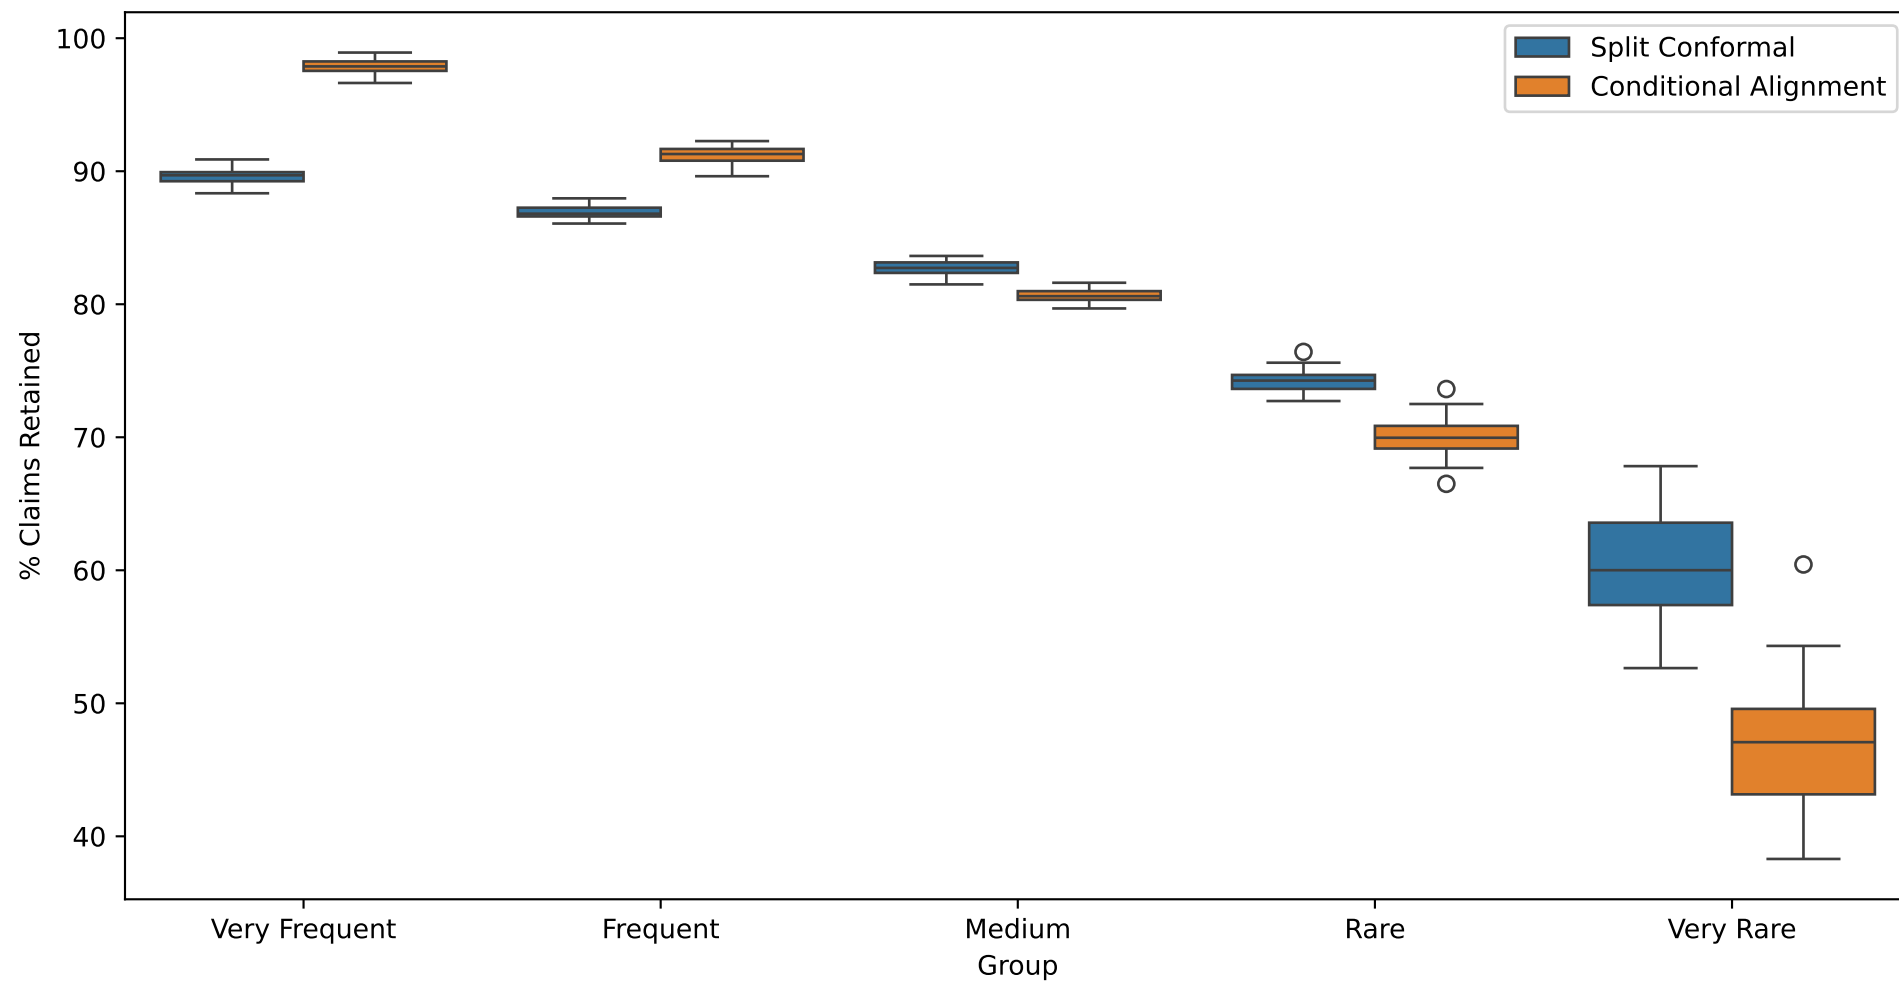

Supplement: supplementary_material [file attachment]

# Dual tracking

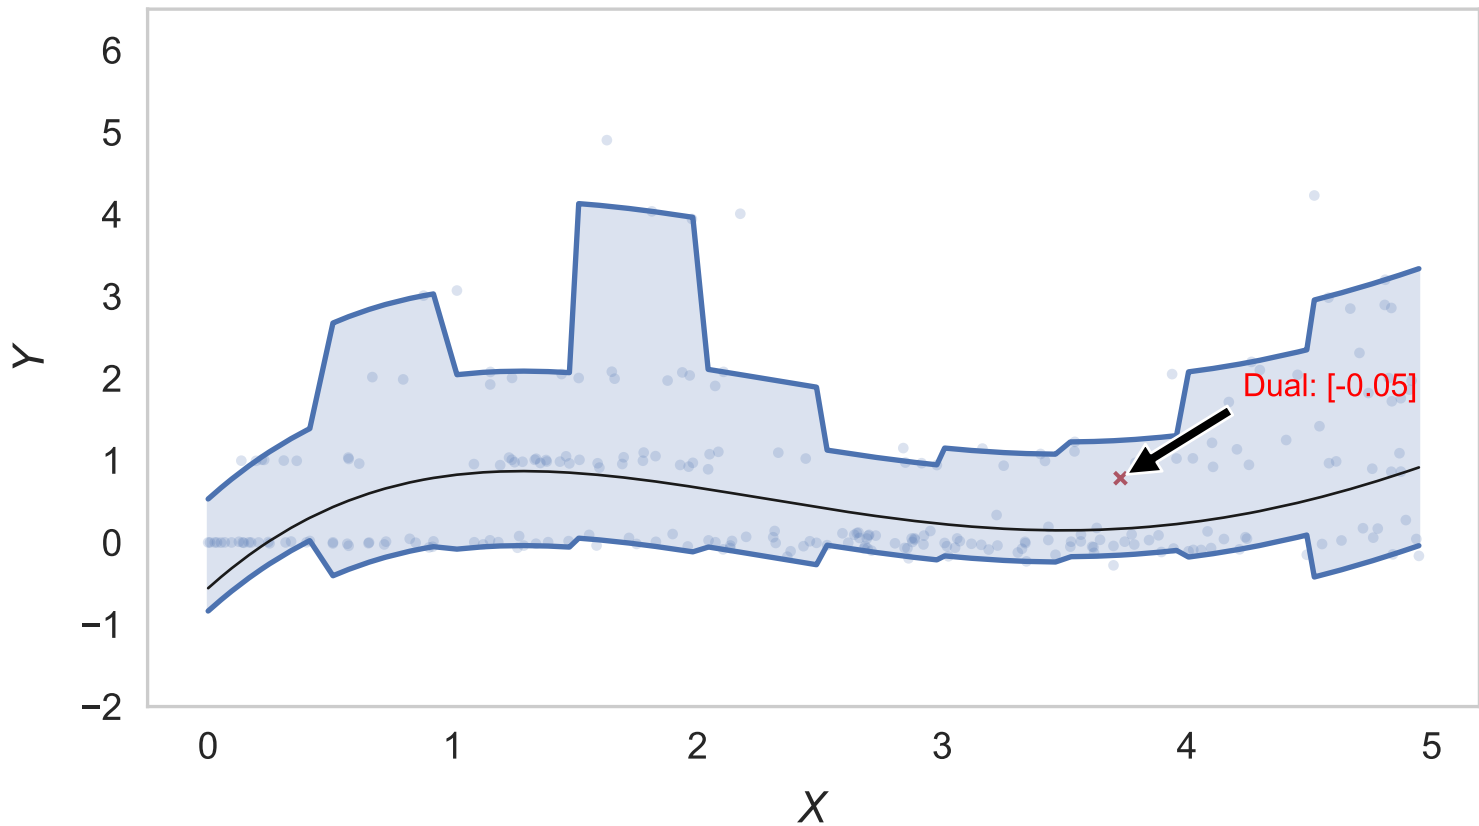

Supplement: supplementary_material [file attachment]

# Full conformal

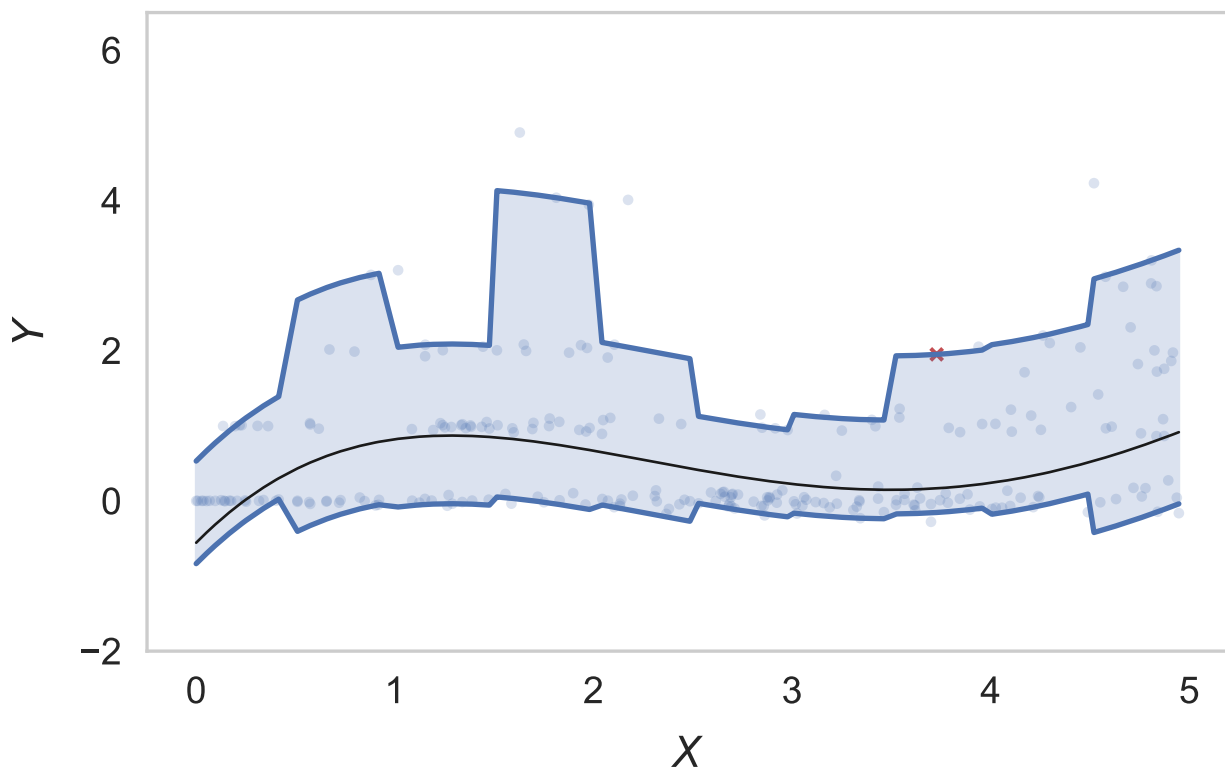

Supplement: supplementary_material [file attachment]

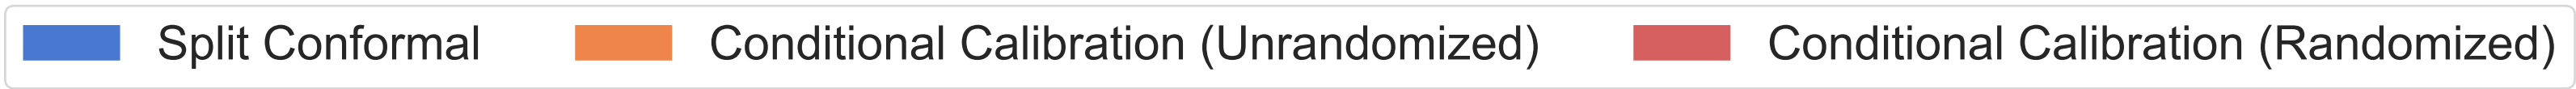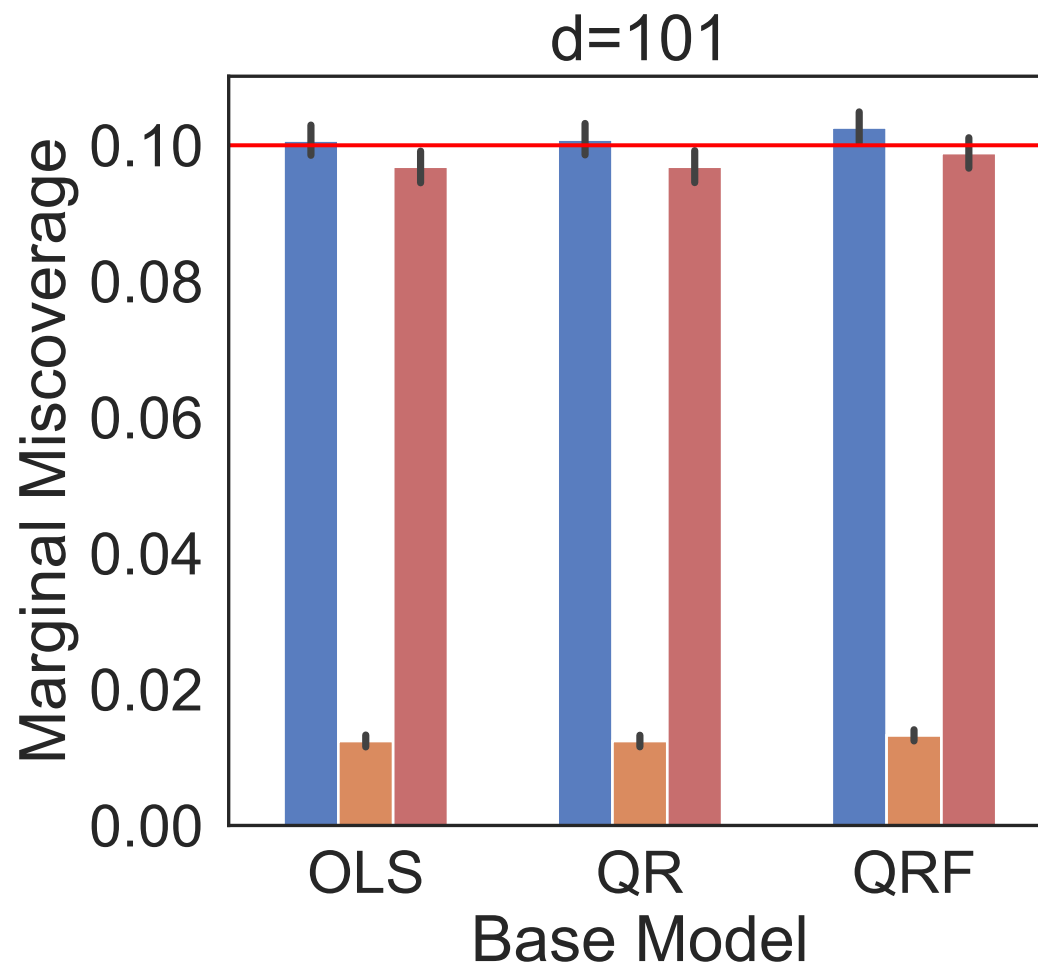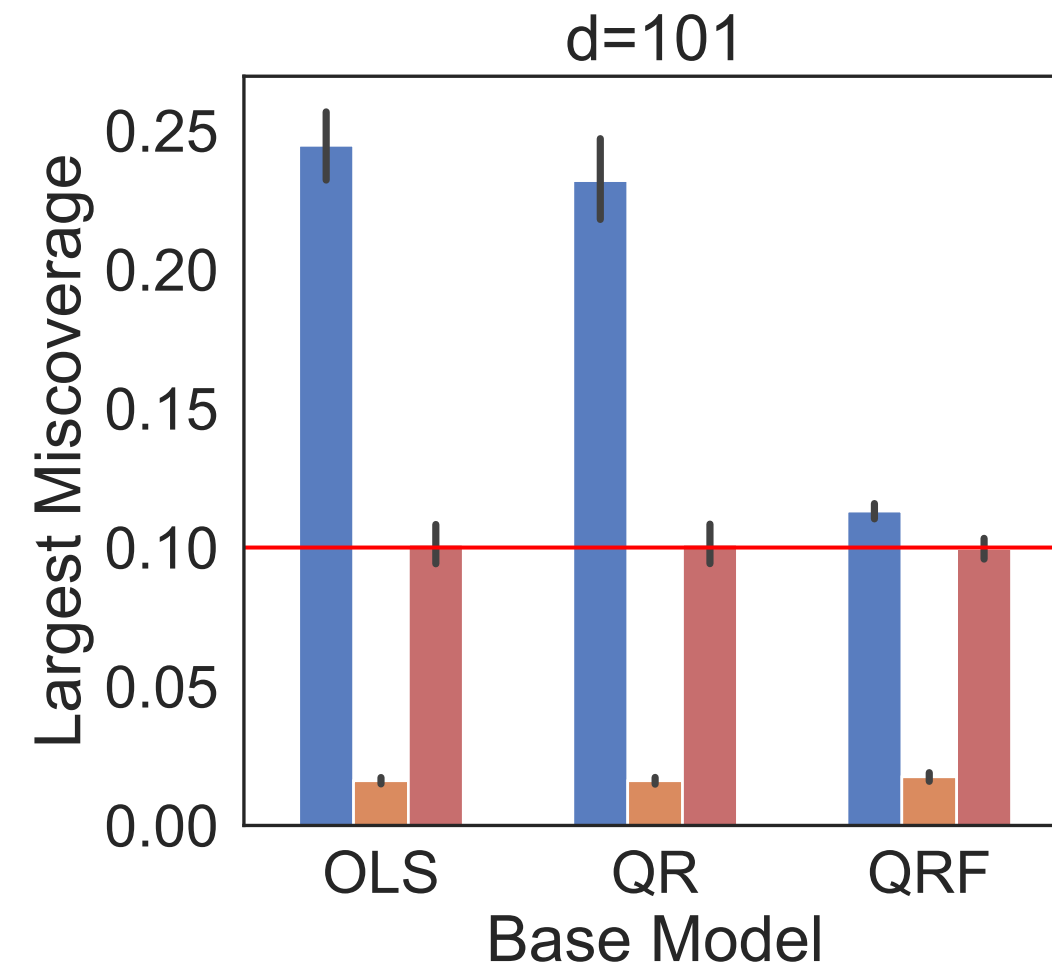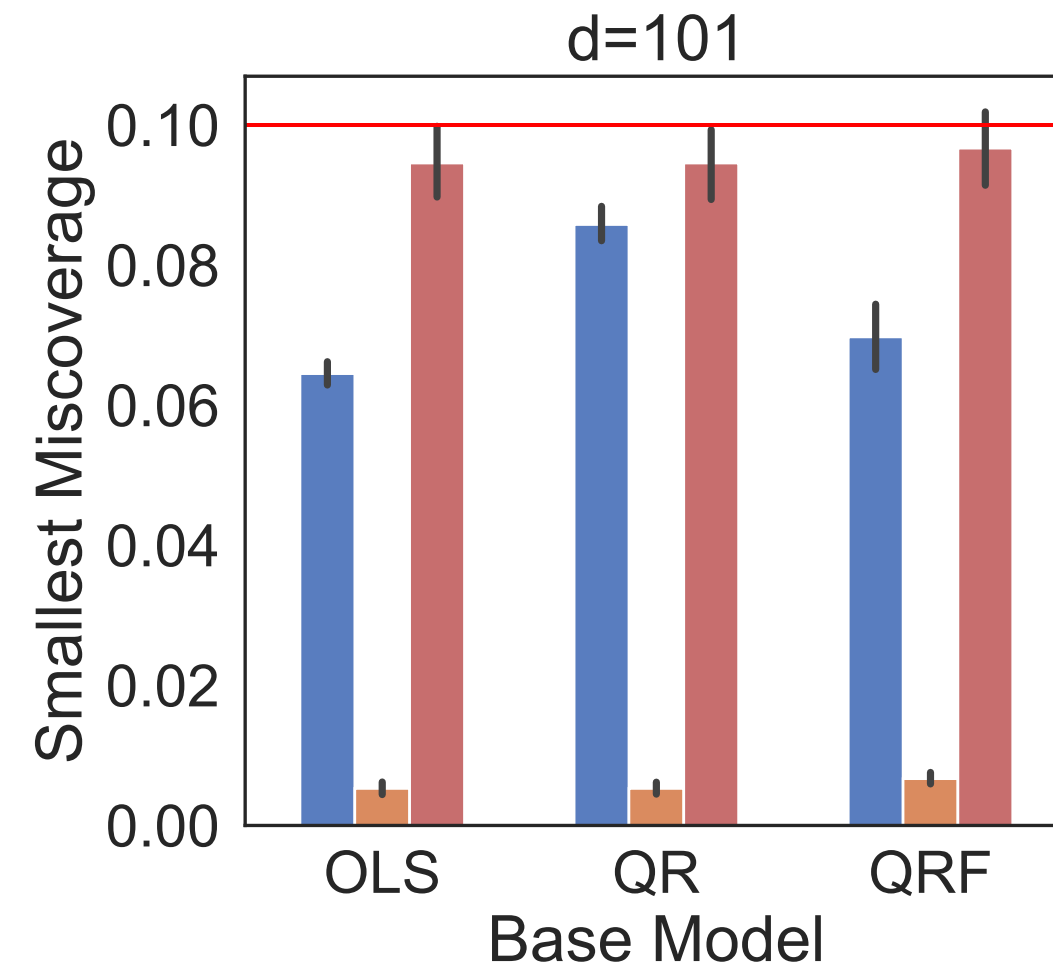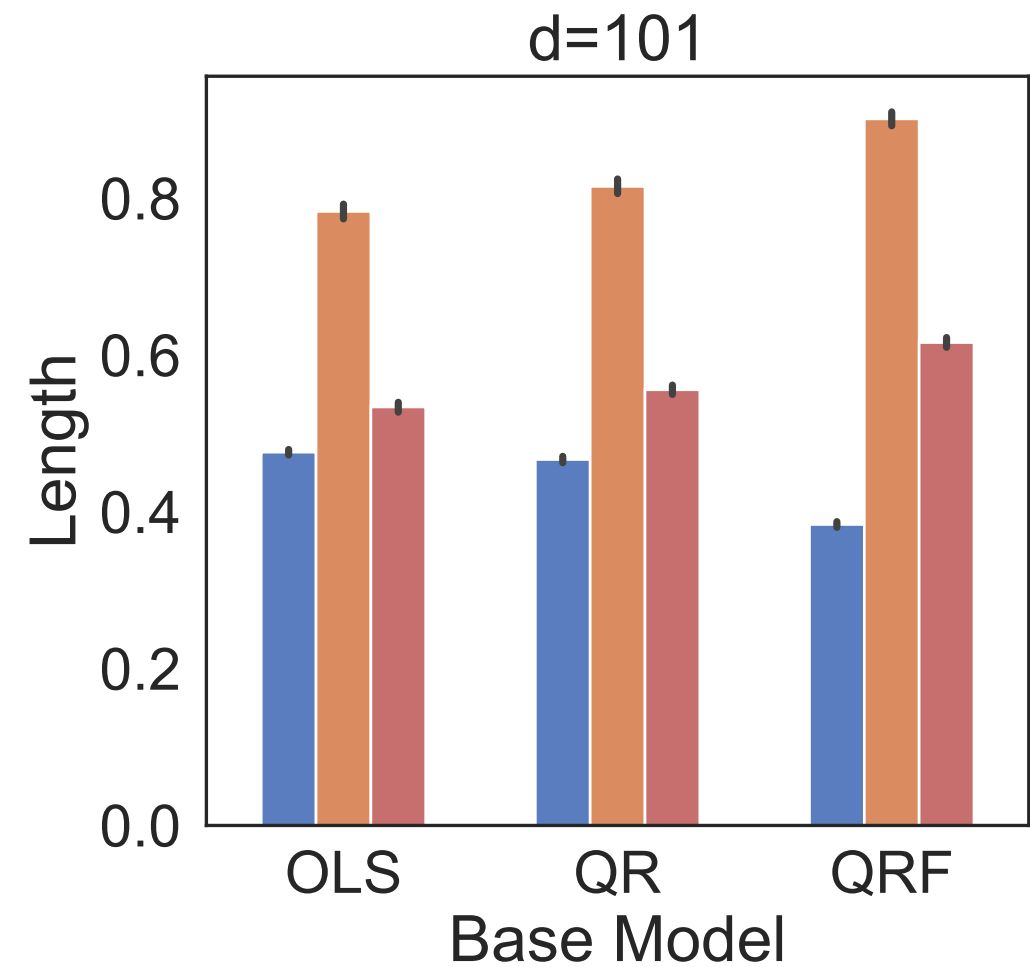

Supplement: supplementary_material [file attachment]

### Split Conformal

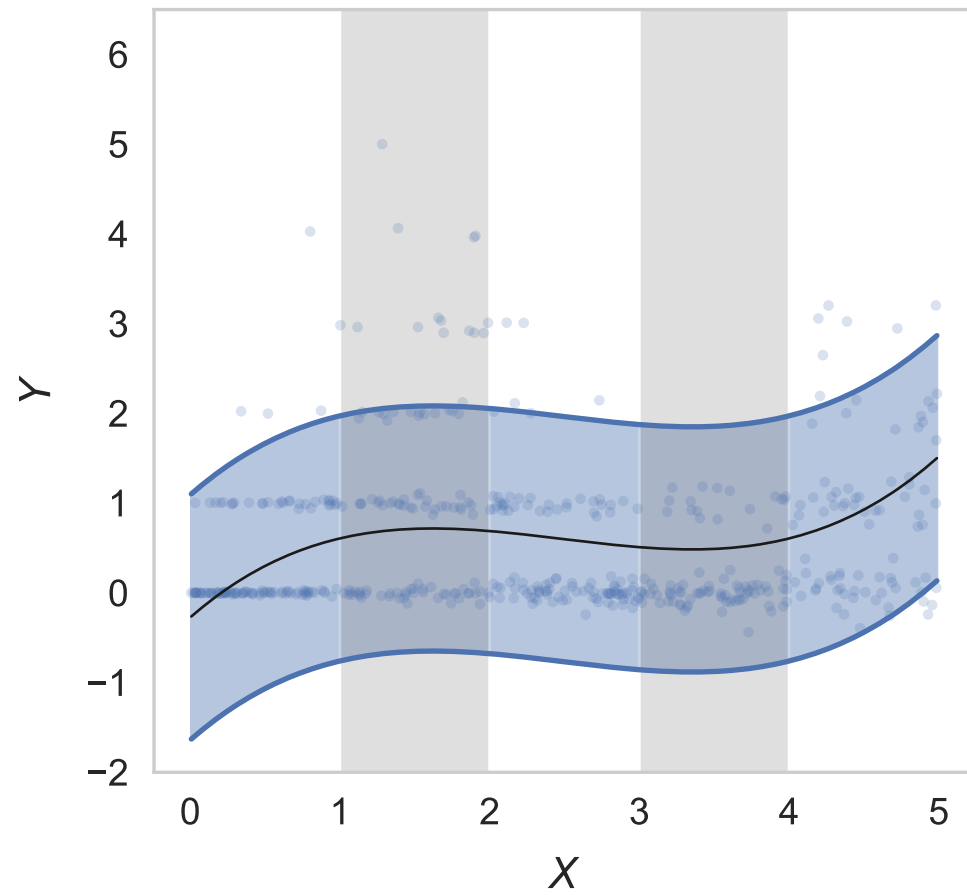

### Conditional Calibration

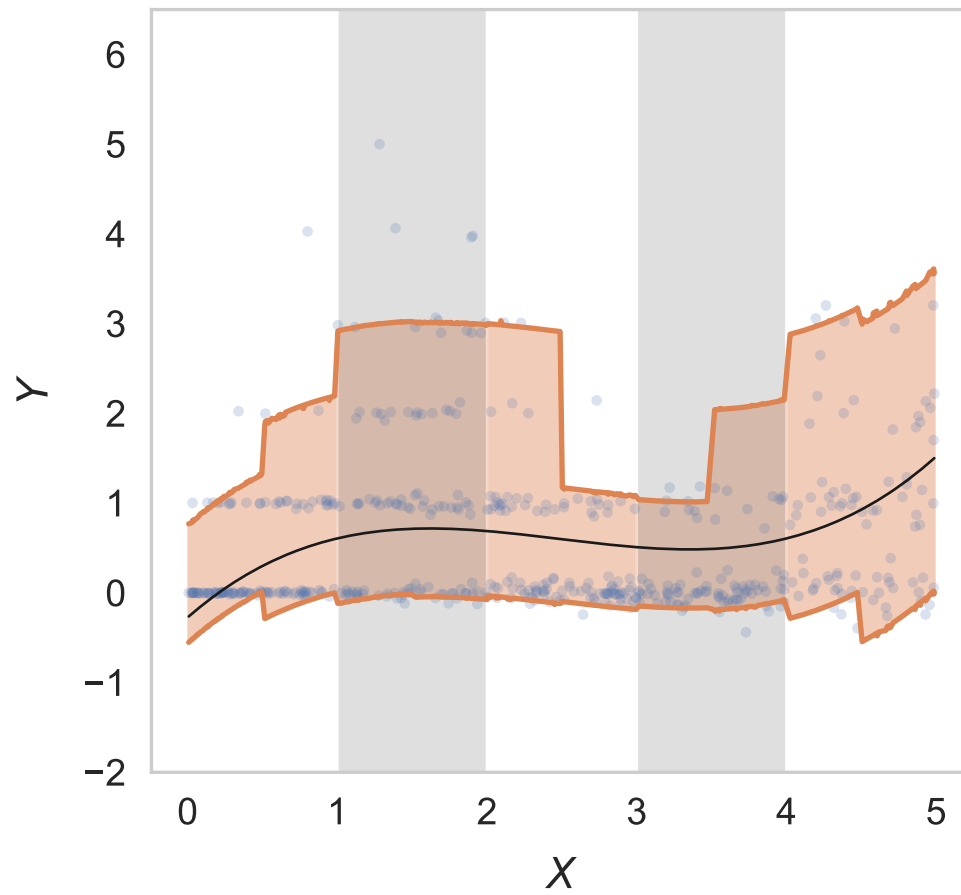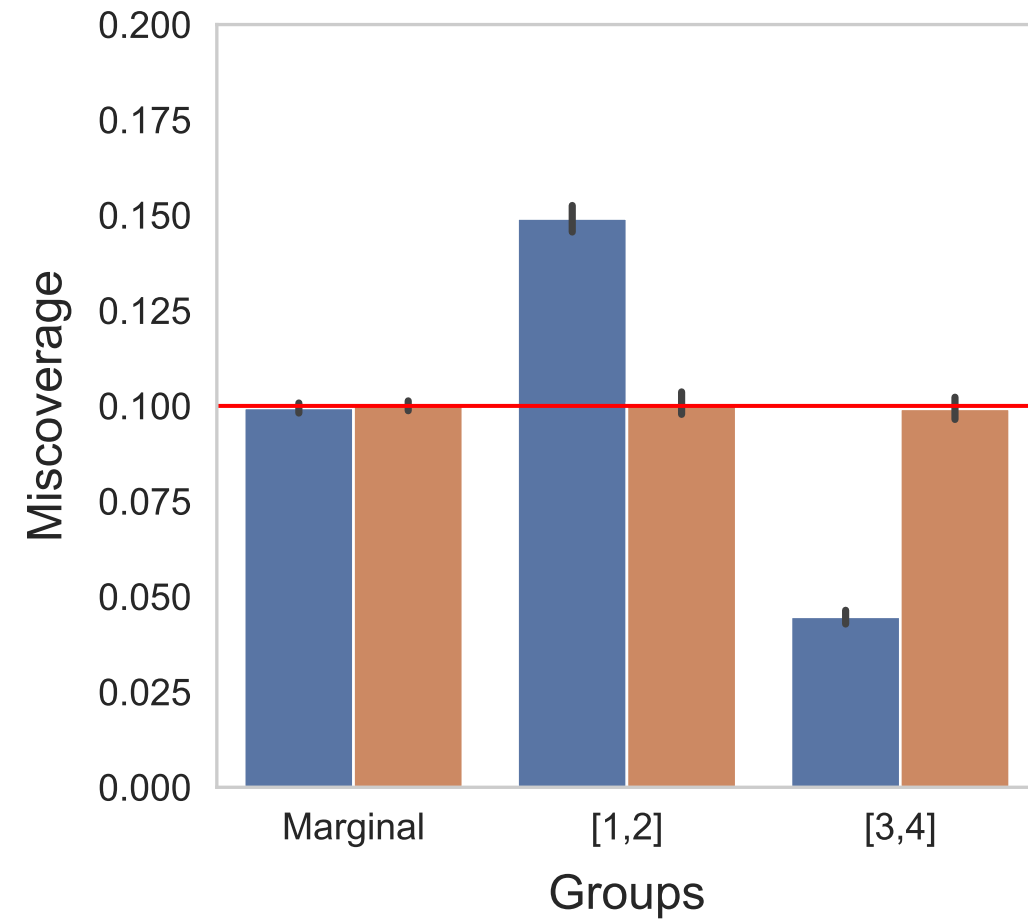

Supplement: supplementary_material [file attachment]

# Full conformal

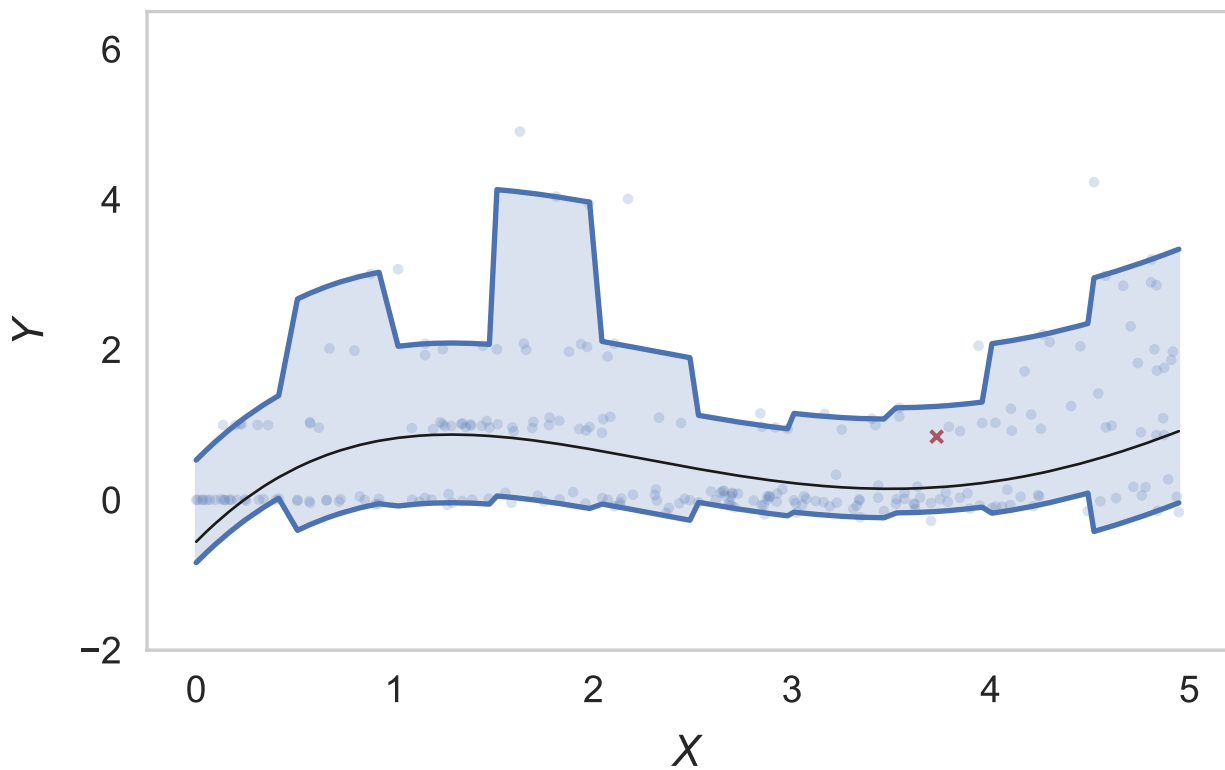

Supplement: supplementary_material [file attachment]

# Dual tracking

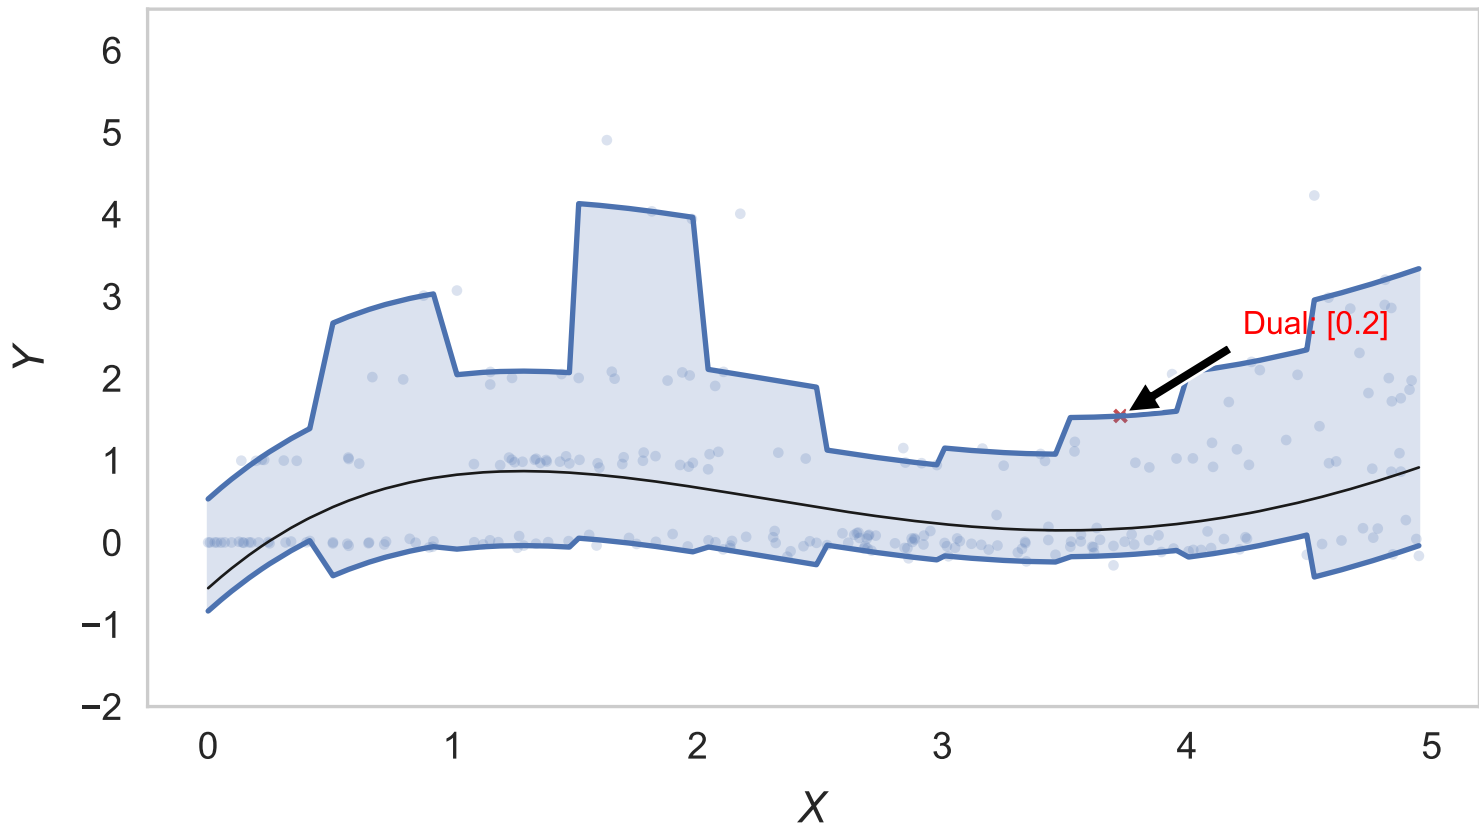

Supplement: supplementary_material [file attachment]

# Dual tracking

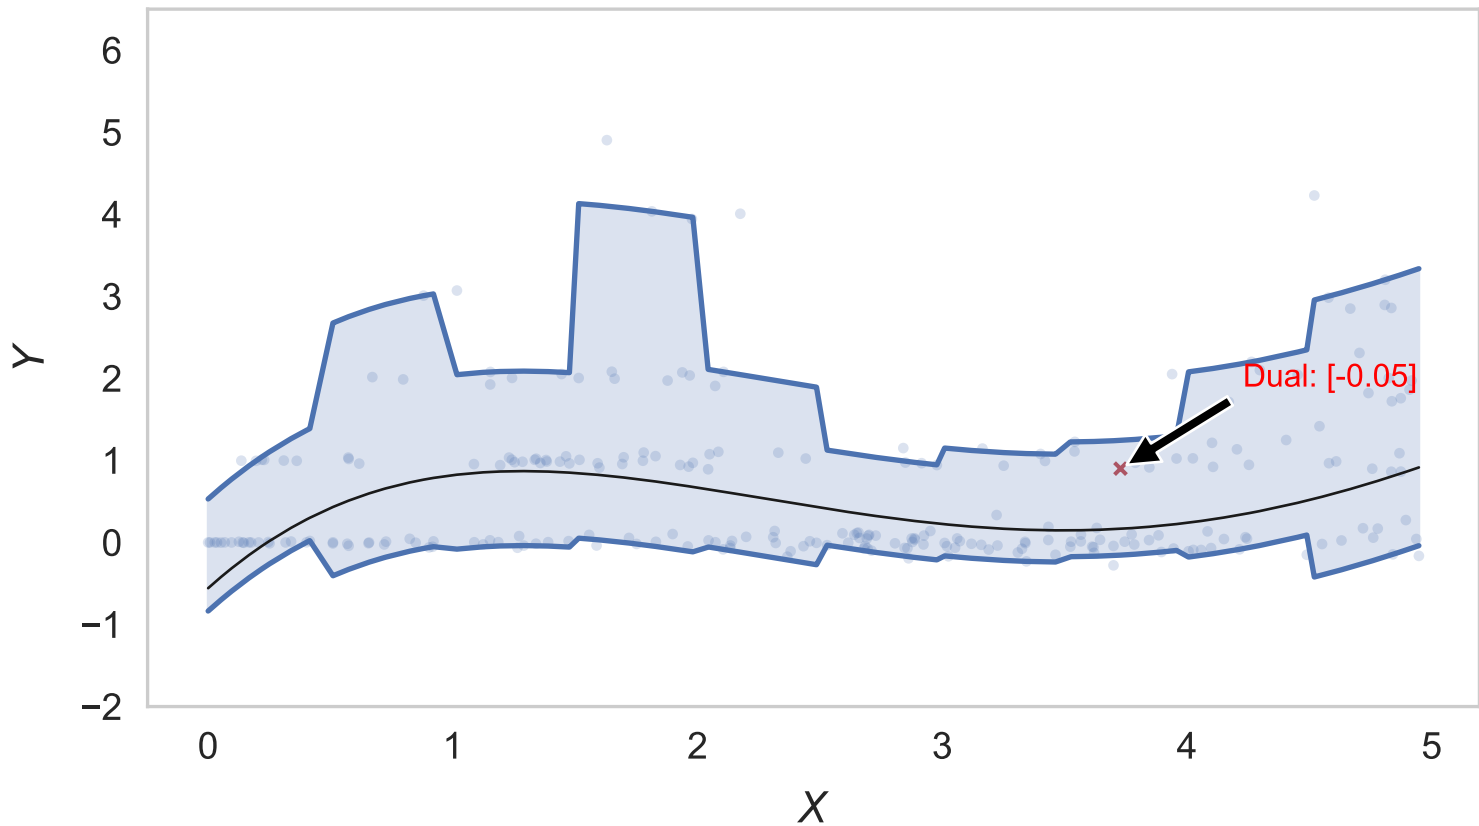

Supplement: supplementary_material [file attachment]

# Full conformal

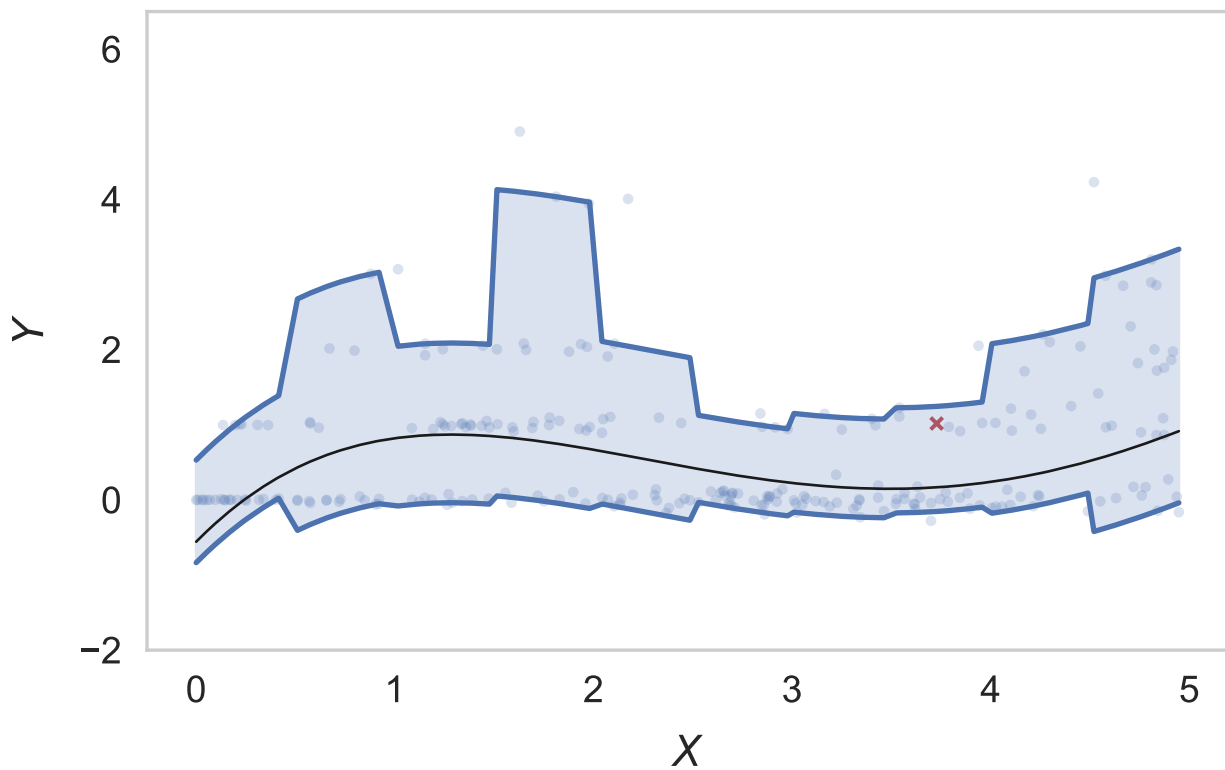

Supplement: supplementary_material [file attachment]

# Dual tracking

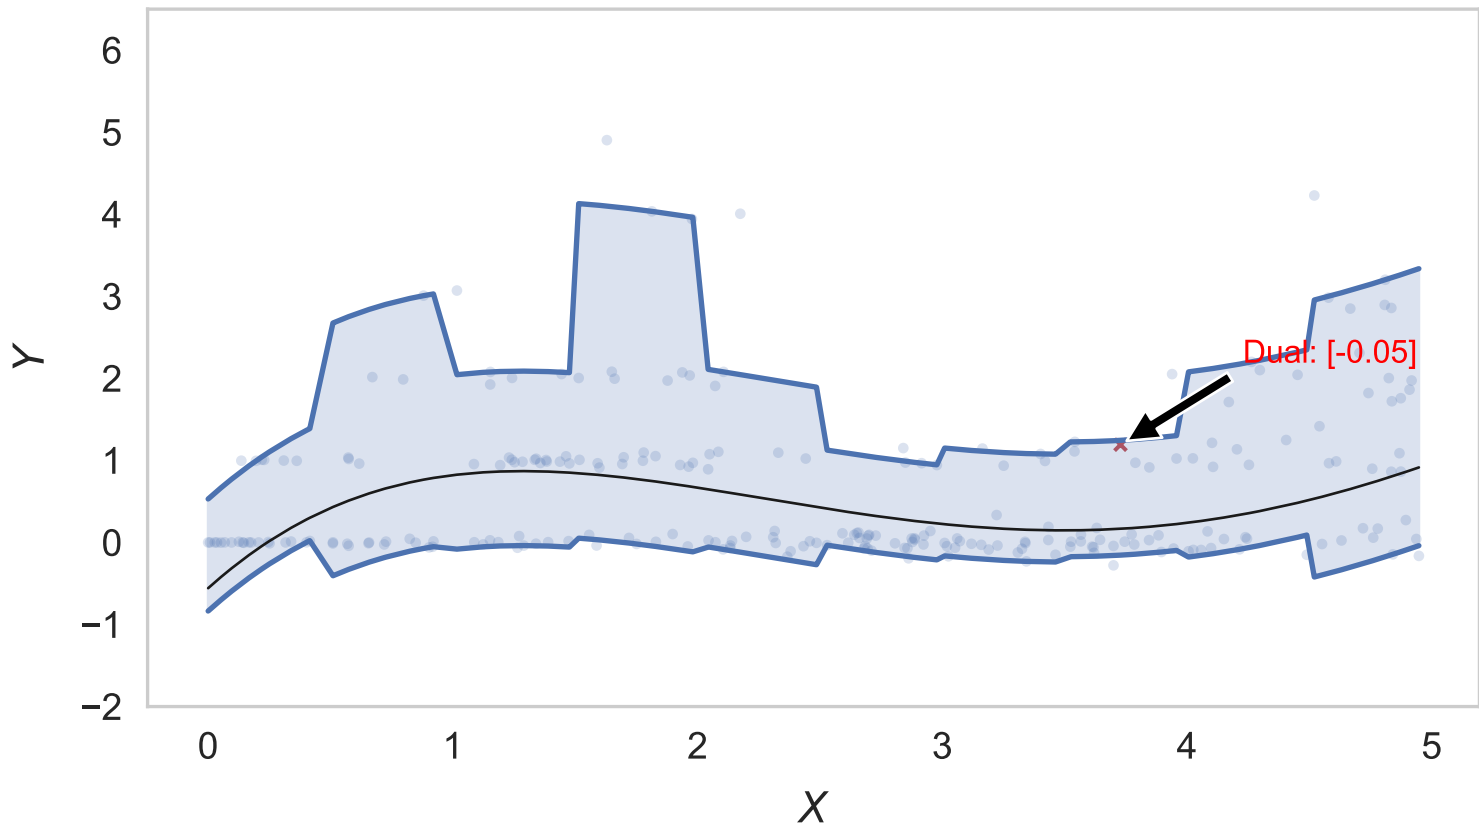

Supplement: supplementary_material [file attachment]

# Full conformal

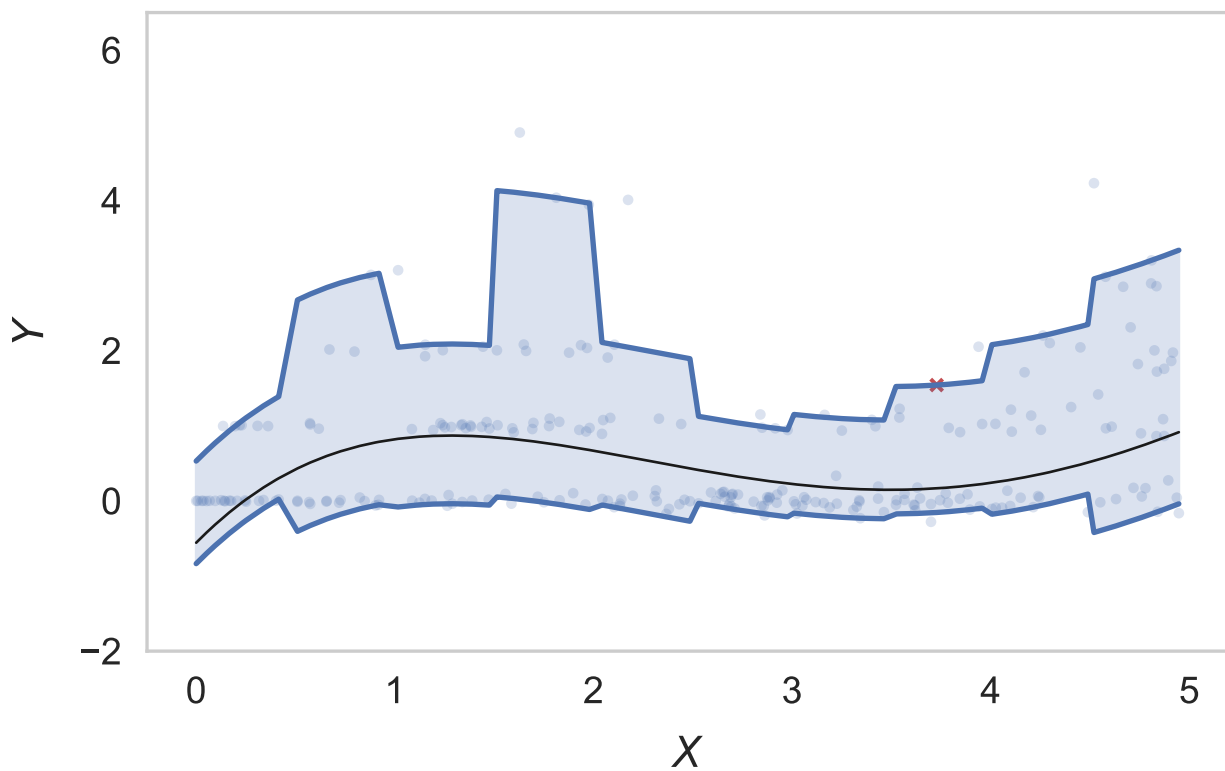

Supplement: supplementary_material [file attachment]

### Conditional Calibration

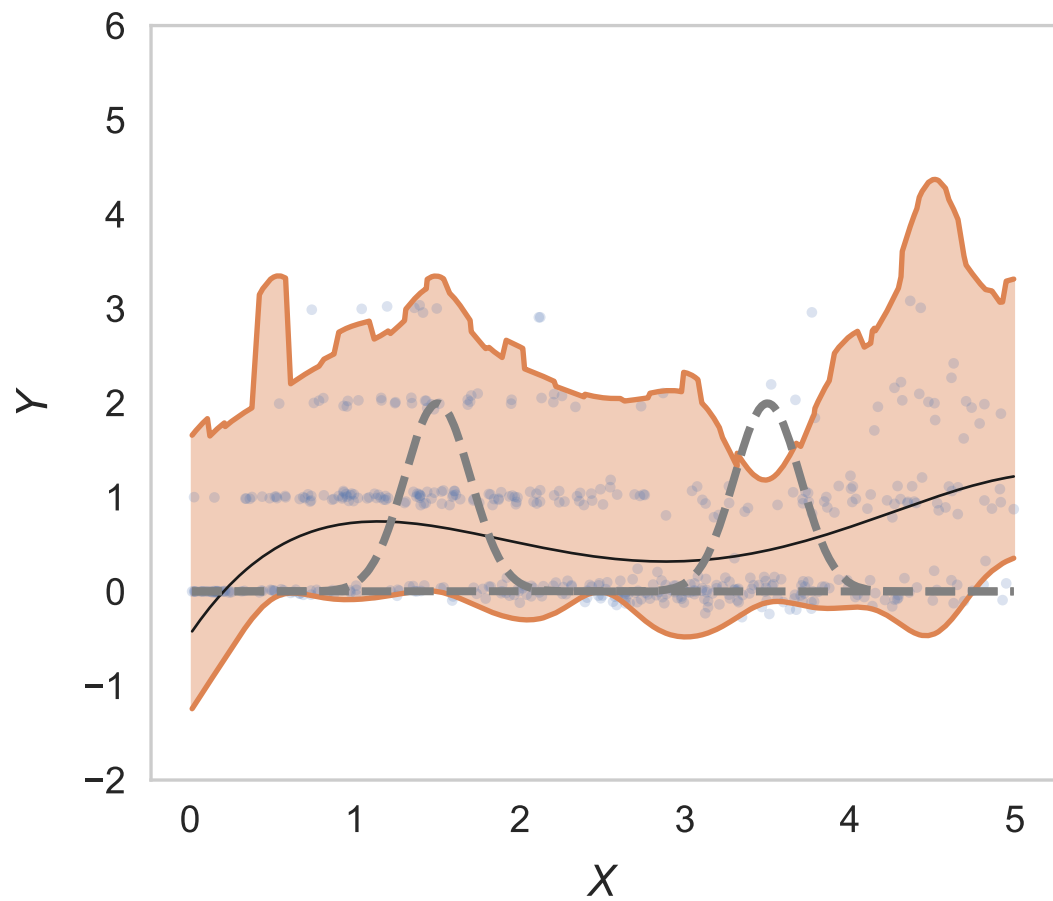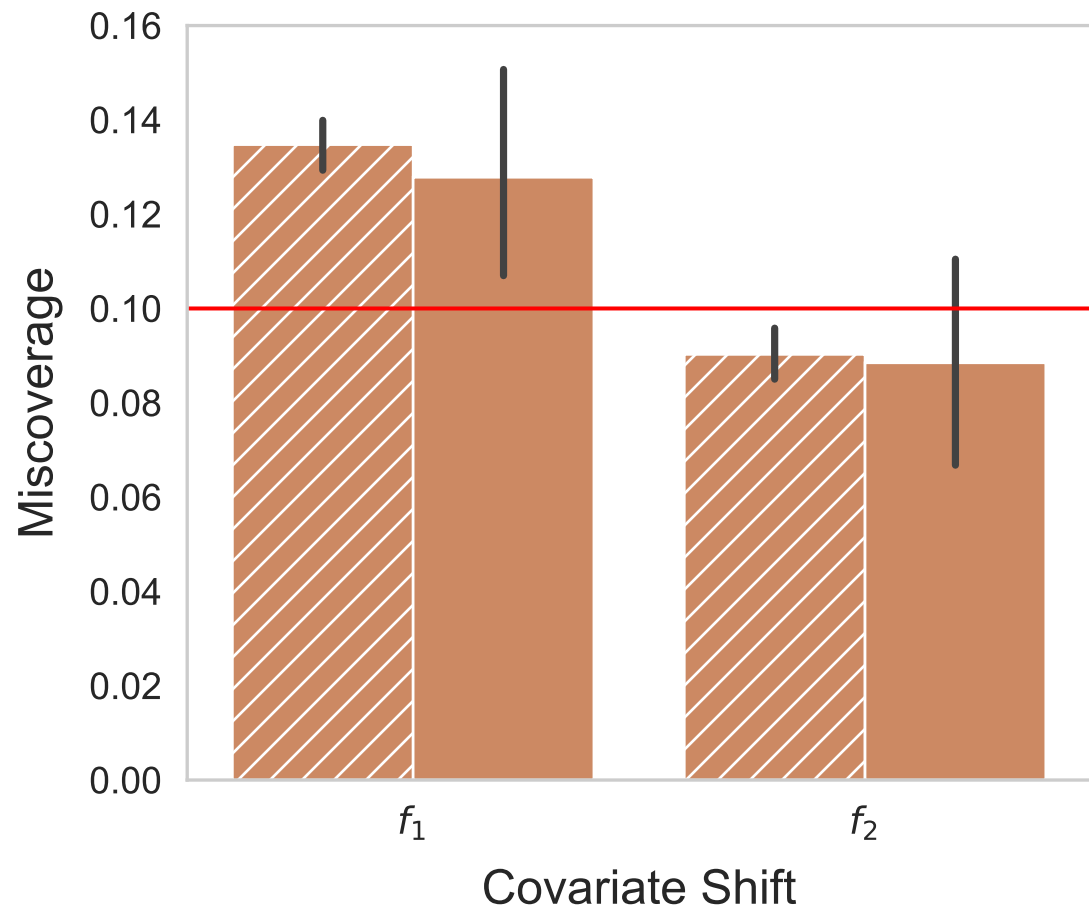

Supplement: supplementary_material [file attachment]

### Split Conformal

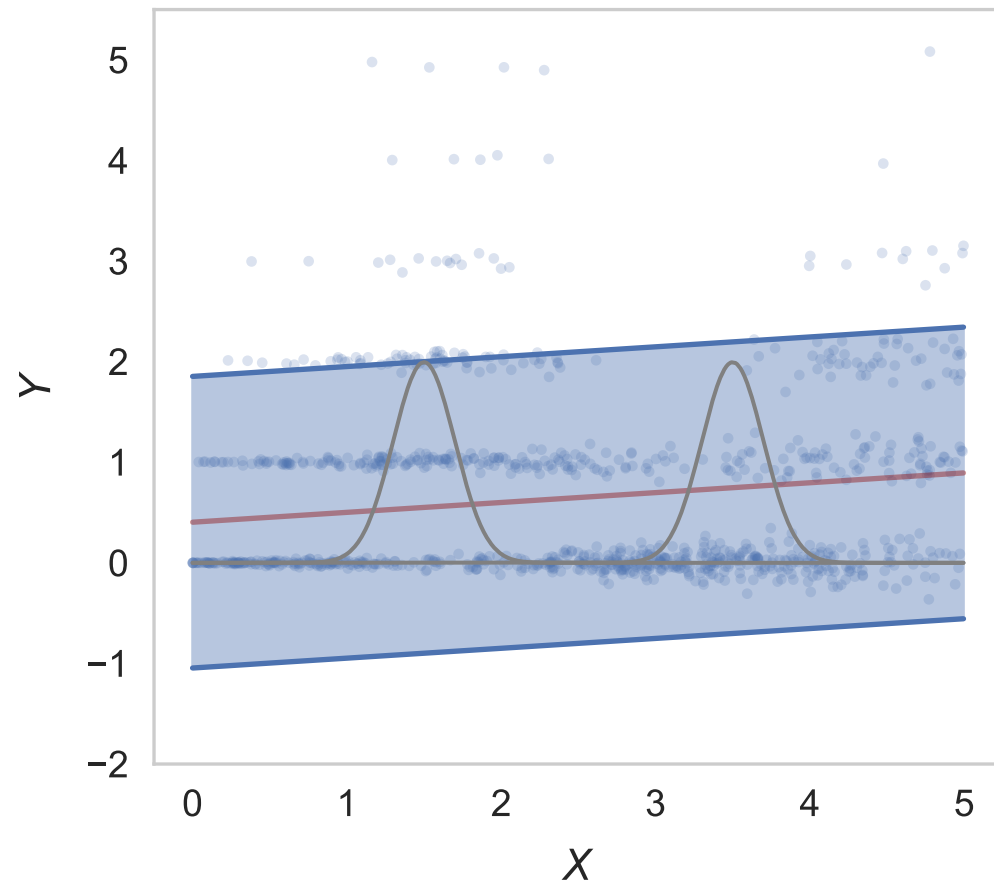

### Conditional Calibration

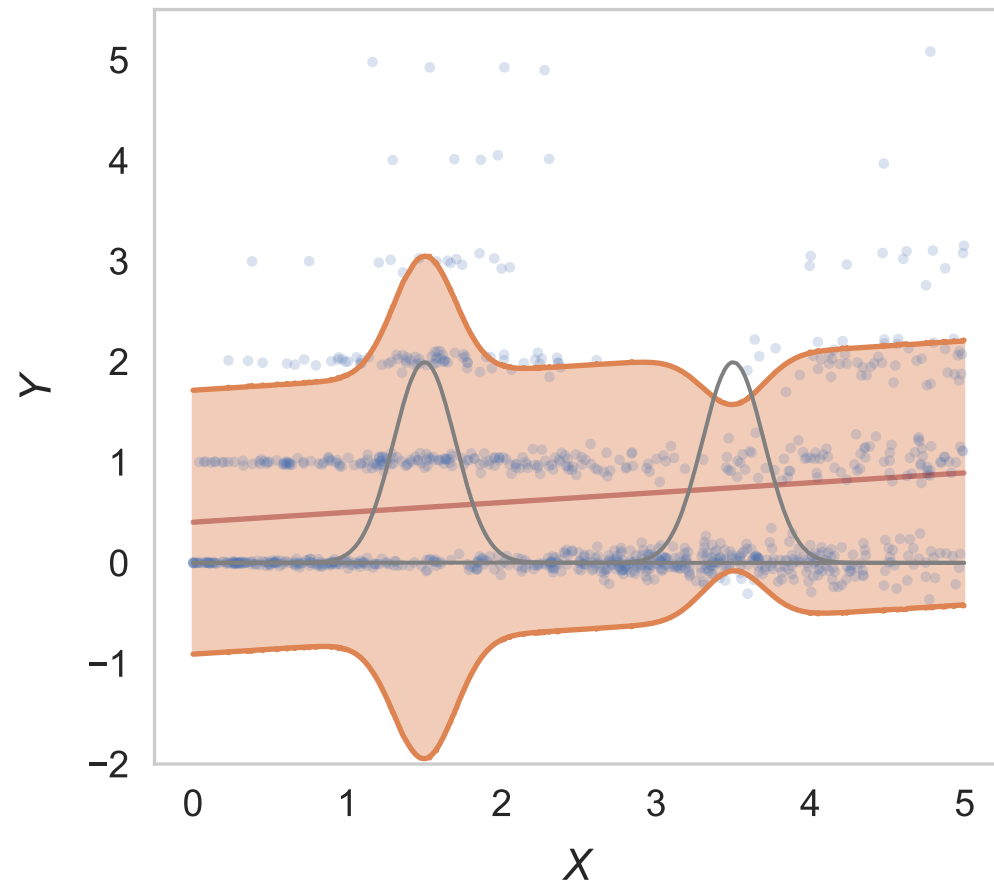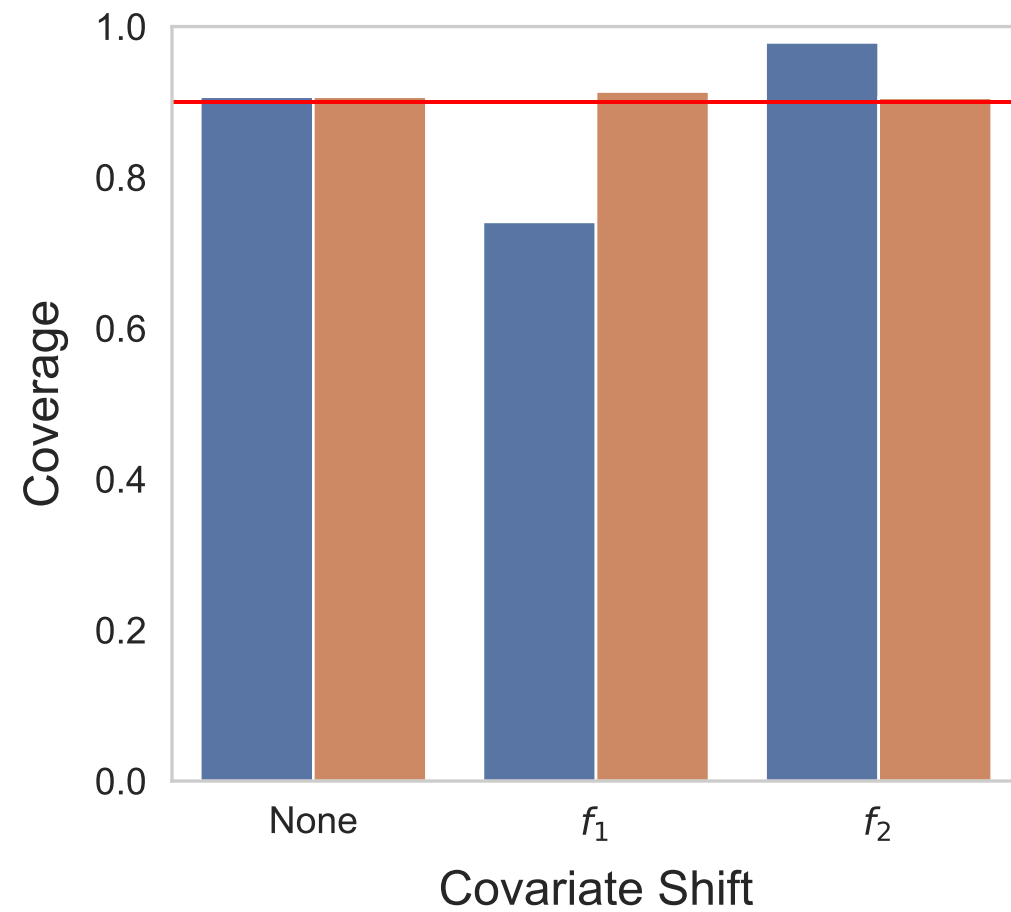

Supplement: supplementary_material [file attachment]

# Dual tracking

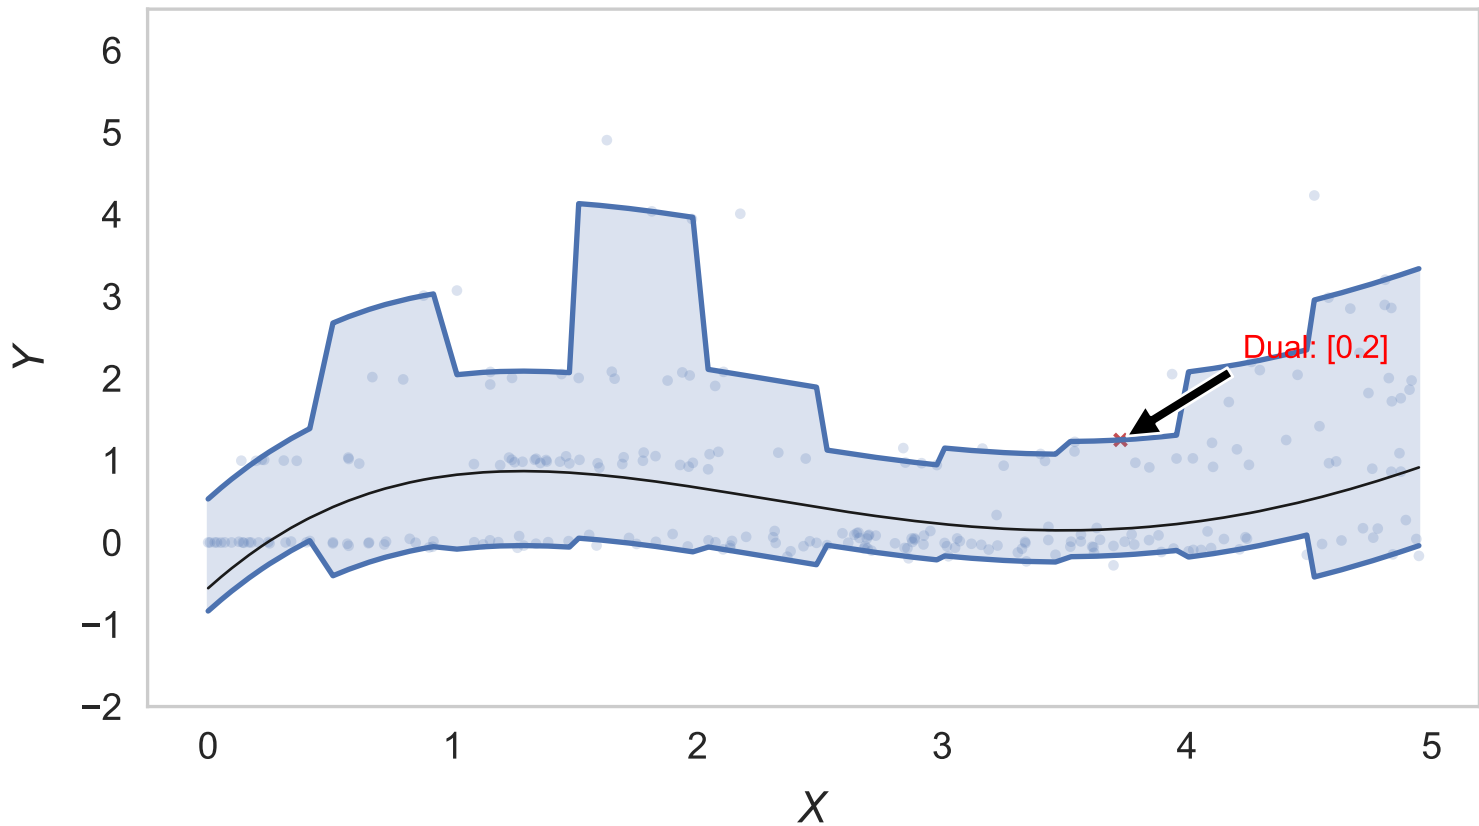

Supplement: supplementary_material [file attachment]

# Full conformal

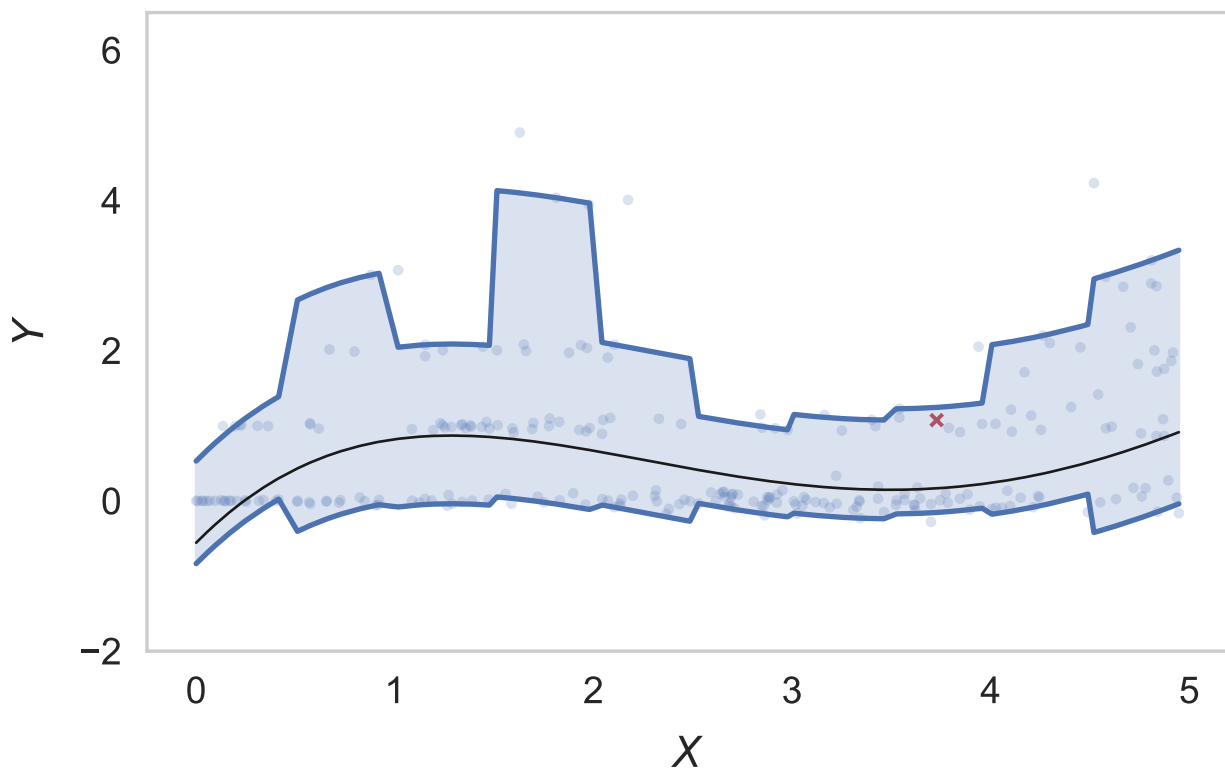

Supplement: supplementary_material [file attachment]

# Full conformal

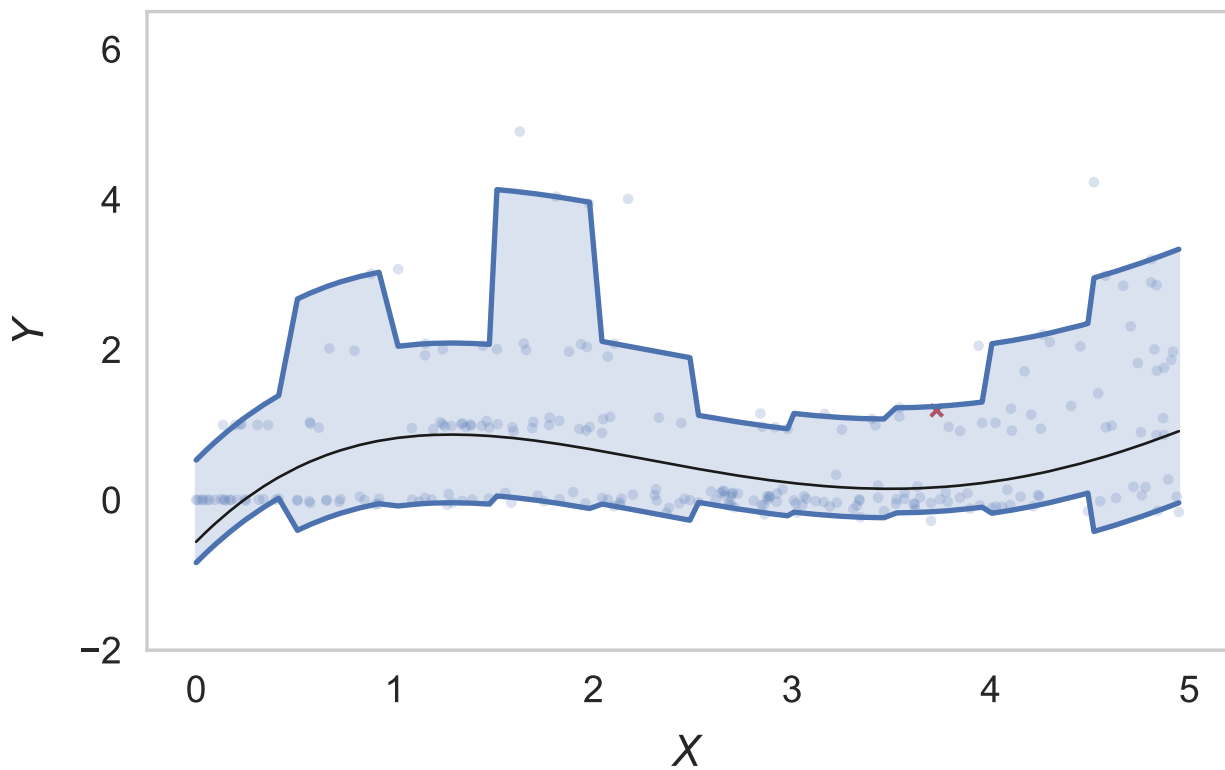

Supplement: supplementary_material [file attachment]

# Full conformal

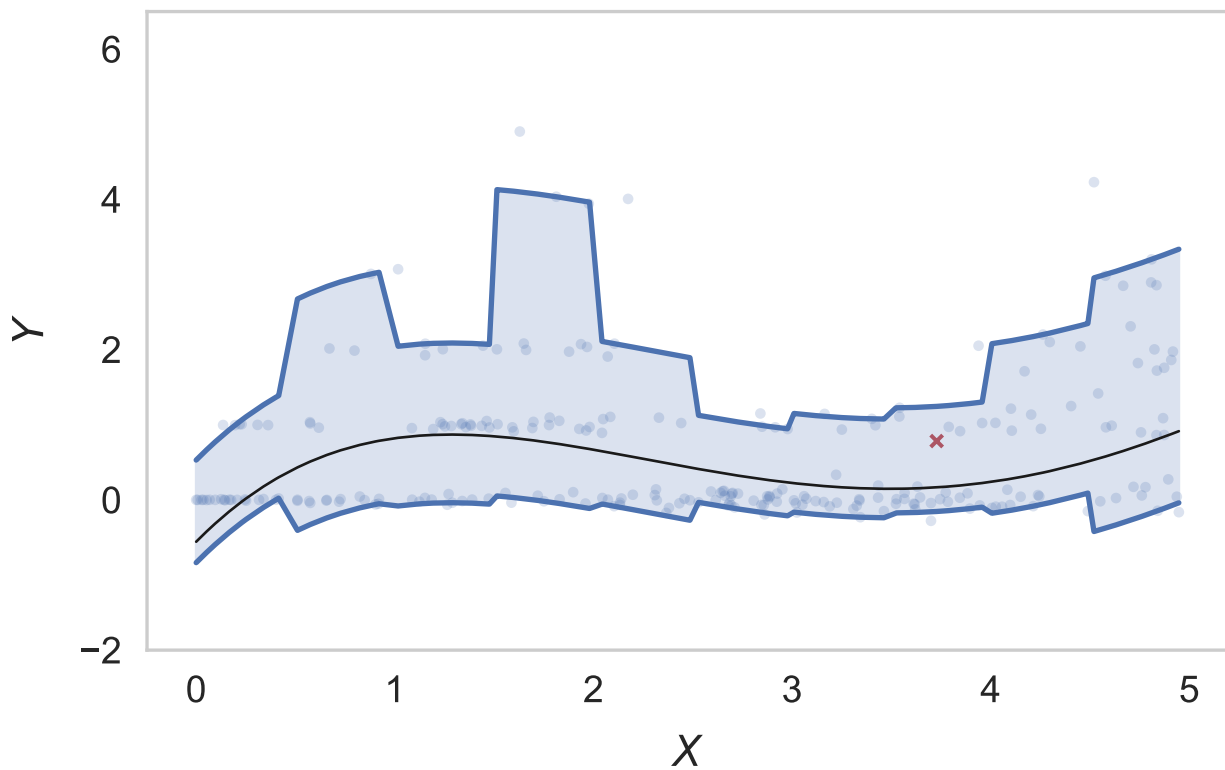

Supplement: supplementary_material [file attachment]

# Full conformal

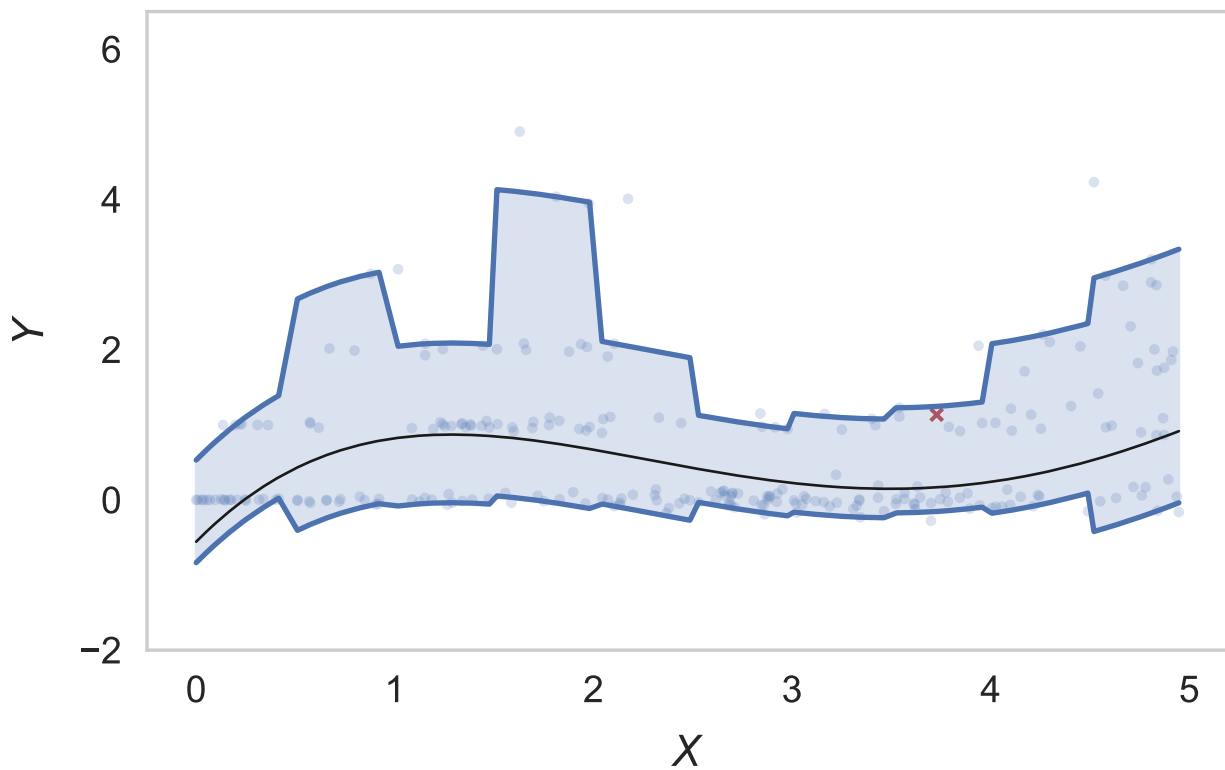

Supplement: supplementary_material [file attachment]

# Full conformal

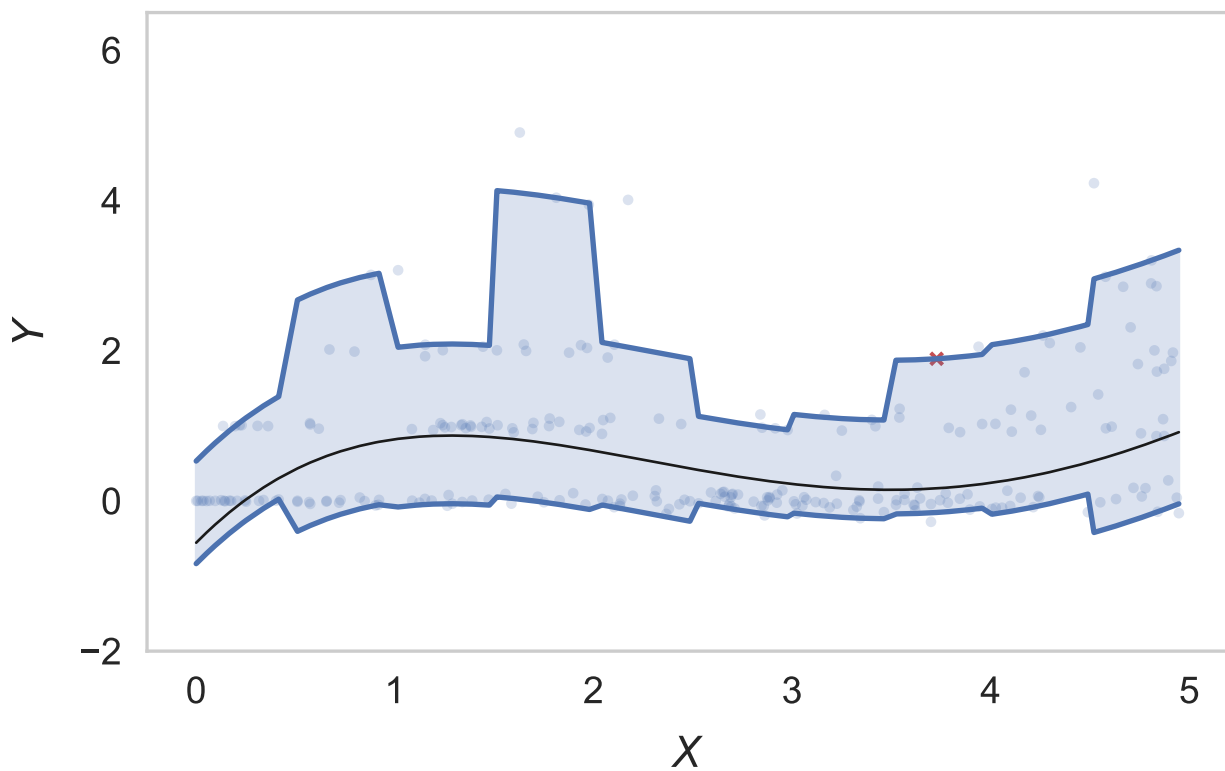

Supplement: supplementary_material [file attachment]

# Full conformal

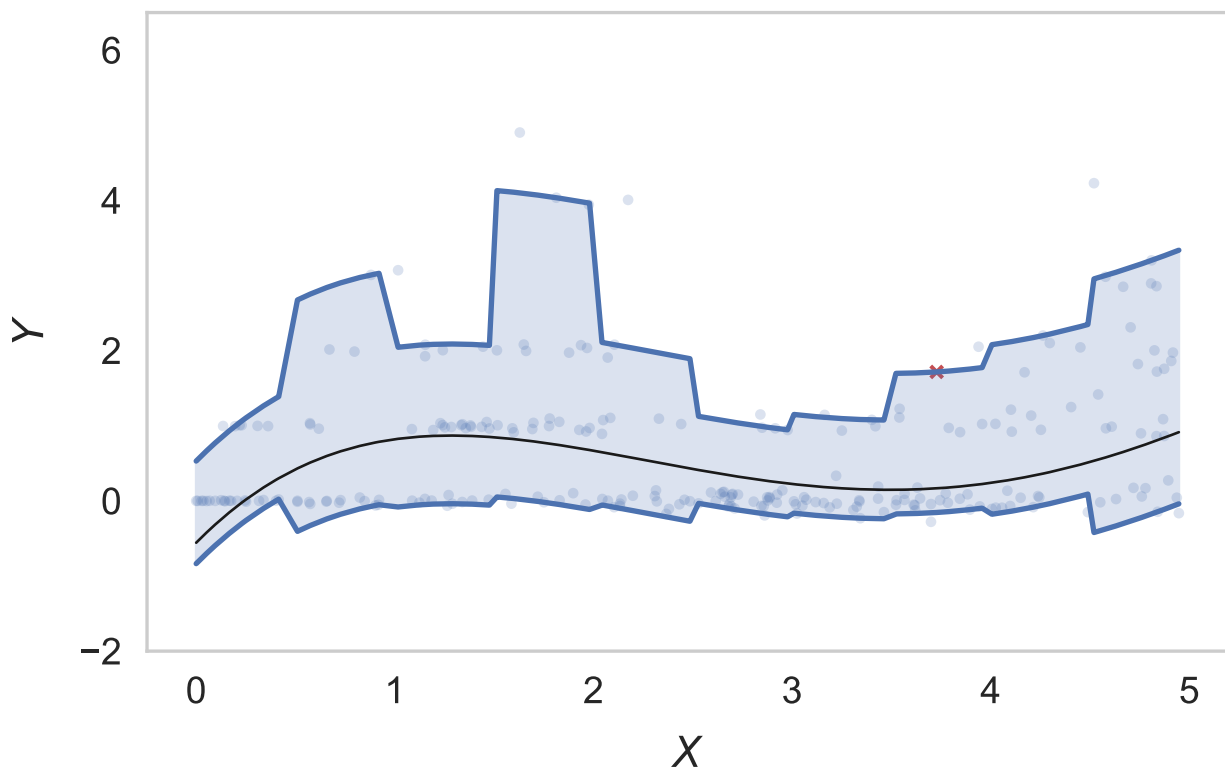

Supplement: supplementary_material [file attachment]

# Dual tracking

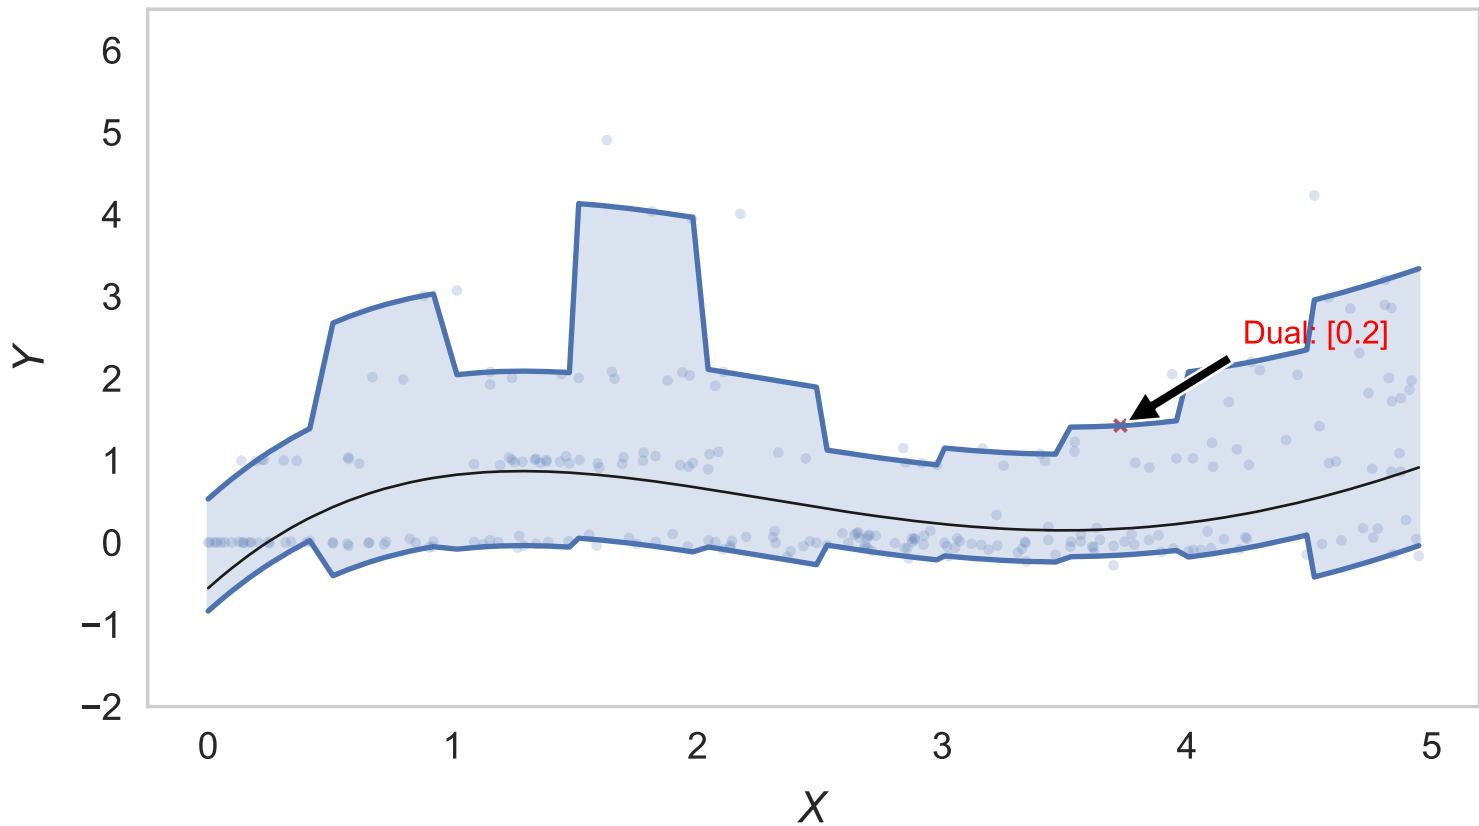

Supplement: supplementary_material [file attachment]

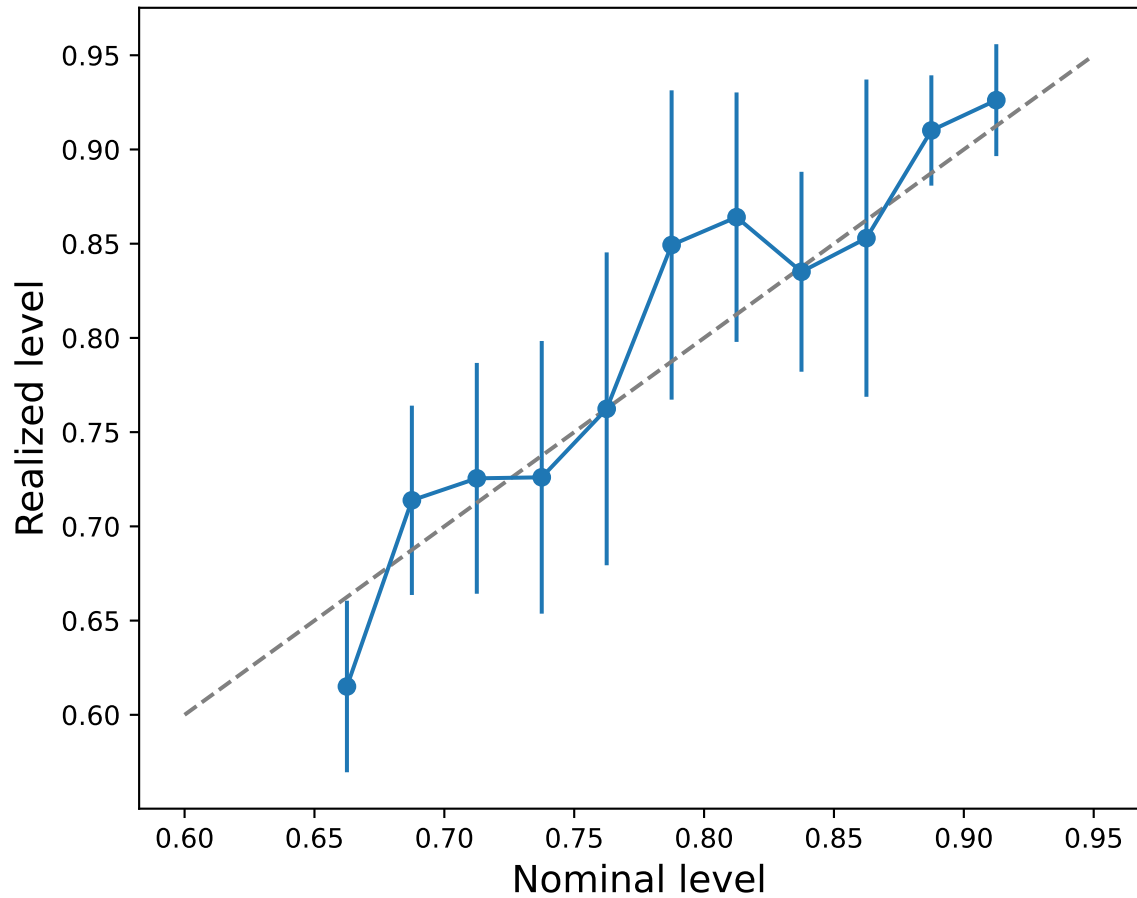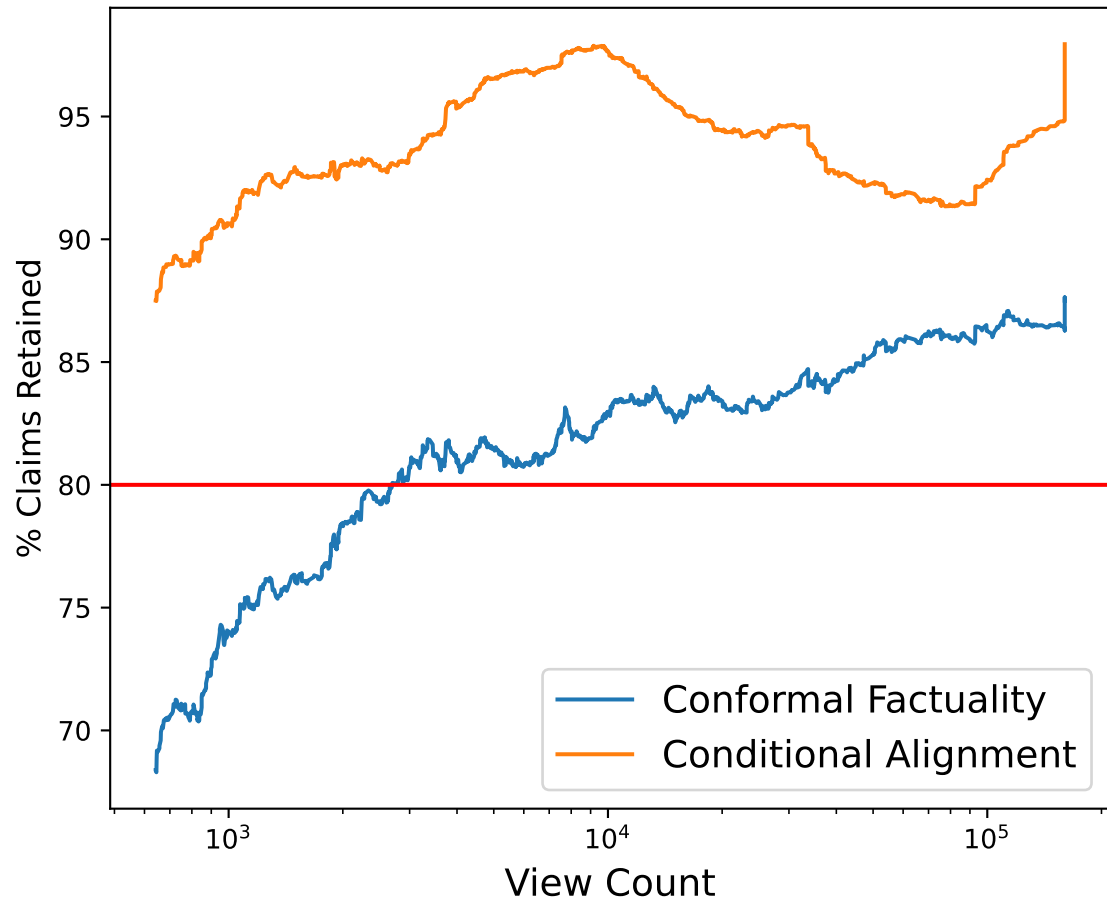

Supplement: supplementary_material [file attachment]

# Dual tracking

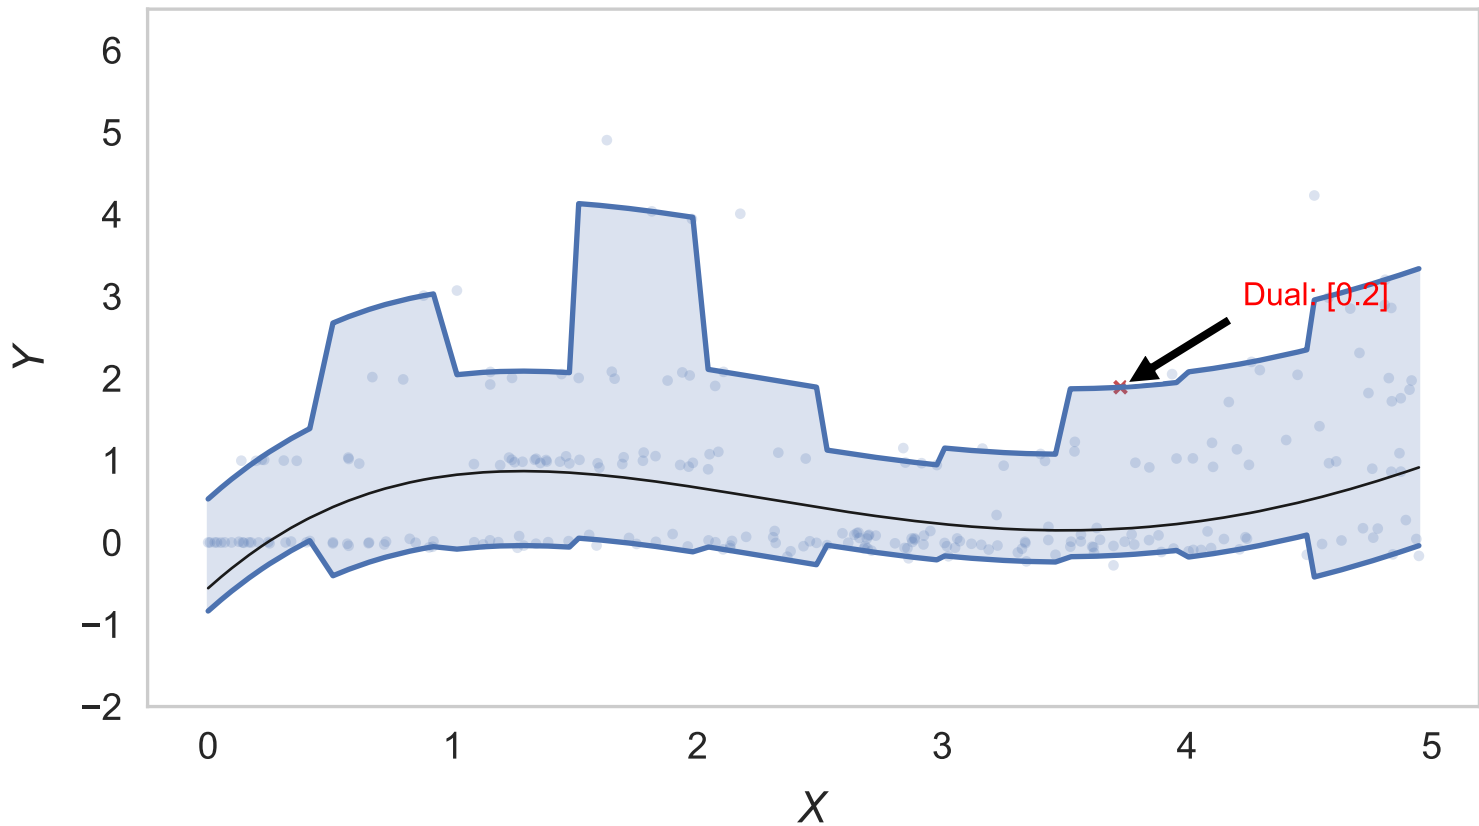

Supplement: supplementary_material [file attachment]

# Dual tracking

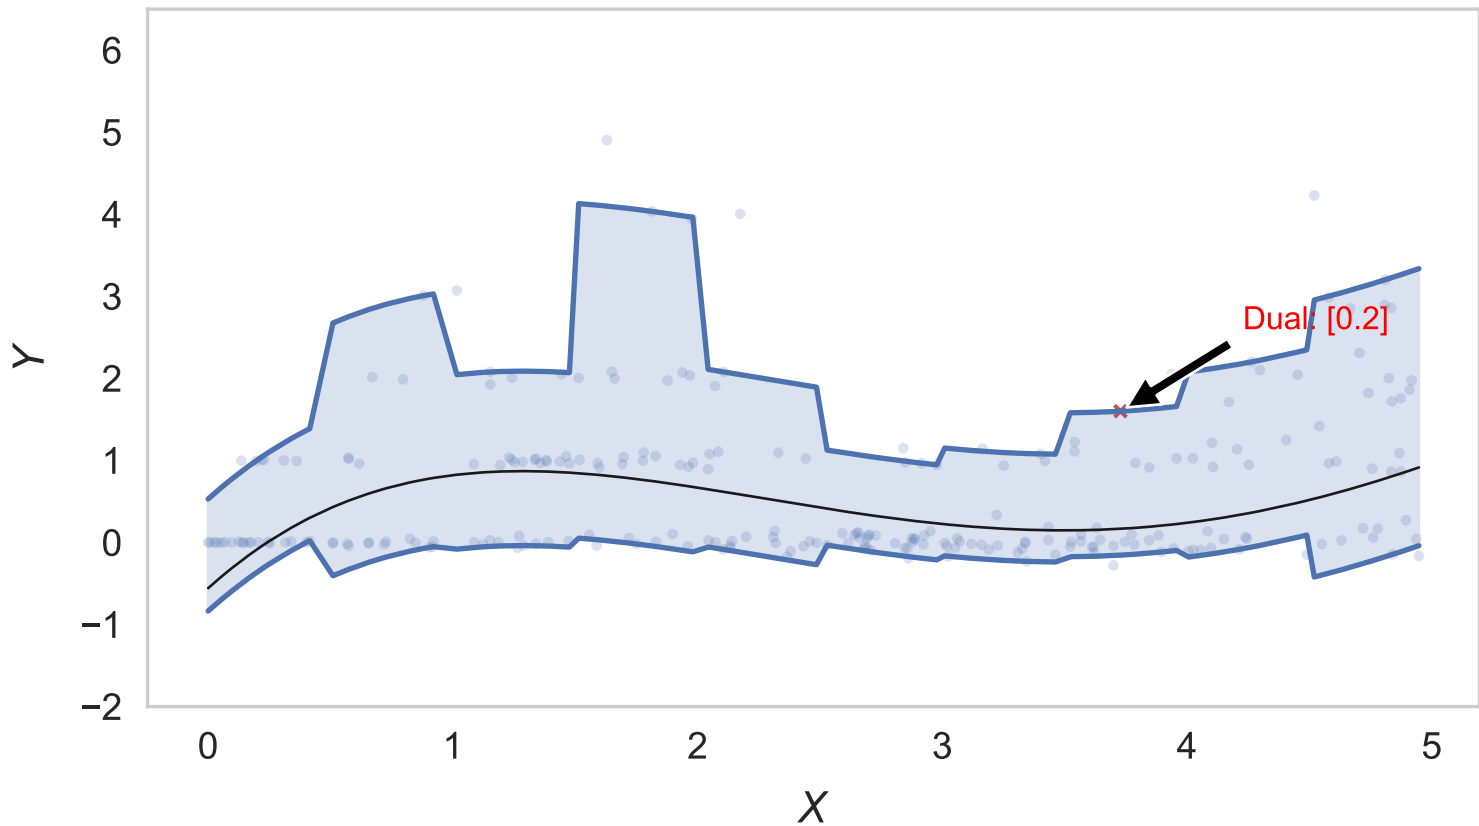

Supplement: supplementary_material [file attachment]
